# Supplementary material for: A novel approach to amino acid synthesis: acid-assisted reactions with dimethyl carbonate for efficient O-methylated, N,O-methylated and N-formylated derivatives
Source: Royal Society of Chemistry journal article supplement (doi:10.1039/d3gc03455k), 2024-01-01
Supplement: d3gc03455k1.pdf [file d3gc03455k1.pdf]

Electronic Supplementary Information (ESI)

**A novel approach to amino acid synthesis: acid-assisted reactions with dimethyl carbonate for efficient O-methylated, N,O-methylated and N-formylated derivatives**

Pattamabhorn Worsawat,<sup>a</sup> Pakin Noppawan,<sup>b</sup> Nontipa Supanchaiyamat,<sup>a</sup> Himmy Wu,<sup>c</sup> Con R. McElroy,<sup>c,d</sup> and Andrew J. Hunt<sup>\*a</sup>

<sup>a</sup>Materials Chemistry Research Center (MCRC), Department of Chemistry and Centre of Excellence for Innovation in Chemistry, Faculty of Science, Khon Kaen University, Khon Kaen, 40004, Thailand.

<sup>b</sup>Department of Chemistry, Faculty of Science, Mahasarakham University, Maha Sarakham, 44150, Thailand.

<sup>c</sup>Department of Chemistry, University of York, York, YO10 5DD, UK.

<sup>d</sup>School of Chemistry, University of Lincoln, Brayford Pool Campus, Lincoln, LN6 7TS, UK.

## Contents

|          |                                                                                                                                                                                                                                            |
|----------|--------------------------------------------------------------------------------------------------------------------------------------------------------------------------------------------------------------------------------------------|
| Page S5  | Table S1 The pKa values of alanine, phenylalanine, leucine, methionine, H <sub>2</sub> SO <sub>4</sub> , HClO <sub>4</sub> , HCl, HCO <sub>2</sub> H, DMC, H <sub>2</sub> O, RNH <sub>3</sub> <sup>+</sup> , MeOH and MeOH <sup>+</sup>    |
| Page S5  | Table S2 The experimental results of monomethylation products synthesized from different amino acids (1 equivalent) with DMC (20 equivalent) promoted by stoichiometric amount (1.00 equivalent) of HClO <sub>4</sub> at 150 °C            |
| Page S6  | Table S3 The experimental results of dimethylation products synthesized from different amino acids (1 equivalent) with DMC (40 equivalent) promoted by stoichiometric amount (1.00 equivalent) of H <sub>2</sub> SO <sub>4</sub> at 150 °C |
| Page S6  | Table S4 The experimental results of formylation products synthesized from different amino acids (1 equivalent) with DMC (20 equivalent) promoted by stoichiometric amount (1.00 equivalent) of formic acid at 150 °C                      |
| Page S7  | Table S5 All experimental results of reaction of amino acids promoted by stoichiometric amount (1.00 equivalent) of different acid catalysts with DMC (20, 40 and 80 equivalent) at 150 °C                                                 |
| Page S8  | Table S6 Optical rotation experiment in EtOH                                                                                                                                                                                               |
| Page S9  | 2. Characterization of structures of products                                                                                                                                                                                              |
| Page S9  | Figure S1. <sup>1</sup> HNMR of DL-alanine methyl ester in CD <sub>3</sub> OD                                                                                                                                                              |
| Page S9  | Figure S2. <sup>13</sup> CNMR of DL-alanine methyl ester in CD <sub>3</sub> OD                                                                                                                                                             |
| Page S10 | Figure S3. HMBC of DL-alanine methyl ester in CD <sub>3</sub> OD                                                                                                                                                                           |
| Page S10 | Figure S4. Compare the effect DMC assisted by HClO <sub>4</sub> in the reaction of alanine                                                                                                                                                 |
| Page S11 | Figure S5. <sup>1</sup> HNMR of DL-phenylalanine methyl ester in DMSO- <i>d</i> <sub>6</sub> +CD <sub>3</sub> OD                                                                                                                           |
| Page S11 | Figure S6. <sup>13</sup> CNMR of DL-phenylalanine methyl ester in DMSO- <i>d</i> <sub>6</sub> +CDCl <sub>3</sub>                                                                                                                           |
| Page S12 | Figure S7. HMBC of DL- phenylalanine in CD <sub>3</sub> OD                                                                                                                                                                                 |
| Page S12 | Figure S8. Compare the effect DMC assisted by HClO <sub>4</sub> in the reaction of                                                                                                                                                         |
| Page S13 | Figure S9. <sup>1</sup> HNMR of DL-leucine methyl ester in CD <sub>3</sub> OD+CDCl <sub>3</sub>                                                                                                                                            |
| Page S13 | Figure S10. <sup>13</sup> CNMR of DL-leucine methyl ester in CD <sub>3</sub> OD+CDCl <sub>3</sub>                                                                                                                                          |
| Page S14 | Figure S11. HMBC of DL- leucine methyl ester in CD <sub>3</sub> OD                                                                                                                                                                         |
| Page S14 | Figure S12. Compare the effect DMC assisted by HClO <sub>4</sub> in the reaction of leucine                                                                                                                                                |
| Page S15 | Figure S13. <sup>1</sup> HNMR of DL- <i>N</i> -methyl alanine methyl ester ammonium in CD <sub>3</sub> OD+CDCl <sub>3</sub>                                                                                                                |
| Page S15 | Figure S14. <sup>13</sup> CNMR of DL- <i>N</i> -methyl alanine methyl ester ammonium in CD <sub>3</sub> OD+CDCl <sub>3</sub>                                                                                                               |
| Page S16 | Figure S15. HMBC of DL- <i>N</i> -methyl alanine methyl ester ammonium in CD <sub>3</sub> OD                                                                                                                                               |
| Page S16 | Figure S16. Compare the effect DMC assisted by H <sub>2</sub> SO <sub>4</sub> in the reaction of alanine                                                                                                                                   |
| Page S17 | Figure S17. <sup>1</sup> HNMR of DL- <i>N</i> -methyl phenylalanine methyl ester ammonium in CDCl <sub>3</sub> +DMSO- <i>d</i> <sub>6</sub>                                                                                                |
| Page S17 | Figure S18. <sup>13</sup> CNMR of DL- <i>N</i> -methyl phenylalanine methyl ester ammonium in CDCl <sub>3</sub> +DMSO- <i>d</i> <sub>6</sub>                                                                                               |
| Page S18 | Figure S19. HMBC of DL- <i>N</i> -methyl phenylalanine methyl ester ammonium in CD <sub>3</sub> OD                                                                                                                                         |
| Page S18 | Figure S20. Compare the effect DMC assisted by H <sub>2</sub> SO <sub>4</sub> in the reaction of phenylalanine                                                                                                                             |
| Page S19 | Figure S21. <sup>1</sup> HNMR of DL- <i>N</i> -methyl leucine methyl ester ammonium in CD <sub>3</sub> OD+CDCl <sub>3</sub>                                                                                                                |
| Page S19 | Figure S22. <sup>13</sup> CNMR of DL- <i>N</i> -methyl leucine methyl ester ammonium in CD <sub>3</sub> OD+CDCl <sub>3</sub>                                                                                                               |
| Page S20 | Figure S23. HMBC of DL- <i>N</i> -methyl leucine methyl ester ammonium in CD <sub>3</sub> OD                                                                                                                                               |
| Page S20 | Figure S24. Compare the effect DMC assisted by H <sub>2</sub> SO <sub>4</sub> in the reaction of leucine                                                                                                                                   |
| Page S21 | Figure S25. <sup>1</sup> HNMR of DL- formylalanine in CD <sub>3</sub> OD                                                                                                                                                                   |
| Page S21 | Figure S26. <sup>13</sup> CNMR of DL- formylalanine in CD <sub>3</sub> OD+CDCl <sub>3</sub>                                                                                                                                                |
| Page S22 | Figure S27. HMBC of DL- formylalanine in CD <sub>3</sub> OD                                                                                                                                                                                |
| Page S22 | Figure S28. Compare the effect DMC assisted by formic acid in the reaction of alanine                                                                                                                                                      |
| Page S23 | Figure S29. <sup>1</sup> HNMR of DL- 2-amino-3-phenylpropanoic formic anhydride in CDCl <sub>3</sub> +CD <sub>3</sub> OD                                                                                                                   |
| Page S23 | Figure S30. <sup>13</sup> CNMR of DL-2-amino-3-phenylpropanoic formic anhydride in CDCl <sub>3</sub> + CD <sub>3</sub> OD                                                                                                                  |
| Page S24 | Figure S31. HMBC of DL- formyleucine in CD <sub>3</sub> OD                                                                                                                                                                                 |
| Page S24 | Figure S32. Compare the effect DMC assisted by formic acid in the reaction of leucine                                                                                                                                                      |
| Page S25 | Figure S33. <sup>1</sup> HNMR of DL-formylphenylalanine in CDCl <sub>3</sub> +CD <sub>3</sub> OD                                                                                                                                           |
| Page S25 | Figure S34. <sup>13</sup> CNMR of DL-formylphenylalanine in CDCl <sub>3</sub> +CD <sub>3</sub> OD                                                                                                                                          |
| Page S26 | Figure S35. HMBC of DL-formylphenylalanine in CD <sub>3</sub> OD                                                                                                                                                                           |
| Page S26 | Figure S36. Compare the effect DMC assisted by formic acid in the reaction of phenylalanine                                                                                                                                                |

|          |                                                                                                                                                                              |
|----------|------------------------------------------------------------------------------------------------------------------------------------------------------------------------------|
| Page S27 | Figure S37. <sup>1</sup> H NMR of DL-formymethionine in CDCl <sub>3</sub> +CD <sub>3</sub> OD                                                                                |
| Page S27 | Figure S38. <sup>13</sup> C NMR of DL-formymethionine in CDCl <sub>3</sub> +CD <sub>3</sub> OD                                                                               |
| Page S28 | Figure S39. HMBC of DL- formymethionine in CD <sub>3</sub> OD                                                                                                                |
| Page S28 | Figure S40. Compare the effect DMC assisted by formic acid in the reaction of methionine                                                                                     |
| Page S29 | Figure S41. <sup>1</sup> H NMR of DL-alanine in D <sub>2</sub> O                                                                                                             |
| Page S29 | Figure S42. <sup>13</sup> C NMR of DL-alanine in D <sub>2</sub> O                                                                                                            |
| Page S30 | Figure S43. <sup>1</sup> H NMR of phenylalanine in D <sub>2</sub> O                                                                                                          |
| Page S30 | Figure S44. <sup>13</sup> C NMR of DL-phenylalanine in D <sub>2</sub> O                                                                                                      |
| Page S31 | Figure S45. <sup>1</sup> H NMR of DL-leucine in D <sub>2</sub> O                                                                                                             |
| Page S31 | Figure S46. <sup>13</sup> C NMR of DL-leucine in D <sub>2</sub> O                                                                                                            |
| Page S32 | Figure S47. <sup>1</sup> H NMR of DL-methionine in D <sub>2</sub> O                                                                                                          |
| Page S32 | Figure S48. <sup>13</sup> C NMR of DL-methionine in D <sub>2</sub> O                                                                                                         |
| Page S33 | Figure S49. <sup>1</sup> H NMR of reaction of DL-alanine using HClO <sub>4</sub> under reflux (90 °C) in DMSO                                                                |
| Page S33 | Figure S50. <sup>1</sup> H NMR of reaction of DL-alanine using H <sub>2</sub> SO <sub>4</sub> under reflux (90 °C) in DMSO                                                   |
| Page S34 | Figure S51. <sup>1</sup> H NMR of reaction of DL-alanine using HCl under reflux (90 °C) in DMSO                                                                              |
| Page S34 | Figure S52. <sup>1</sup> H NMR of reaction of DL-alanine using HNO <sub>3</sub> under reflux (90 °C) in DMSO                                                                 |
| Page S35 | Figure S53. <sup>1</sup> H NMR of reaction of DL-alanine using HCO <sub>2</sub> H under reflux (90 °C) in DMSO                                                               |
| Page S35 | Figure S54. <sup>1</sup> H NMR of reaction of DL-alanine with HCl in CDCl <sub>3</sub> +CD <sub>3</sub> OD                                                                   |
| Page S36 | Figure S55. <sup>1</sup> H NMR of reaction of DL-alanine with HNO <sub>3</sub> in CDCl <sub>3</sub> +CD <sub>3</sub> OD                                                      |
| Page S36 | Figure S56. <sup>1</sup> H NMR of reaction of DL-alanine with FeCl <sub>3</sub> in CDCl <sub>3</sub> +CD <sub>3</sub> OD                                                     |
| Page S37 | Figure S57. <sup>1</sup> H NMR of reaction of DL-alanine with AlCl <sub>3</sub> in CDCl <sub>3</sub> +CD <sub>3</sub> OD                                                     |
| Page S37 | Figure S58. <sup>1</sup> H NMR of reaction of DL-alanine with H <sub>2</sub> SO <sub>4</sub> -SiO <sub>2</sub> in CDCl <sub>3</sub> +CD <sub>3</sub> OD                      |
| Page S38 | Figure S59. <sup>1</sup> H NMR of reaction of DL-alanine with HClO <sub>4</sub> -SiO <sub>2</sub> in CDCl <sub>3</sub> +CD <sub>3</sub> OD                                   |
| Page S38 | Figure S60. <sup>1</sup> H NMR of decomposition of methionine with HClO <sub>4</sub> (water as solvent instead of DMC) in CDCl <sub>3</sub> +CD <sub>3</sub> OD              |
| Page S39 | Figure S61. <sup>1</sup> H NMR of decomposition of methionine with H <sub>2</sub> SO <sub>4</sub> (water as solvent instead of DMC) in CDCl <sub>3</sub> +CD <sub>3</sub> OD |
| Page S39 | Figure S62. <sup>1</sup> H NMR of uncomplete reaction of methionine with HCO <sub>2</sub> H (water as solvent instead of DMC) in CDCl <sub>3</sub> +CD <sub>3</sub> OD       |
| Page S40 | Figure S63. <sup>1</sup> H NMR of DMC in CDCl <sub>3</sub>                                                                                                                   |
| Page S40 | Figure S64. <sup>1</sup> H NMR of HCO <sub>2</sub> H in CDCl <sub>3</sub>                                                                                                    |
| Page S41 | Figure S65. <sup>1</sup> H NMR of reaction of DMC and HCO <sub>2</sub> H (20:1) in CDCl <sub>3</sub>                                                                         |
| Page S41 | Figure S66. <sup>1</sup> H NMR of reaction of DMC and HCO <sub>2</sub> H (1:1) in CDCl <sub>3</sub>                                                                          |
| Page S42 | Figure S67. <sup>1</sup> H NMR of L-alanine methyl ester in CD <sub>3</sub> OD + CDCl <sub>3</sub>                                                                           |
| Page S42 | Figure S68. <sup>1</sup> H NMR of L-leucine methyl ester in CD <sub>3</sub> OD + CDCl <sub>3</sub>                                                                           |
| Page S43 | Figure S69. <sup>1</sup> H NMR of L-proline methyl ester in CD <sub>3</sub> OD + CDCl <sub>3</sub>                                                                           |
| Page S43 | Figure S70. <sup>13</sup> C NMR of L-proline methyl ester in CD <sub>3</sub> OD + CDCl <sub>3</sub>                                                                          |
| Page S44 | Figure S71. <sup>1</sup> H NMR of L-glycine methyl ester in CD <sub>3</sub> OD + CDCl <sub>3</sub>                                                                           |
| Page S44 | Figure S72. <sup>13</sup> C NMR of glycine methyl ester in CD <sub>3</sub> OD + CDCl <sub>3</sub>                                                                            |
| Page S45 | Figure S73. <sup>1</sup> H NMR of L-histidine methyl ester in CD <sub>3</sub> OD                                                                                             |
| Page S45 | Figure S74. <sup>13</sup> C NMR of L-histidine methyl ester in CD <sub>3</sub> OD                                                                                            |
| Page S46 | Figure S75. <sup>1</sup> H NMR of L-tyrosine methyl ester in CD <sub>3</sub> OD + CDCl <sub>3</sub>                                                                          |
| Page S46 | Figure S76. <sup>13</sup> C NMR of L-tyrosine methyl ester in CD <sub>3</sub> OD + CDCl <sub>3</sub>                                                                         |
| Page S47 | Figure S77. <sup>1</sup> H NMR of L-glutamine methyl ester in CD <sub>3</sub> OD + CDCl <sub>3</sub>                                                                         |
| Page S47 | Figure S78. <sup>1</sup> H NMR of L-tryptophan methyl ester in CD <sub>3</sub> OD + CDCl <sub>3</sub>                                                                        |
| Page S48 | Figure S79. <sup>1</sup> H NMR of L-lysine in HClO <sub>4</sub> condition                                                                                                    |
| Page S48 | Figure S80. <sup>1</sup> H NMR of L-cystine in HClO <sub>4</sub> condition                                                                                                   |
| Page S49 | Figure S81. <sup>1</sup> H NMR of D-serine HClO <sub>4</sub> condition                                                                                                       |
| Page S49 | Figure S82. <sup>1</sup> H NMR of aspartame in HClO <sub>4</sub>                                                                                                             |
| Page S50 | Figure S83. <sup>1</sup> H NMR of L-glutathione in HClO <sub>4</sub> condition                                                                                               |
| Page S50 | Figure S84. <sup>1</sup> H NMR of L-N-methyl alanine methyl ester ammonium in CD <sub>3</sub> OD + CDCl <sub>3</sub>                                                         |
| Page S51 | Figure S85. <sup>1</sup> H NMR of L-N-methyl alanine methyl ester ammonium in CD <sub>3</sub> OD + CDCl <sub>3</sub>                                                         |
| Page S51 | Figure S86. <sup>1</sup> H NMR of L-N-methyl Proline in H <sub>2</sub> SO <sub>4</sub>                                                                                       |
| Page S52 | Figure S87. <sup>1</sup> H NMR of L-N-methyl glycine methyl ester ammonium in CD <sub>3</sub> OD + CDCl <sub>3</sub>                                                         |
| Page S52 | Figure S88. <sup>13</sup> C NMR of L-N-methyl glycine methyl ester ammonium in CD <sub>3</sub> OD + CDCl <sub>3</sub>                                                        |
| Page S53 | Figure S89. <sup>1</sup> H NMR of L-histidine in H <sub>2</sub> SO <sub>4</sub>                                                                                              |
| Page S53 | Figure S90. <sup>1</sup> H NMR of N-methyl-L- tyrosine methyl ester ammonium in CD <sub>3</sub> OD + CDCl <sub>3</sub>                                                       |

|          |                                                                                                                                 |
|----------|---------------------------------------------------------------------------------------------------------------------------------|
| Page S54 | Figure S91. $^{13}\text{C}$ NMR of L- <i>N</i> -methyl tyrosine methyl ester ammonium in $\text{CD}_3\text{OD} + \text{CDCl}_3$ |
| Page S54 | Figure S92 $^1\text{H}$ NMR of L-Glutamine in $\text{H}_2\text{SO}_4$                                                           |
| Page S55 | Figure S93 $^1\text{H}$ NMR of L-Tryptophan in $\text{H}_2\text{SO}_4$                                                          |
| Page S55 | Figure S94 $^1\text{H}$ NMR of L-Crystine in $\text{H}_2\text{SO}_4$                                                            |
| Page S56 | Figure S95 $^1\text{H}$ NMR of D-serine in $\text{H}_2\text{SO}_4$                                                              |
| Page S56 | Figure S96 $^1\text{H}$ NMR of L-aspartame in $\text{H}_2\text{SO}_4$                                                           |
| Page S57 | Figure S97 $^1\text{H}$ NMR of L-glutathione in $\text{H}_2\text{SO}_4$                                                         |
| Page S57 | Figure S98. $^1\text{H}$ NMR of <i>N</i> -formylation of L-alanine in $\text{CD}_3\text{OD} + \text{CDCl}_3$                    |
| Page S58 | Figure S99. $^1\text{H}$ NMR of <i>N</i> -formylation of L-leucine in $\text{CD}_3\text{OD} + \text{CDCl}_3$                    |
| Page S58 | Figure S100. $^1\text{H}$ NMR of <i>N</i> L-proline in formic acid                                                              |
| Page S59 | Figure S101. $^1\text{H}$ NMR of <i>N</i> -formylation of L-glycine in $\text{CD}_3\text{OD} + \text{CDCl}_3$                   |
| Page S59 | Figure S102. $^{13}\text{C}$ NMR of <i>N</i> -formylation of L-glycine in $\text{CD}_3\text{OD} + \text{CDCl}_3$                |
| Page S60 | Figure S103. $^1\text{H}$ NMR of <i>N</i> -formylation of L-histidine in $\text{CD}_3\text{OD} + \text{CDCl}_3$                 |
| Page S60 | Figure S104. $^1\text{H}$ NMR of <i>N</i> -formylation of L-tyrosine in $\text{CD}_3\text{OD} + \text{CDCl}_3$                  |
| Page S61 | Figure S105. $^{13}\text{C}$ NMR of <i>N</i> -formylation of L-tyrosine in $\text{CD}_3\text{OD} + \text{CDCl}_3$               |
| Page S61 | Figure S106. $^1\text{H}$ NMR of L-glutamine in formic acid                                                                     |
| Page S62 | Figure S107. $^1\text{H}$ NMR of L-lysine in formic acid                                                                        |
| Page S62 | Figure S108. $^1\text{H}$ NMR of L-cystine in formic acid                                                                       |
| Page S63 | Figure S109. $^1\text{H}$ NMR of D-serine in formic acid                                                                        |
| Page S63 | Figure S110. $^1\text{H}$ NMR of aspartame in formic acid                                                                       |
| Page S64 | Figure S111. $^1\text{H}$ NMR of L-glutathione in formic acid                                                                   |
| Page S64 | Figure S112. $^1\text{H}$ NMR of upscale 12 times alanine reaction with $\text{HClO}_4$                                         |
| Page S65 | 3. Green metrics calculations                                                                                                   |
| Page S70 | References                                                                                                                      |

## The nature of amino acid

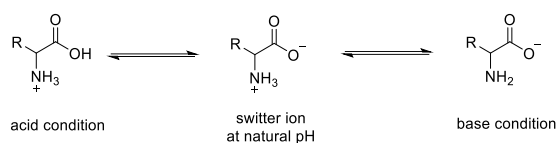

**Table S1** The  $pK_a$  values of alanine, phenylalanine, leucine, methionine,  $\text{H}_2\text{SO}_4$ ,  $\text{HClO}_4$ ,  $\text{HCl}$ ,  $\text{HCO}_2\text{H}$ , DMC,  $\text{H}_2\text{O}$ ,  $\text{RNH}_3^+$ , MeOH and  $\text{MeOH}^{+1-3}$

| Compound                |                     | $pK_a$ |
|-------------------------|---------------------|--------|
| Alanine                 | $\alpha$ -COOH      | 2.35   |
|                         | $\alpha$ -NH $_3^+$ | 9.87   |
| Phenylalanine           | $\alpha$ -COOH      | 2.58   |
|                         | $\alpha$ -NH $_3^+$ | 9.24   |
| Leucine                 | $\alpha$ -COOH      | 2.33   |
|                         | $\alpha$ -NH $_3^+$ | 9.74   |
| methionine              | $\alpha$ -COOH      | 2.17   |
|                         | $\alpha$ -NH $_3^+$ | 9.27   |
| $\text{H}_2\text{SO}_4$ |                     | -2     |
| $\text{HSO}_4^-$        |                     | 2      |
| $\text{HClO}_4$         |                     | -10    |
| $\text{HCl}$            |                     | -7     |
| $\text{HNO}_3$          |                     | -1.5   |
| formic acid             |                     | 3.75   |
| $\text{H}_2\text{O}$    |                     | 15.74  |
| $\text{H}_3\text{O}^+$  |                     | -1.7   |
| MeOH                    |                     | 15.54  |
| $\text{MeOH}_2^+$       |                     | -2.2   |
| $\text{R-NH}_2$         |                     | 35-45  |

**Table S2** The experimental results of monomethylation products synthesised from different amino acids (1 equivalent) with DMC (20 equivalent) promoted by stoichiometric amount (1.00 equivalent) of  $\text{HClO}_4$  at 150 °C

| Substrate | Product | % conversion | yield |
|-----------|---------|--------------|-------|
|           |         | >99          | >99   |
|           |         | >99          | >99   |
|           |         | >99          | >99   |
|           | unknown | >99          | -     |

**Table S3** The experimental results of dimethylation products synthesised from different amino acids (1 equivalent) with DMC (40 equivalent) promoted by stoichiometric amount (1.00 equivalent) of H<sub>2</sub>SO<sub>4</sub> at 150 °C

| Substrate                                                                         | Product                                                                           | % conversion | yield |
|-----------------------------------------------------------------------------------|-----------------------------------------------------------------------------------|--------------|-------|
| 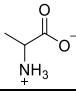 | 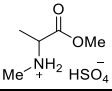 | >99          | >99   |
| 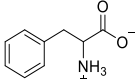 | 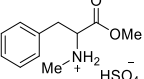 | >99          | >99   |
| 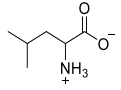 | 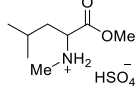 | >99          | >99   |
| 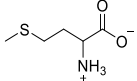 | unknown                                                                           | >99          | -     |

**Table S4** The experimental results of formylation products synthesised from different amino acids (1 equivalent) with DMC (20 equivalent) promoted by stoichiometric amount (1.00 equivalent) of formic acid at 150 °C

| Substrate                                                                           | Product                                                                             | % conversion | yield |
|-------------------------------------------------------------------------------------|-------------------------------------------------------------------------------------|--------------|-------|
| 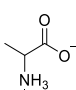 | 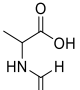 | >99          | >99   |
| 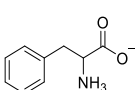 | 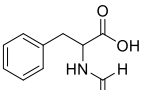 | >99          | >99   |
| 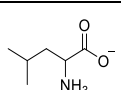 | 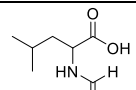 | >99          | >99   |
| 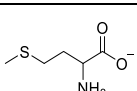 | 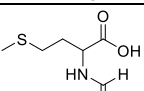 | >99          | >99   |

**Table S5** All experimental results of reaction of amino acids promoted by stoichiometric amount (1.00 equivalent) of different acid catalysts with DMC (20, 40 and 80 equivalent) at 150 °C

| Substrate<br>(1 mmol) | Catalyst<br>(1 mmol)                             | Product       | DMC (mmol)    |             |             |
|-----------------------|--------------------------------------------------|---------------|---------------|-------------|-------------|
|                       |                                                  |               | 20            | 40          | 80          |
|                       |                                                  |               | %Conversion   | %Conversion | %Conversion |
| alanine               | HClO <sub>4</sub>                                | A1            | >99           | 79.38       | 53.70       |
| phenylalanine         | HClO <sub>4</sub>                                | A2            | >99           | 80.15       | 49.26       |
| leucine               | HClO <sub>4</sub>                                | A3            | >99           | 87.71       | 53.70       |
| methionine            | HClO <sub>4</sub>                                | Decomposition |               |             |             |
| alanine               | H <sub>2</sub> SO <sub>4</sub>                   | B1            | 59.68         | >99         | 73.04       |
| phenylalanine         | H <sub>2</sub> SO <sub>4</sub>                   | B2            | 50.00         | >99         | 68.15       |
| leucine               | H <sub>2</sub> SO <sub>4</sub>                   | B3            | 53.92         | >99         | 71.26       |
| methionine            | H <sub>2</sub> SO <sub>4</sub>                   | Decomposition |               |             |             |
| alanine               | formic                                           | C1            | >99           | 92.44       | 86.59       |
| phenylalanine         | formic                                           | C2            | >99           | 88.97       | 79.29       |
| leucine               | formic                                           | C3            | >99           | 92.68       | 86.34       |
| methionine            | formic                                           | C4            | >99           | 87.40       | 82.45       |
| alanine               | HNO <sub>3</sub>                                 | unknown       | not selective |             |             |
| phenylalanine         | HNO <sub>3</sub>                                 | unknown       | not selective |             |             |
| leucine               | HNO <sub>3</sub>                                 | unknown       | not selective |             |             |
| methionine            | HNO <sub>3</sub>                                 | unknown       | not selective |             |             |
| alanine               | HCl                                              | unknown       | not selective |             |             |
| phenylalanine         | HCl                                              | unknown       | not selective |             |             |
| leucine               | HCl                                              | unknown       | not selective |             |             |
| methionine            | HCl                                              | unknown       | not selective |             |             |
| alanine               | FeCl <sub>3</sub>                                | unknown       | not selective |             |             |
| phenylalanine         | FeCl <sub>3</sub>                                | unknown       | not selective |             |             |
| leucine               | FeCl <sub>3</sub>                                | unknown       | not selective |             |             |
| methionine            | FeCl <sub>3</sub>                                | unknown       | not selective |             |             |
| alanine               | AlCl <sub>3</sub>                                | unknown       | not selective |             |             |
| phenylalanine         | AlCl <sub>3</sub>                                | unknown       | not selective |             |             |
| leucine               | AlCl <sub>3</sub>                                | unknown       | not selective |             |             |
| methionine            | AlCl <sub>3</sub>                                | unknown       | not selective |             |             |
| alanine               | H <sub>2</sub> SO <sub>4</sub> -SiO <sub>2</sub> | unknown       | not selective |             |             |
| phenylalanine         | H <sub>2</sub> SO <sub>4</sub> -SiO <sub>2</sub> | unknown       | not selective |             |             |
| leucine               | H <sub>2</sub> SO <sub>4</sub> -SiO <sub>2</sub> | unknown       | not selective |             |             |
| methionine            | H <sub>2</sub> SO <sub>4</sub> -SiO <sub>2</sub> | unknown       | not selective |             |             |
| alanine               | HClO <sub>4</sub> -SiO <sub>2</sub>              | unknown       | not selective |             |             |
| phenylalanine         | HClO <sub>4</sub> -SiO <sub>2</sub>              | unknown       | not selective |             |             |
| leucine               | HClO <sub>4</sub> -SiO <sub>2</sub>              | unknown       | not selective |             |             |
| methionine            | HClO <sub>4</sub> -SiO <sub>2</sub>              | unknown       | not selective |             |             |

The products of reaction of amino acids with DMC in the acid catalyzed.

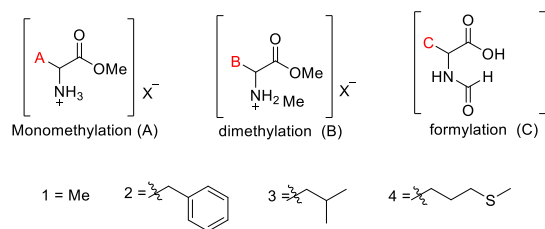

**Table S6** Optical rotation experiment in EtOH

| Substrate    | Optical rotation of substrate    | Optical rotation of product      |                                          |                                  |
|--------------|----------------------------------|----------------------------------|------------------------------------------|----------------------------------|
|              |                                  | HClO <sub>4</sub> condition      | H <sub>2</sub> SO <sub>4</sub> condition | HCO <sub>2</sub> H condition     |
| L-alanine    | [α] <sup>27</sup> +62.90 (c 0.6) | [α] <sup>27</sup> +35.65 (c 0.6) | [α] <sup>27</sup> +29.97 (c 0.6)         | [α] <sup>27</sup> +24.11 (c 0.5) |
| L-leucine    | [α] <sup>27</sup> +8.31 (c 0.25) | [α] <sup>27</sup> +47.55 (c 1.0) | [α] <sup>27</sup> +26.54 (c 0.3)         | [α] <sup>27</sup> +13.65 (c 0.8) |
| L-proline    | [α] <sup>27</sup> +19.39 (c 1.0) | [α] <sup>27</sup> +47.55 (c 1.0) | [α] <sup>27</sup> +25.18 (c 0.5)         | [α] <sup>27</sup> +9.03 (c 0.5)  |
| L-histidine  | [α] <sup>27</sup> +19.39 (c 1.0) | [α] <sup>27</sup> +10.12 (c 0.8) | -                                        | [α] <sup>27</sup> +22.81 (c 1.0) |
| L-tyrosine   | [α] <sup>27</sup> +31.1 (c 1.0)  | [α] <sup>27</sup> +78.14 (c 0.6) | [α] <sup>27</sup> +40.37 (c 0.6)         | [α] <sup>27</sup> +72.18 (c 0.7) |
| L-glutamine  | [α] <sup>27</sup> +42.15 (c 0.7) | [α] <sup>27</sup> +32.80 (c 1.0) | -                                        | [α] <sup>27</sup> +40.56 (c 0.7) |
| L-tryptophan | [α] <sup>27</sup> +44.43 (c 0.6) | [α] <sup>27</sup> +110.2 (c 1.0) | [α] <sup>27</sup> +34.86 (c 0.2)         | [α] <sup>27</sup> +72.71 (c 0.7) |

## 2. Characterization of structures of products

DL-alanine methyl ester.  $^1\text{H-NMR}$  ( $\text{CD}_3\text{OD}$ ):  $\delta$  4.13-4.08 (q, 1H), 3.82 (s, 3H), 1.53-1.51 (d, 3H);  $^{13}\text{C-NMR}$  ( $\text{CD}_3\text{OD}$ ):  $\delta$  170.08, 52.50, 48.64, 14.90.

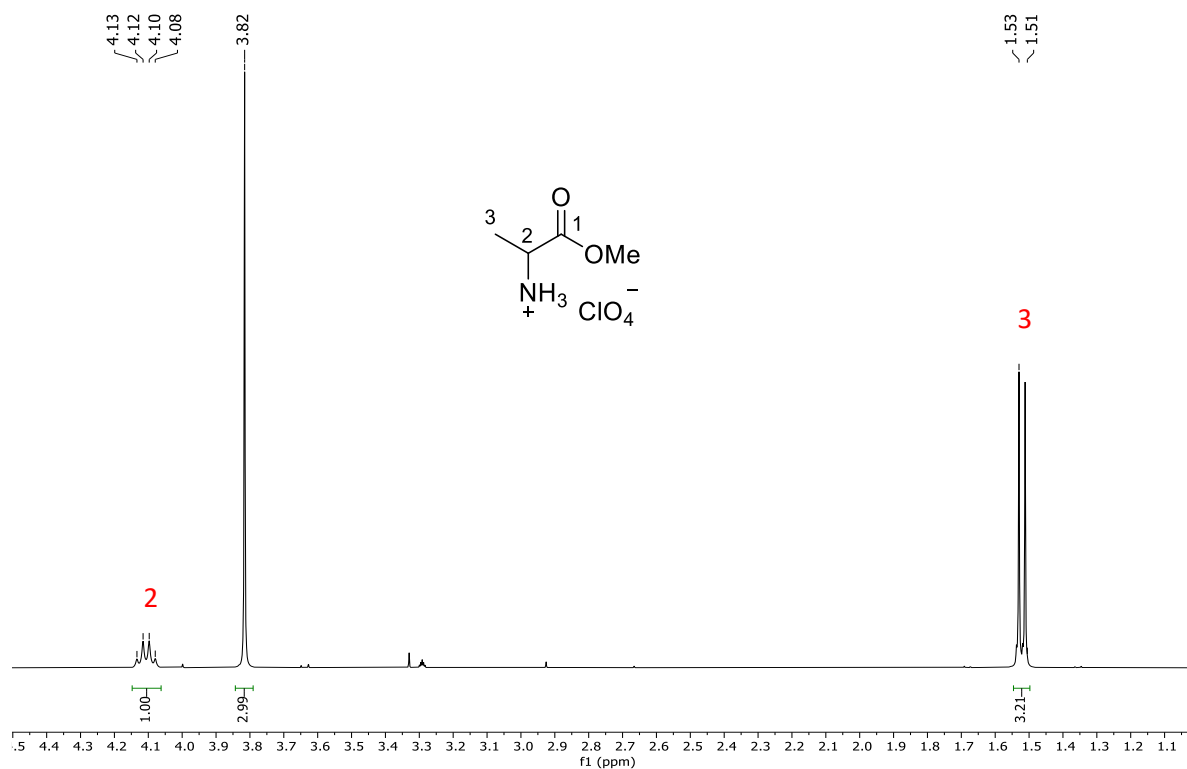

Figure S1.  $^1\text{H}$  NMR of DL-alanine methyl ester in  $\text{CD}_3\text{OD}$

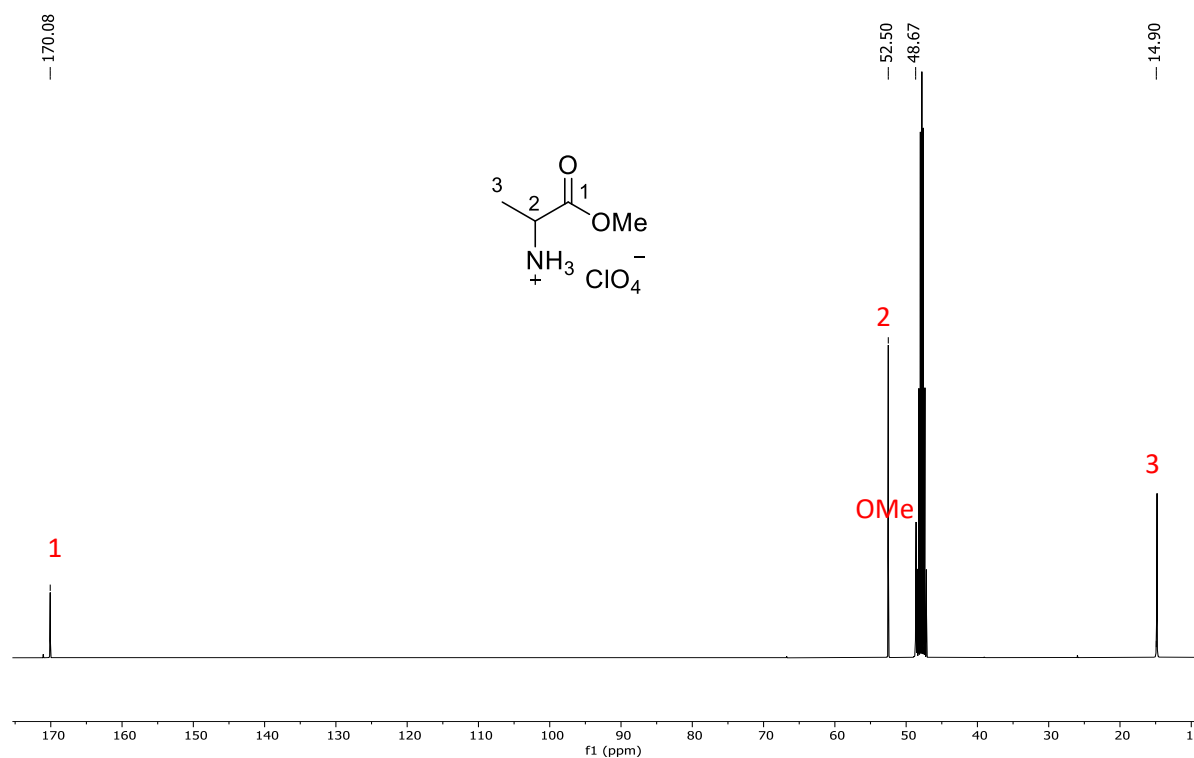

Figure S2.  $^{13}\text{C}$  NMR of DL-alanine methyl ester in  $\text{CD}_3\text{OD}$

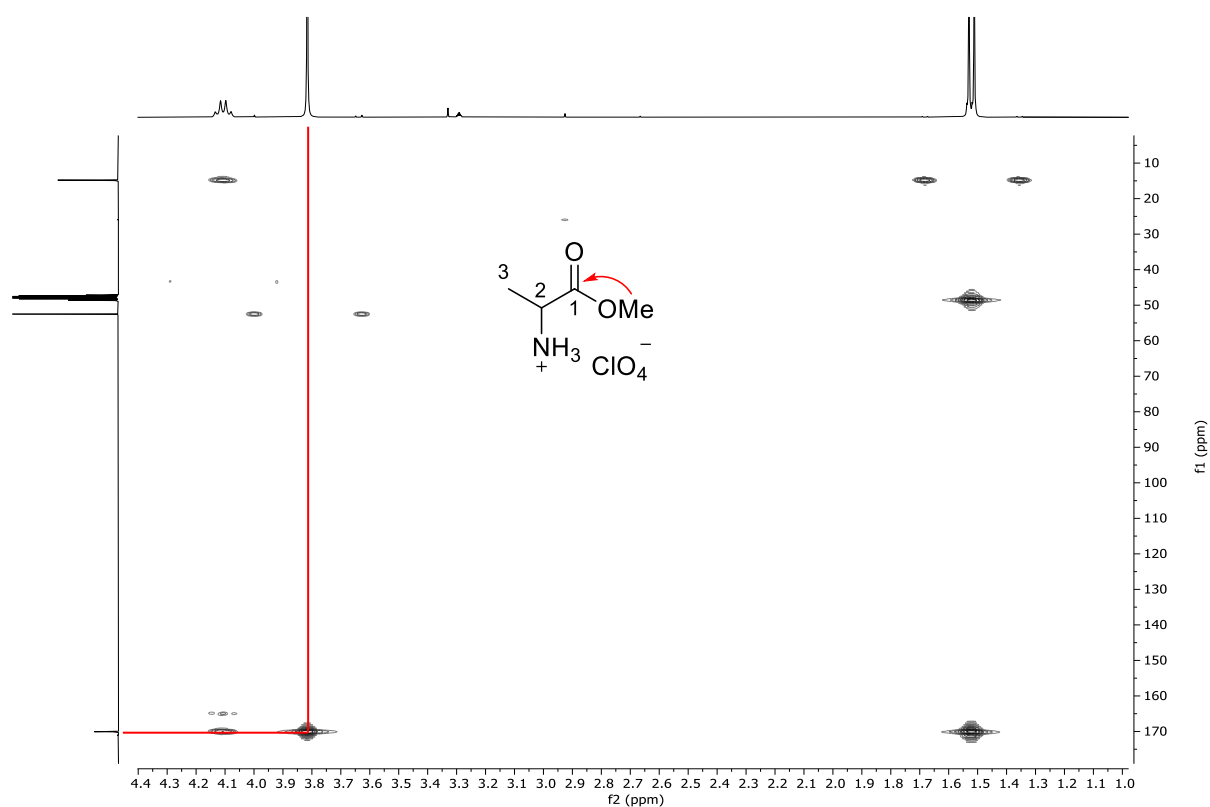

**Figure S3.** HMBC of DL-alanine methyl ester in  $\text{CD}_3\text{OD}$

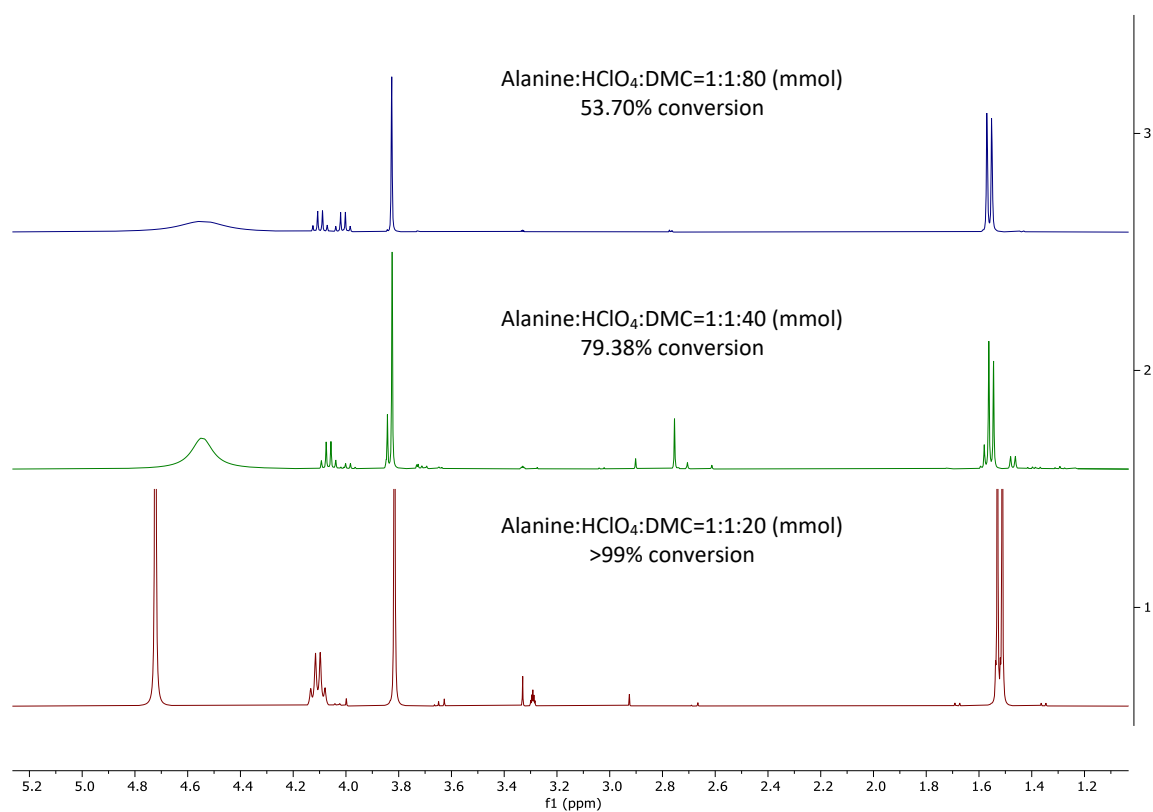

**Figure S4.** Compare the effect DMC assisted by  $\text{HClO}_4$  in the reaction of alanine

DL-phenylalanine methyl ester.  $^1\text{H}$ -NMR ( $\text{DMSO-}d_6 + \text{CD}_3\text{OD}$ ):  $\delta$  7.44-7.30 (m, 5H), 4.40-4.35 (t, 1H), 3.75 (s, 3H), 3.24-3.12 (m, 2H);  $^{13}\text{C}$ -NMR ( $\text{DMSO-}d_6 + \text{CDCl}_3$ ):  $\delta$  169.65, 134.32, 129.82, 129.34, 54.46, 53.45, 36.57.

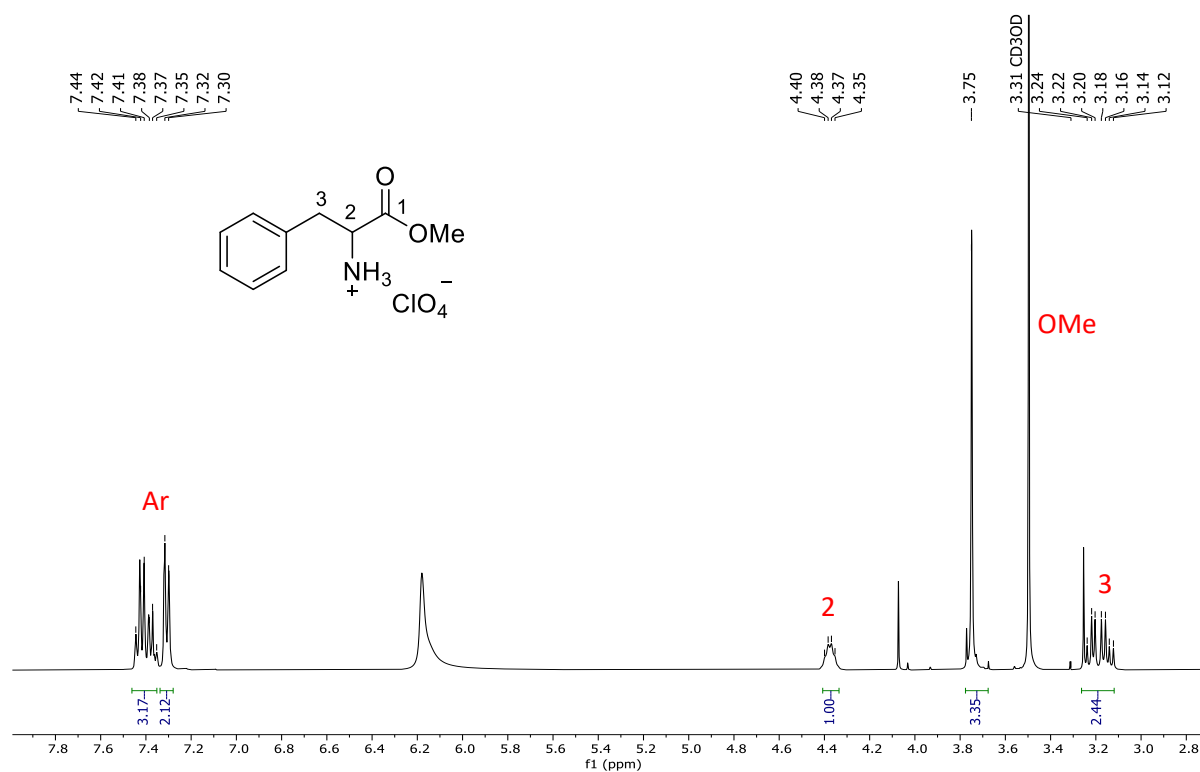

**Figure S5.**  $^1\text{H}$  NMR of DL-phenylalanine methyl ester in  $\text{DMSO-}d_6 + \text{CD}_3\text{OD}$

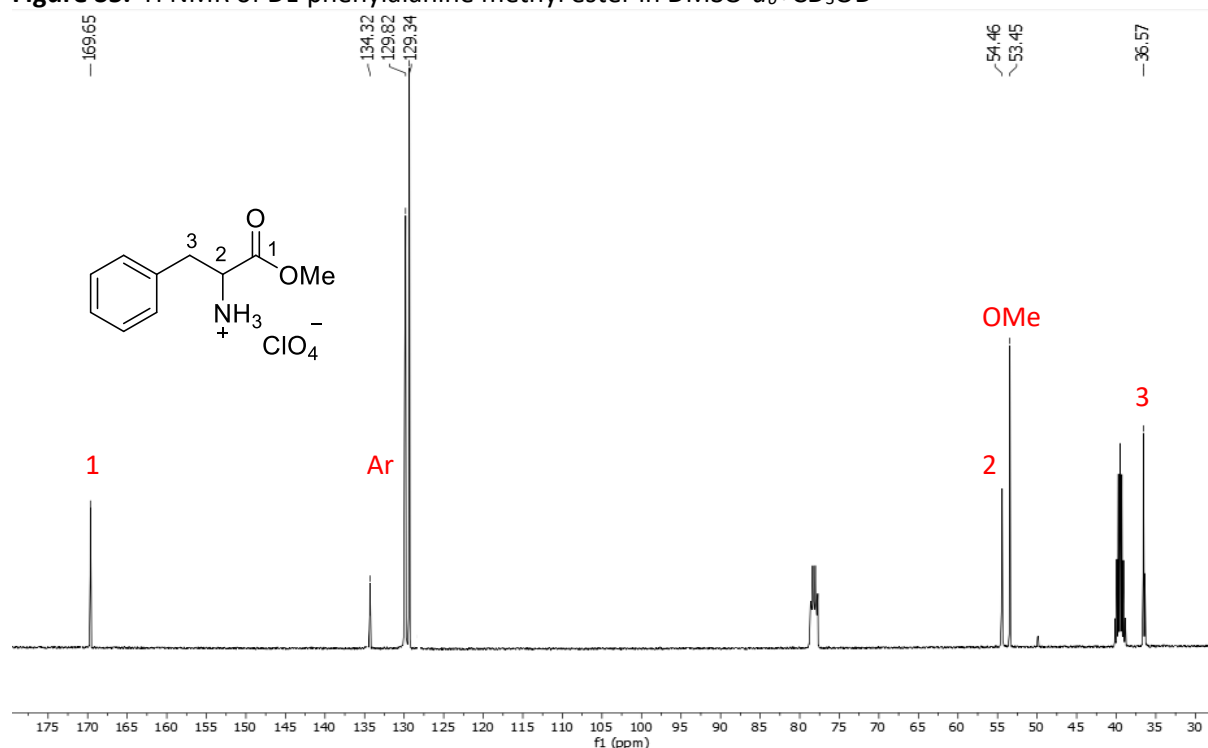

**Figure S6.**  $^{13}\text{C}$  NMR of DL-phenylalanine methyl ester in  $\text{DMSO-}d_6 + \text{CDCl}_3$

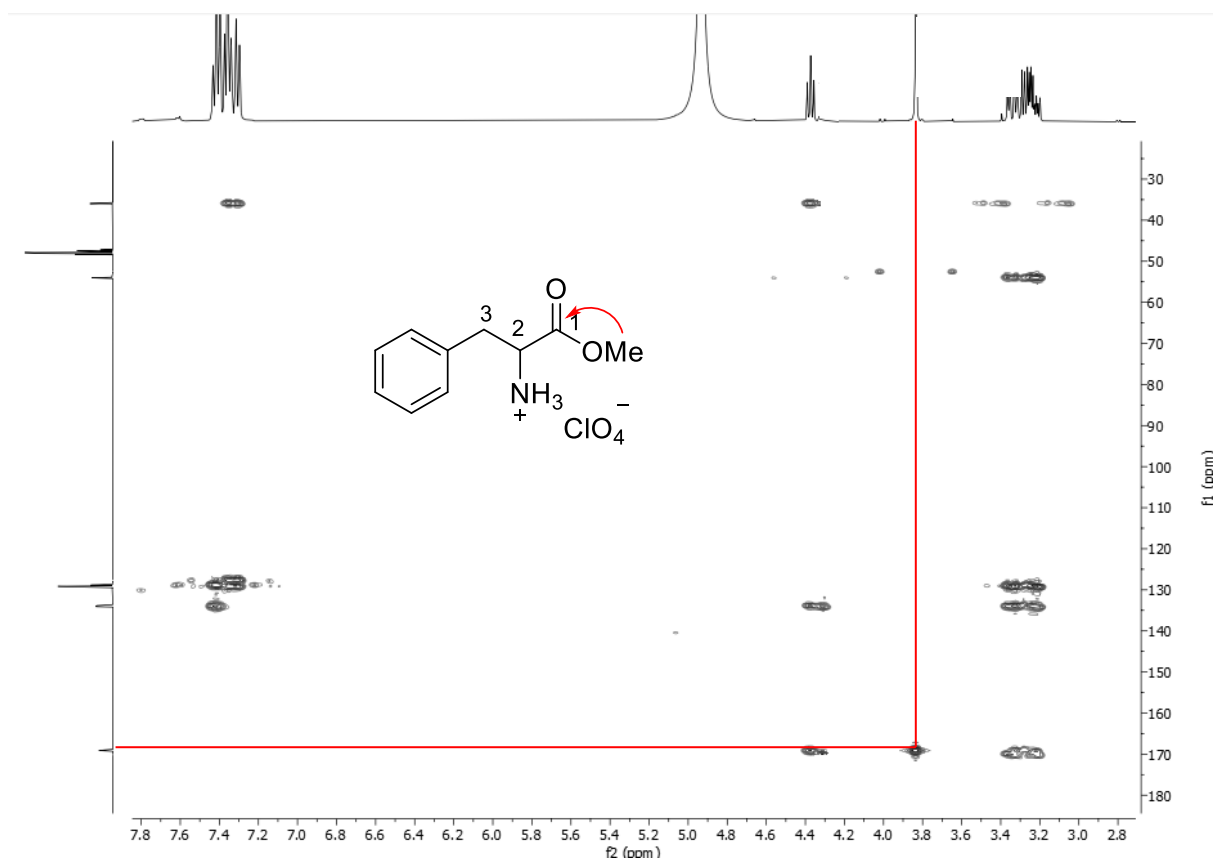

**Figure S7.** HMBC of DL- phenylalanine in  $\text{CD}_3\text{OD}$

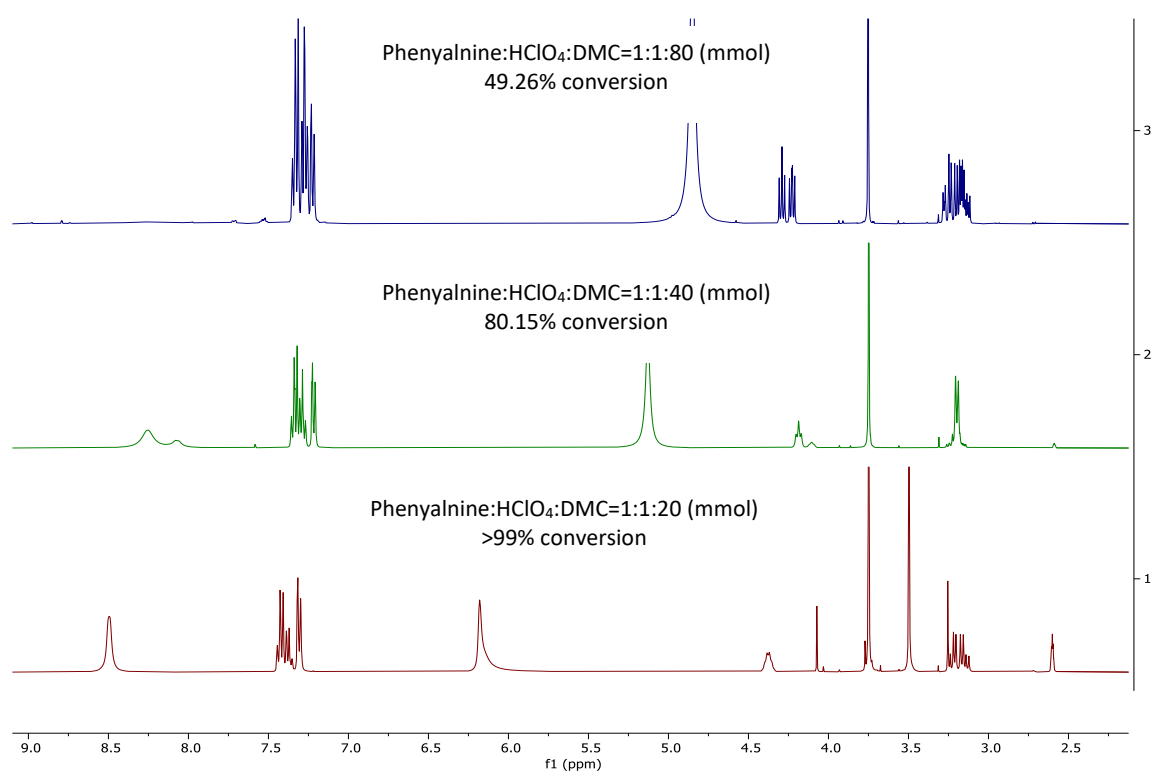

**Figure S8.** Compare the effect DMC assisted by  $\text{HClO}_4$  in the reaction of phenylalanine

DL-leucine methyl ester.  $^1\text{H-NMR}$  ( $\text{CD}_3\text{OD}+\text{CDCl}_3$ ):  $\delta$  4.01 (t, 1H), 3.77 (s, 3H), 1.76-1.67 (m, 3H), 1.65 (m, 2H), 0.94 (m, 6H);  $^{13}\text{C-NMR}$  ( $\text{CD}_3\text{OD}+\text{CDCl}_3$ ):  $\delta$  170.24, 53.29, 51.70, 39.28, 24.17, 21.81, 21.52.

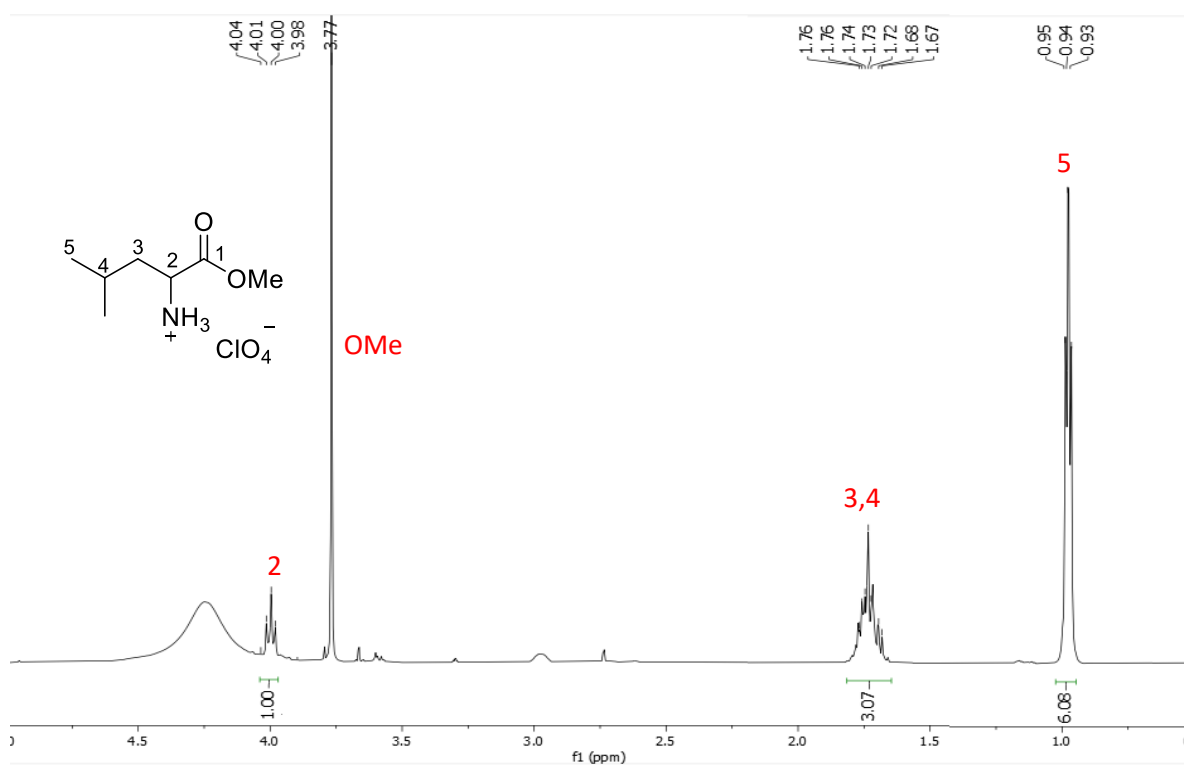

**Figure S9.**  $^1\text{H}$  NMR of DL-leucine methyl ester in  $\text{CD}_3\text{OD}+\text{CDCl}_3$

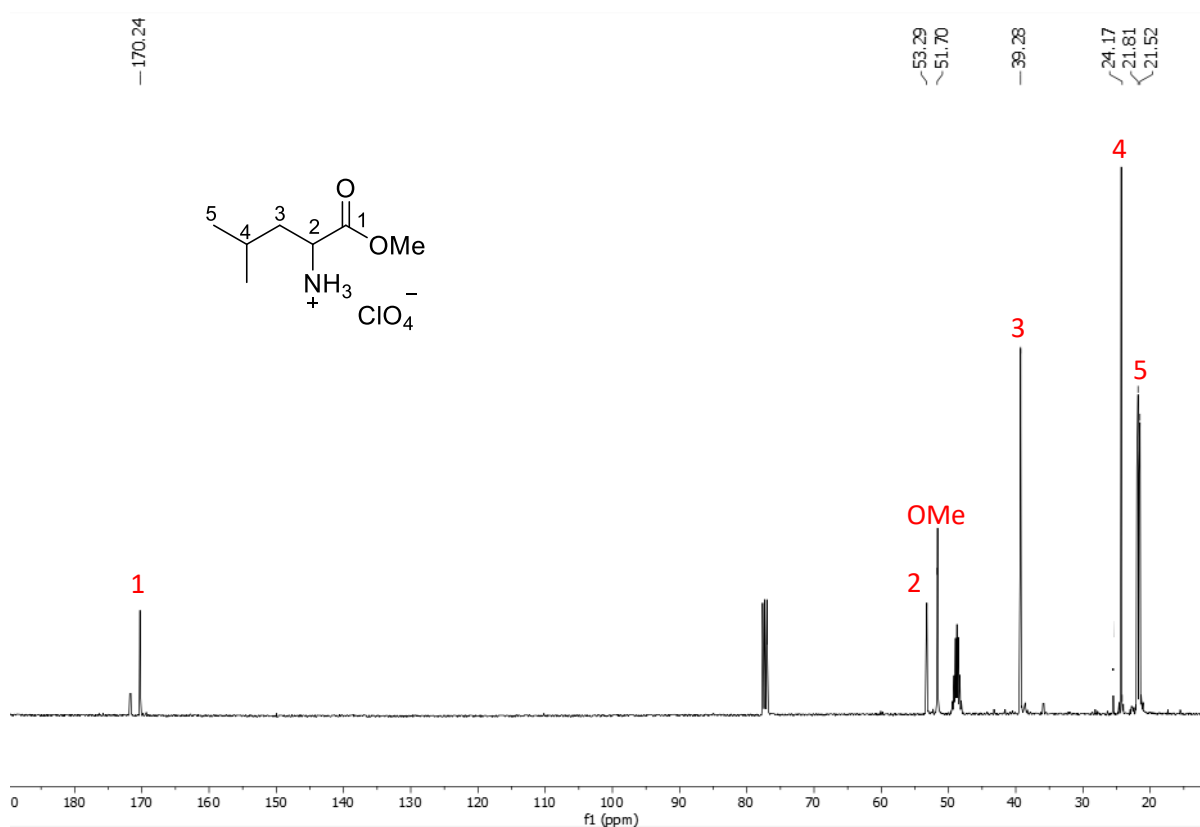

**Figure S10.**  $^{13}\text{C}$  NMR of DL-leucine methyl ester in  $\text{CD}_3\text{OD}+\text{CDCl}_3$

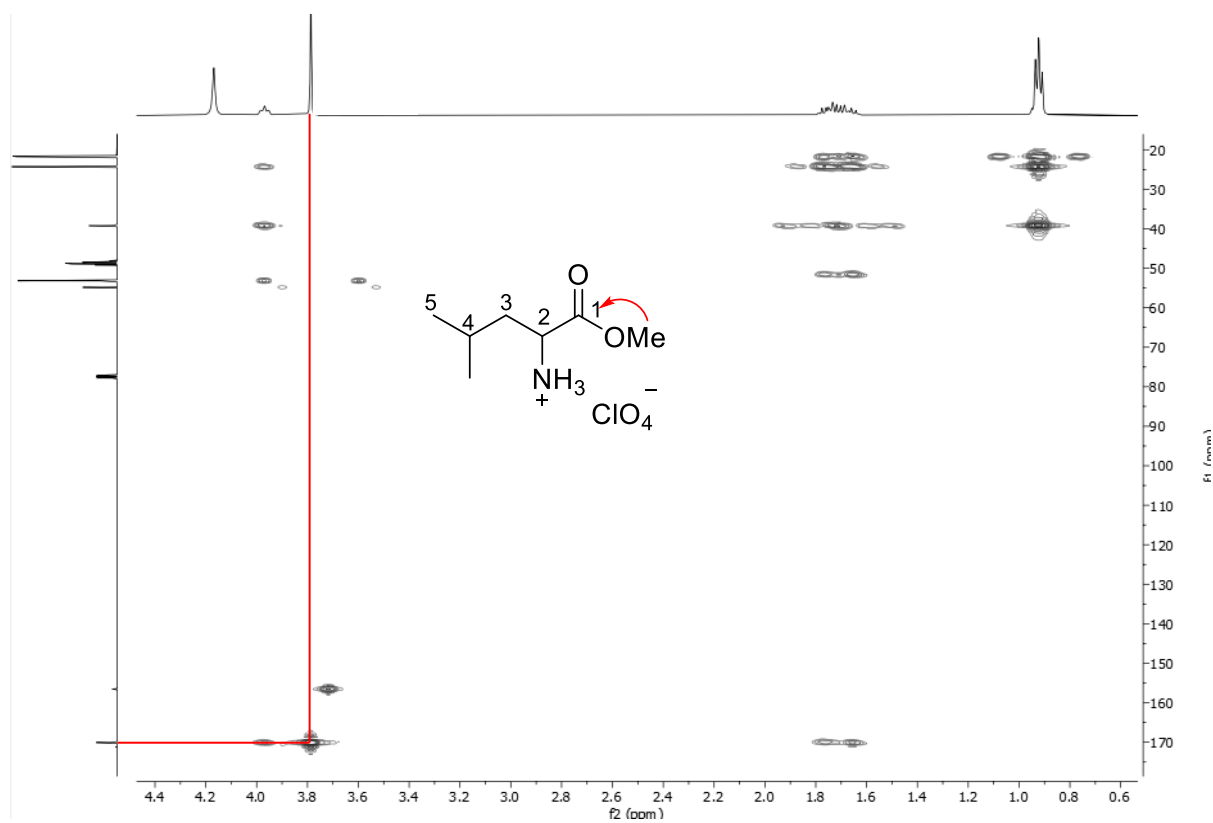

**Figure S11.** HMBC of DL- leucine methyl ester in  $\text{CD}_3\text{OD}$

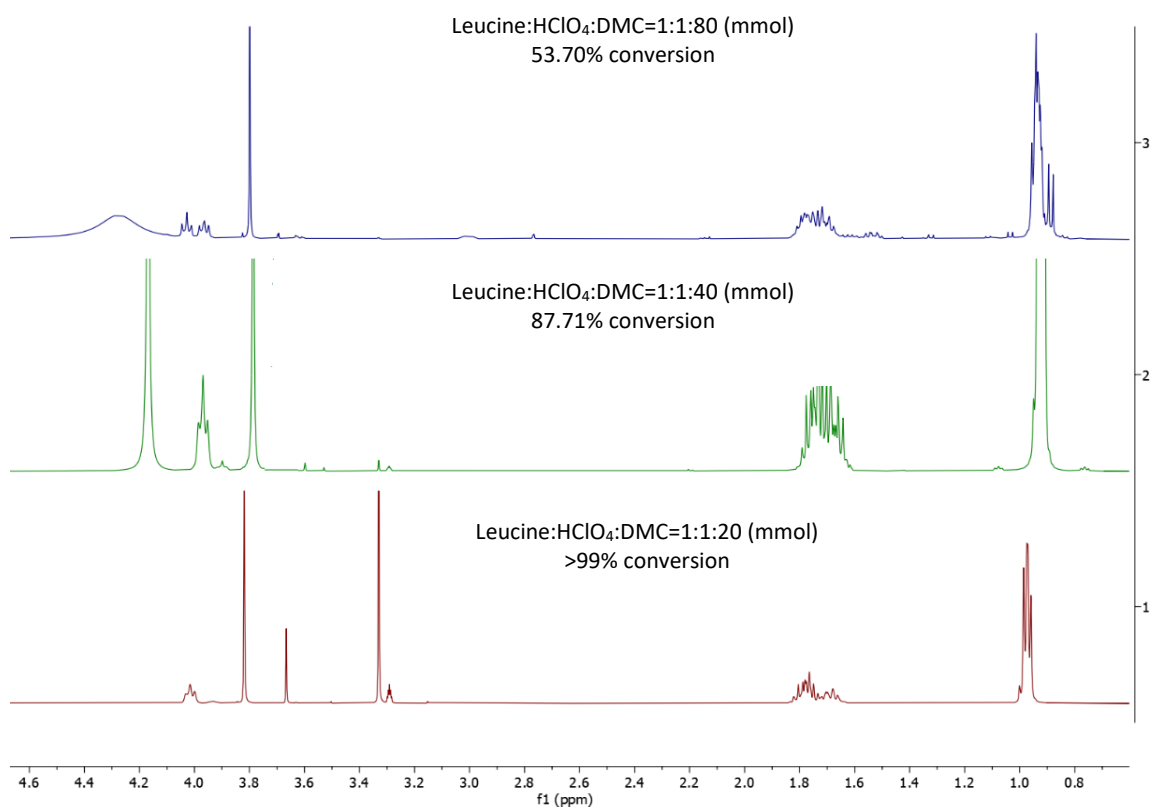

**Figure S12.** Compare the effect DMC assisted by  $\text{HClO}_4$  in the reaction of leucine

DL-*N*-methyl alanine methyl ester ammonium.  $^1\text{H}$ -NMR ( $\text{CD}_3\text{OD}$ ):  $\delta$  4.12-4.07 (q, 1H), 3.82 (s, 3H), 3.67 (s, 3H), 1.54-1.53 (d, 3H);  $^{13}\text{C}$ -NMR ( $\text{CD}_3\text{OD}+\text{CDCl}_3$ ):  $\delta$  170.37, 54.77, 53.13, 48.84, 15.46.

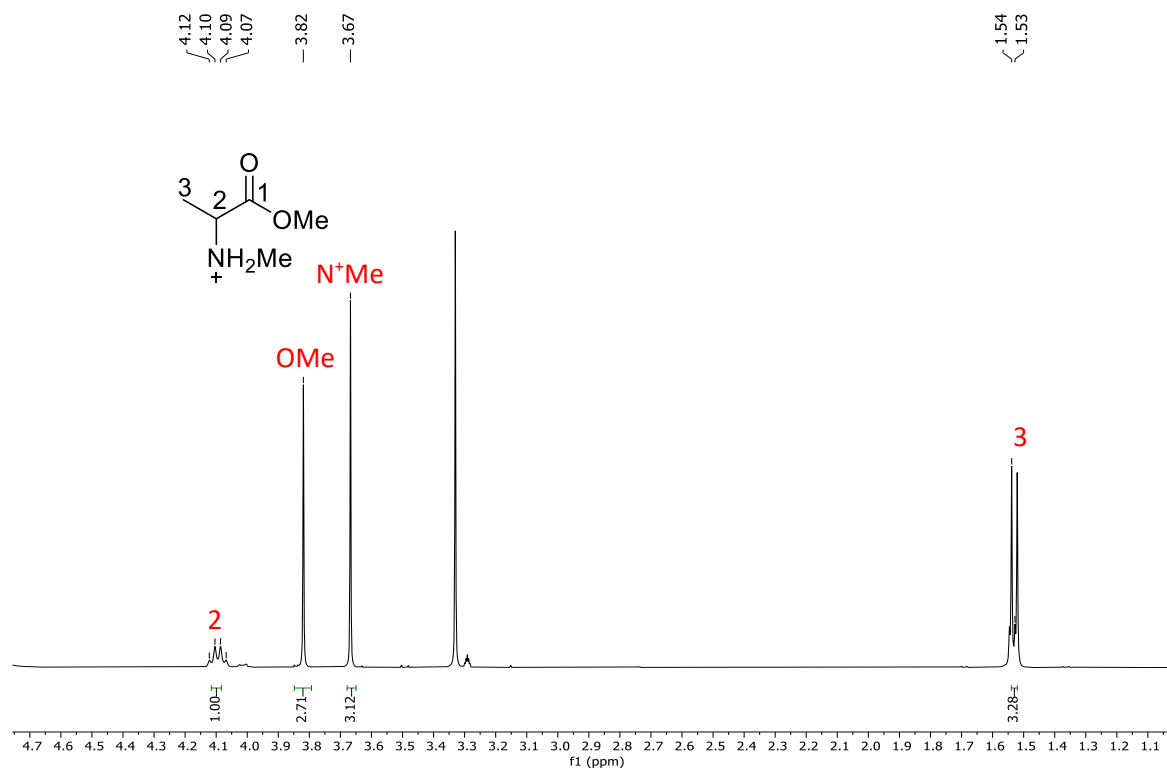

**Figure S13.**  $^1\text{H}$  NMR of DL-*N*-methyl alanine methyl ester ammonium in  $\text{CD}_3\text{OD}+\text{CDCl}_3$

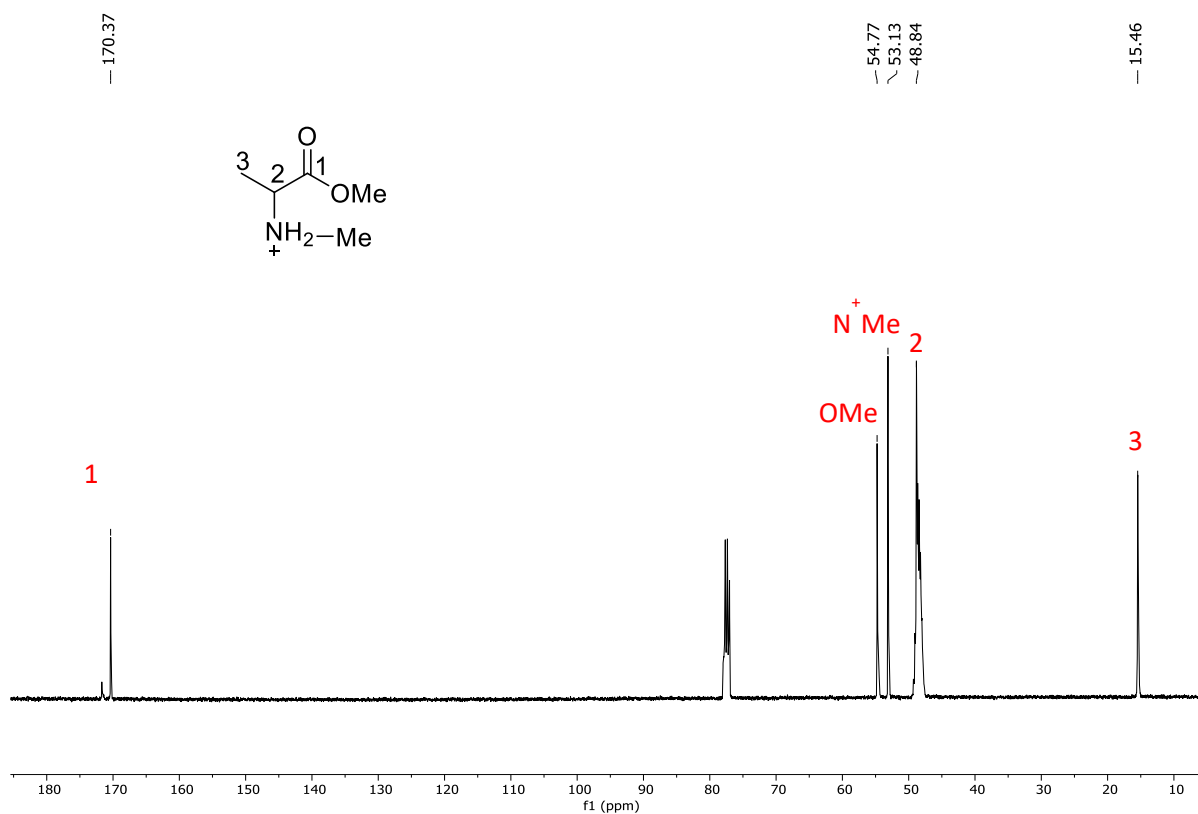

**Figure S14.**  $^{13}\text{C}$  NMR of DL-*N*-methyl alanine methyl ester ammonium in  $\text{CD}_3\text{OD}+\text{CDCl}_3$

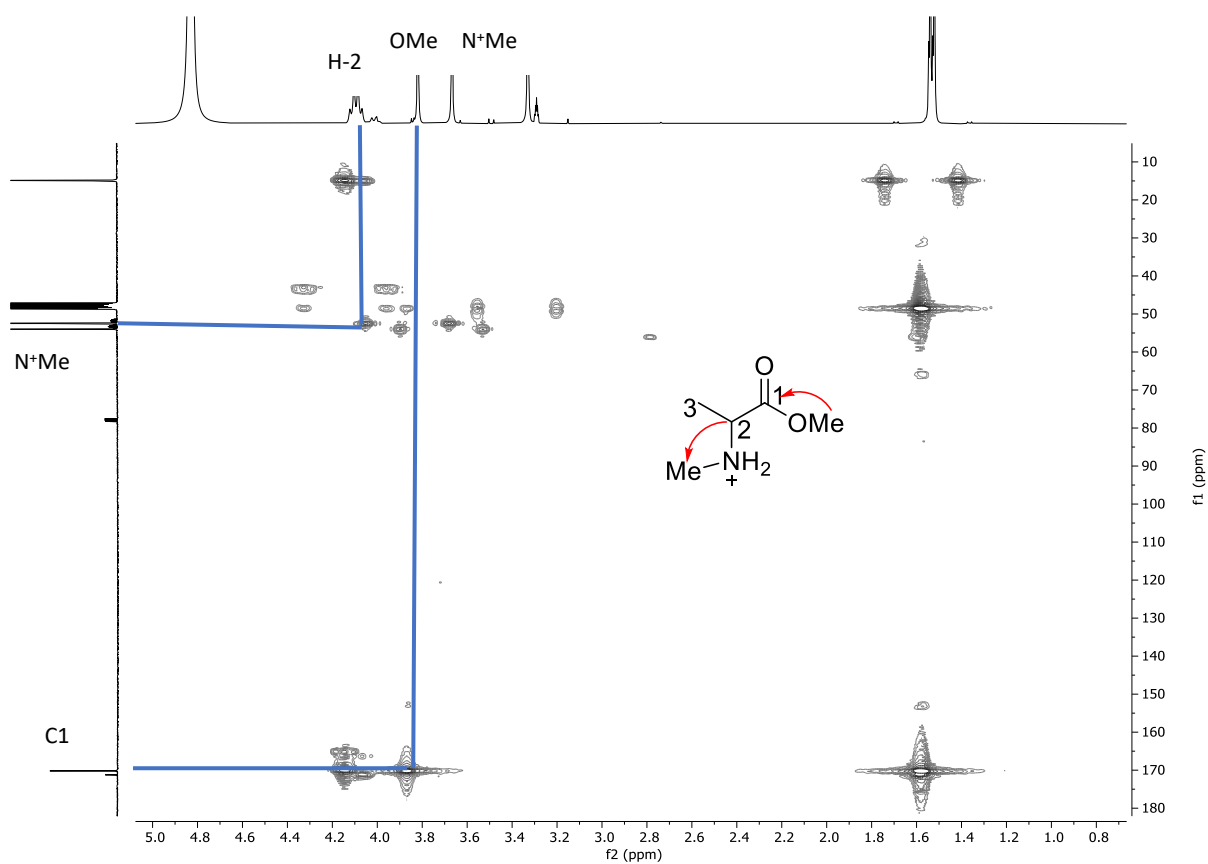

**Figure S15.** HMBC of DL-N-methyl alanine methyl ester ammonium in  $\text{CD}_3\text{OD}$

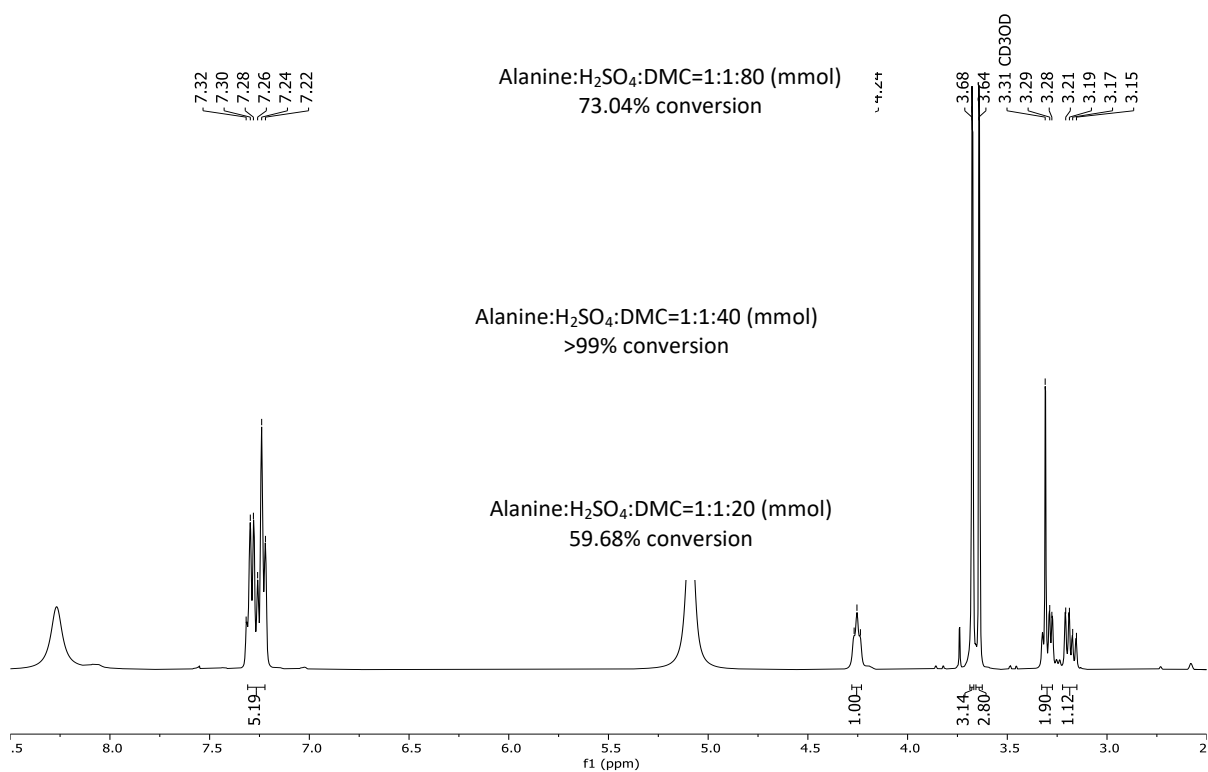

**Figure S16.** Compare the effect DMC assisted by  $\text{H}_2\text{SO}_4$  in the reaction of alanine

DL-*N*-methyl phenylalanine methyl ester ammonium.  $^1\text{H-NMR}$  ( $\text{CD}_3\text{OD}+\text{DMSO-}d_6$ ):  $\delta$  7.32-7.22 (m, 5H), 4.27 (t, 1H), 3.67 (s, 3H), 3.64 (s, 3H), 3.29-1.15 (m, 2H);  $^{13}\text{C-NMR}$  ( $\text{CD}_3\text{OD}+\text{DMSO-}d_6$ ):  $\delta$  169.55, 134.82, 129.92, 128.79, 127.65, 55.03, 54.37, 53.06, 36.48.

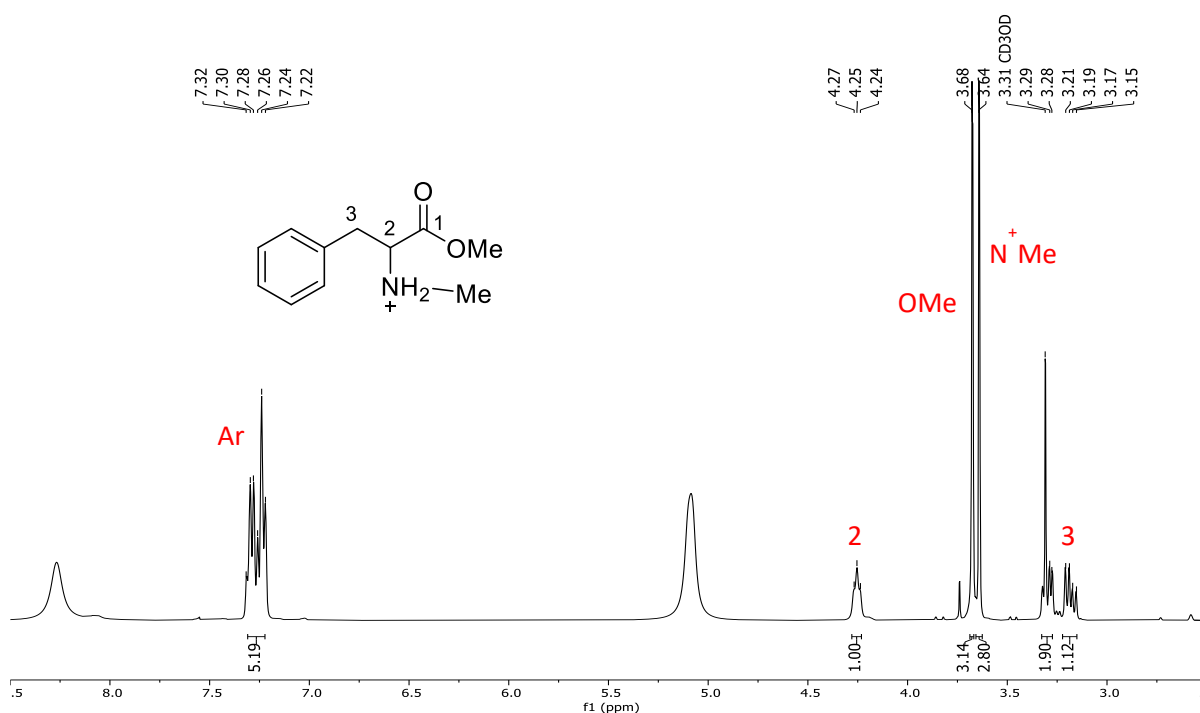

**Figure S17.**  $^1\text{H-NMR}$  of DL-*N*-methyl phenylalanine methyl ester ammonium in  $\text{CDCl}_3+\text{DMSO-}d_6$

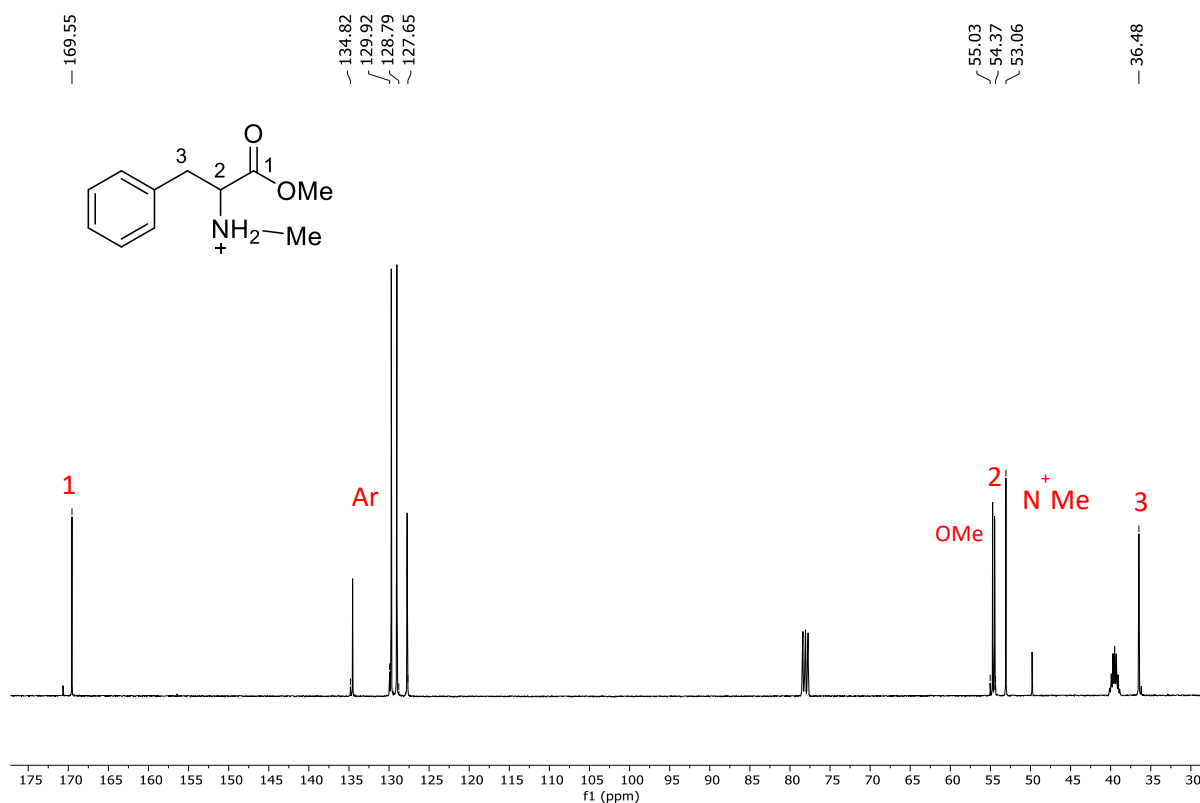

**Figure S18.**  $^{13}\text{C-NMR}$  of DL-*N*-methyl phenylalanine methyl ester ammonium in  $\text{CDCl}_3+\text{DMSO-}d_6$

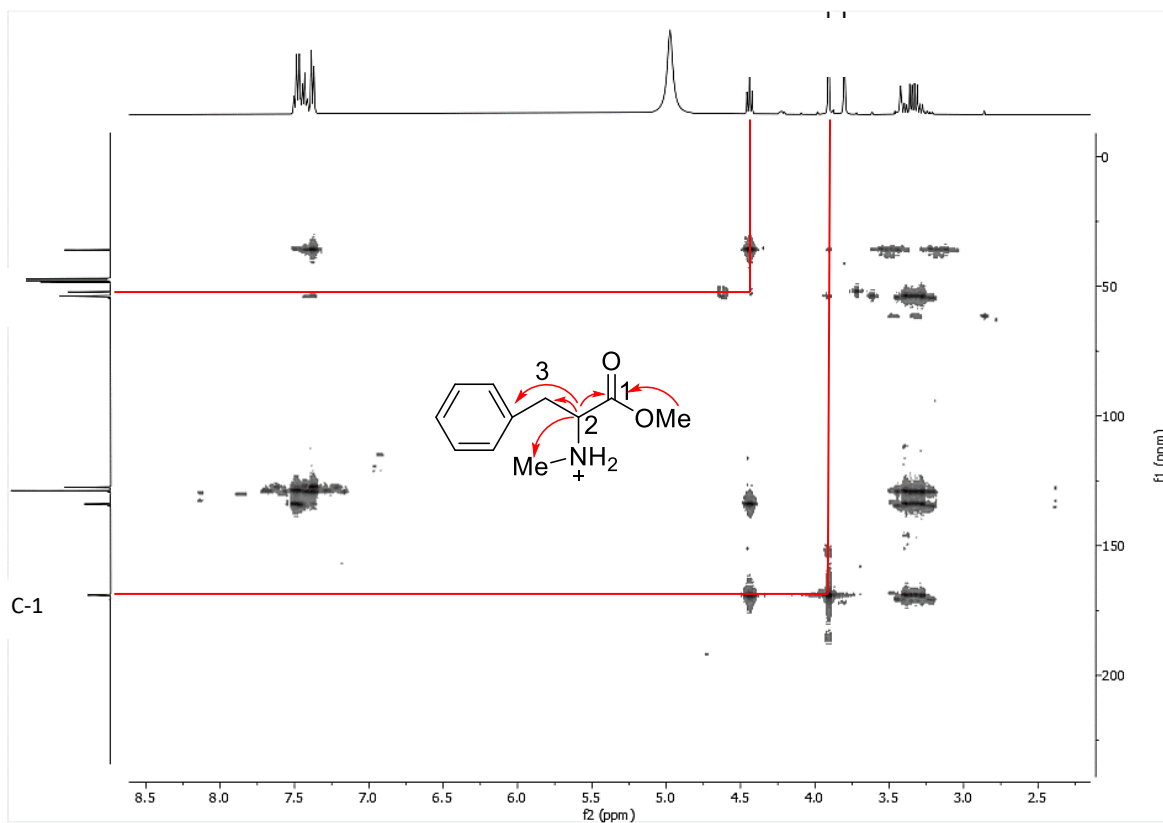

**Figure S19.** HMBC of DL-N-methyl phenylalanine methyl ester ammonium in CD<sub>3</sub>OD

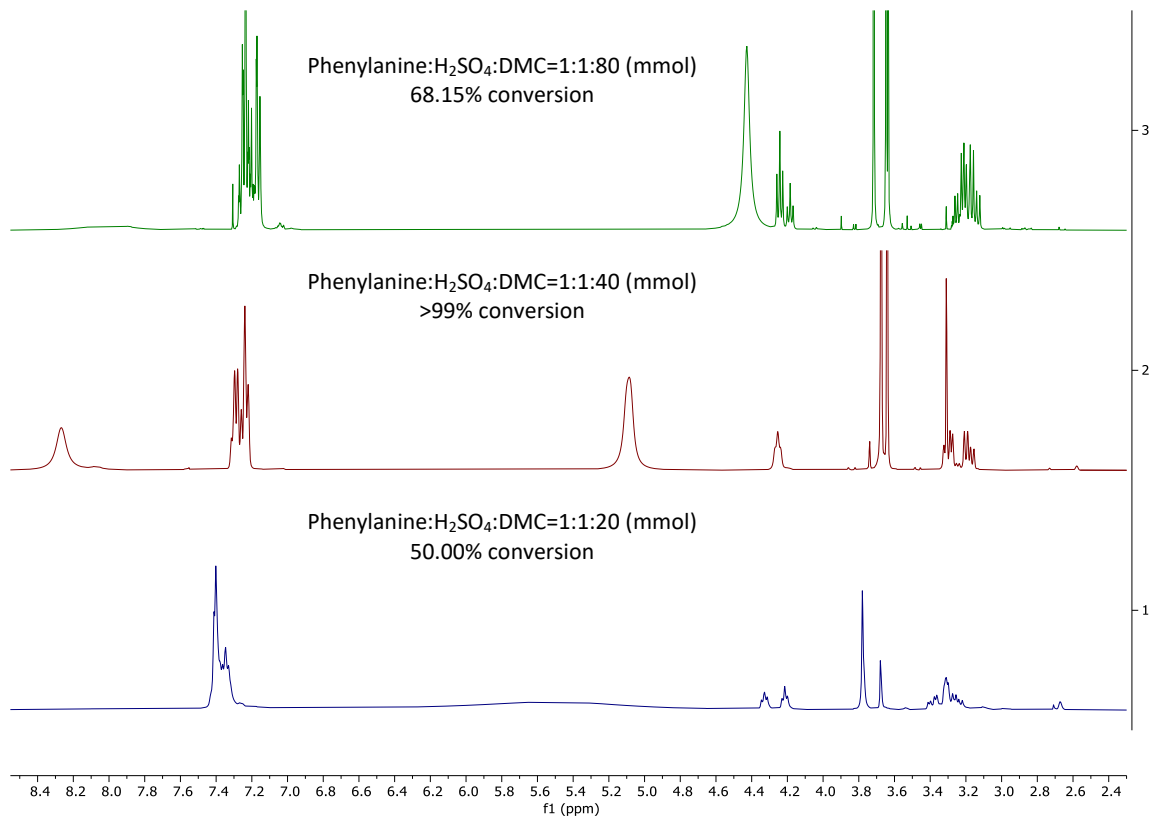

**Figure S20.** Compare the effect DMC assisted by H<sub>2</sub>SO<sub>4</sub> in the reaction of phenylalanine

DL-*N*-methyl leucine methyl ester ammonium.  $^1\text{H-NMR}$  ( $\text{CD}_3\text{OD}+\text{CDCl}_3$ ):  $\delta$  3.90-3.86 (t, 1H), 3.732 (s, 3H), 3.60 (s, 3H), 1.69-1.61 (m, 3H), 0.87-0.84 (m, 6H);  $^{13}\text{C-NMR}$  ( $\text{CD}_3\text{OD}+\text{CDCl}_3$ ):  $\delta$  170.31, 54.81, 52.90, 51.43, 24.28, 21.81.

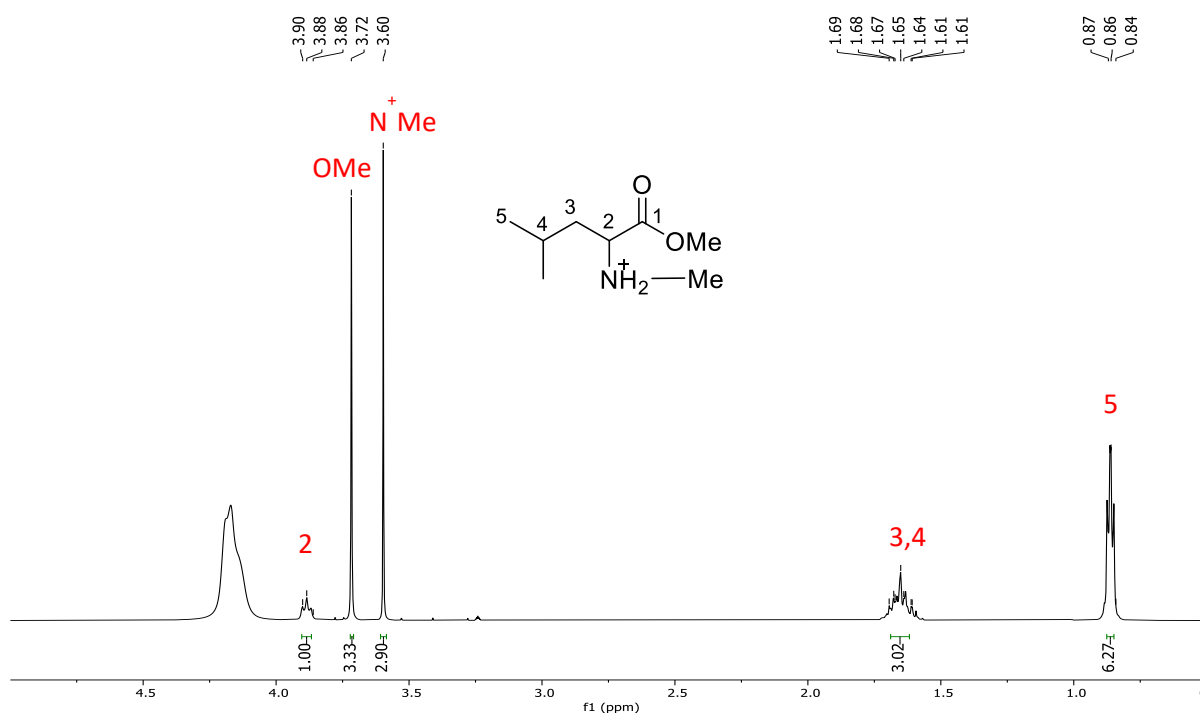

**Figure S21.**  $^1\text{H-NMR}$  of DL-*N*-methyl leucine methyl ester ammonium in  $\text{CD}_3\text{OD}+\text{CDCl}_3$

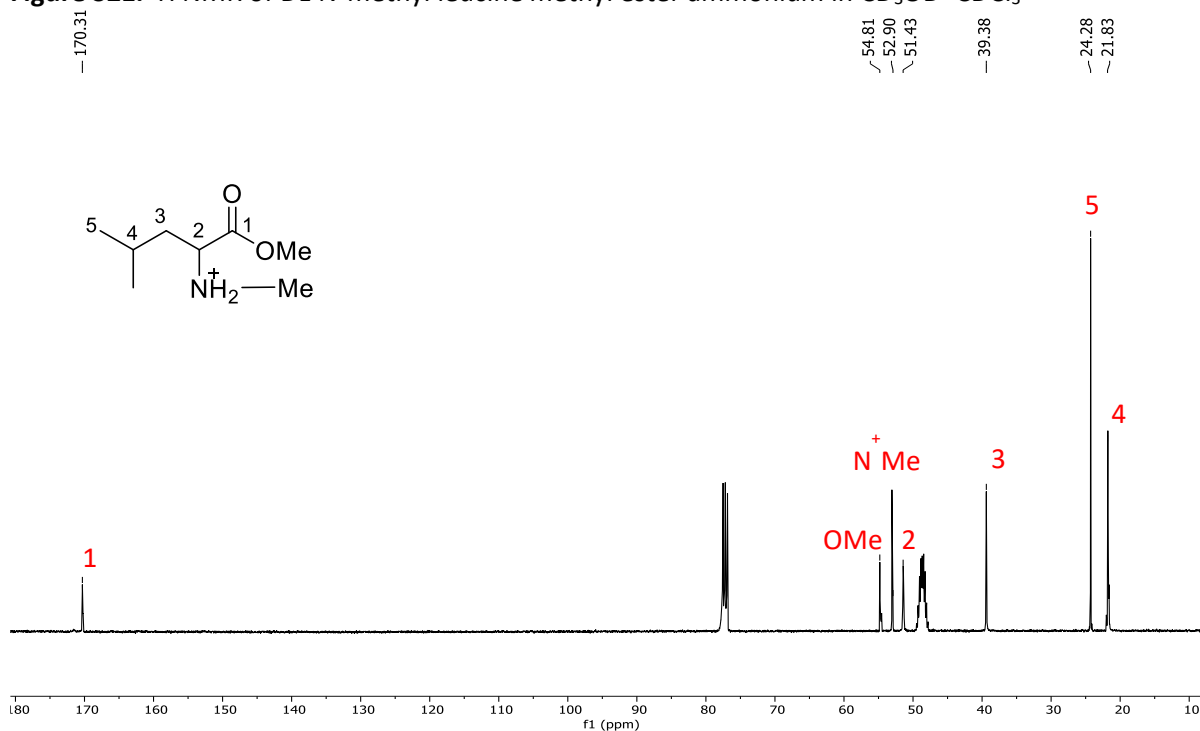

**Figure S22.**  $^{13}\text{C-NMR}$  of DL-*N*-methyl leucine methyl ester ammonium in  $\text{CD}_3\text{OD}+\text{CDCl}_3$

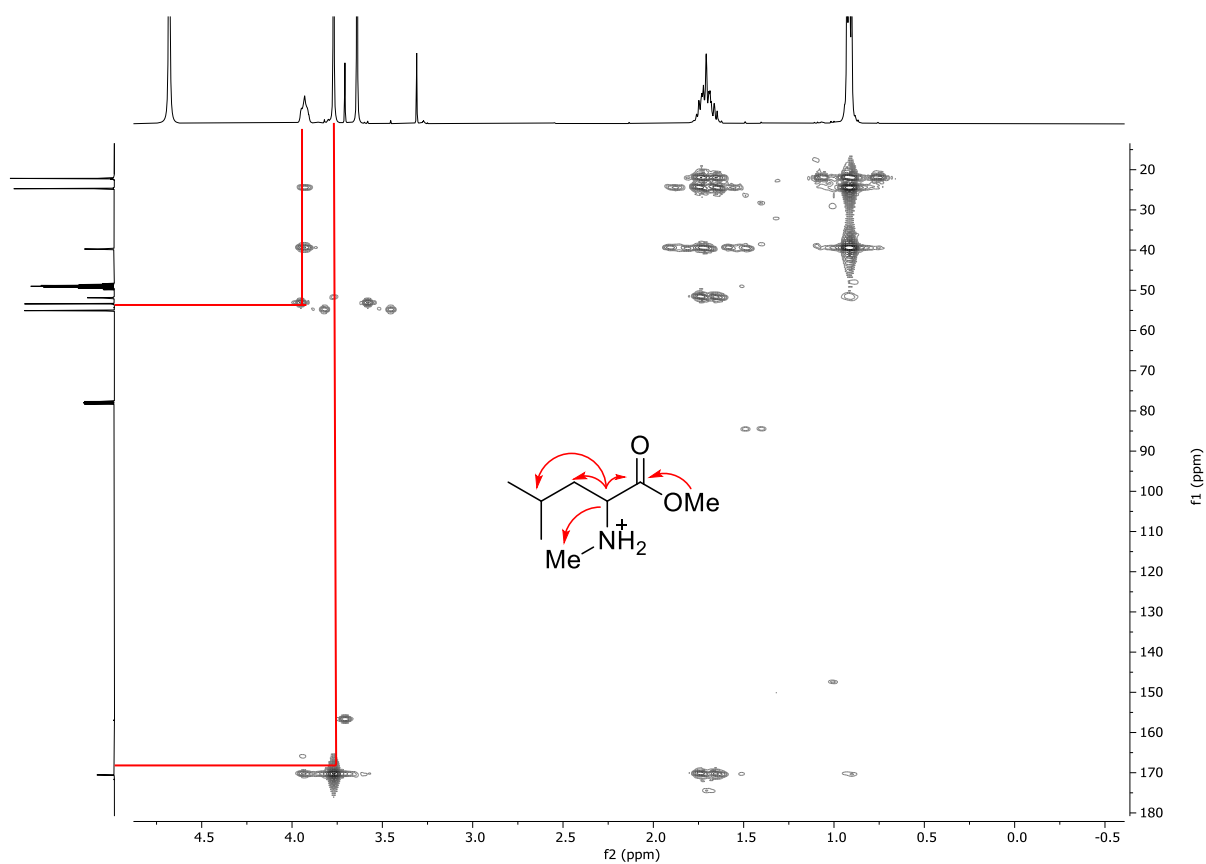

**Figure S23.** HMBC of DL-N-methyl leucine methyl ester ammonium in CD<sub>3</sub>OD

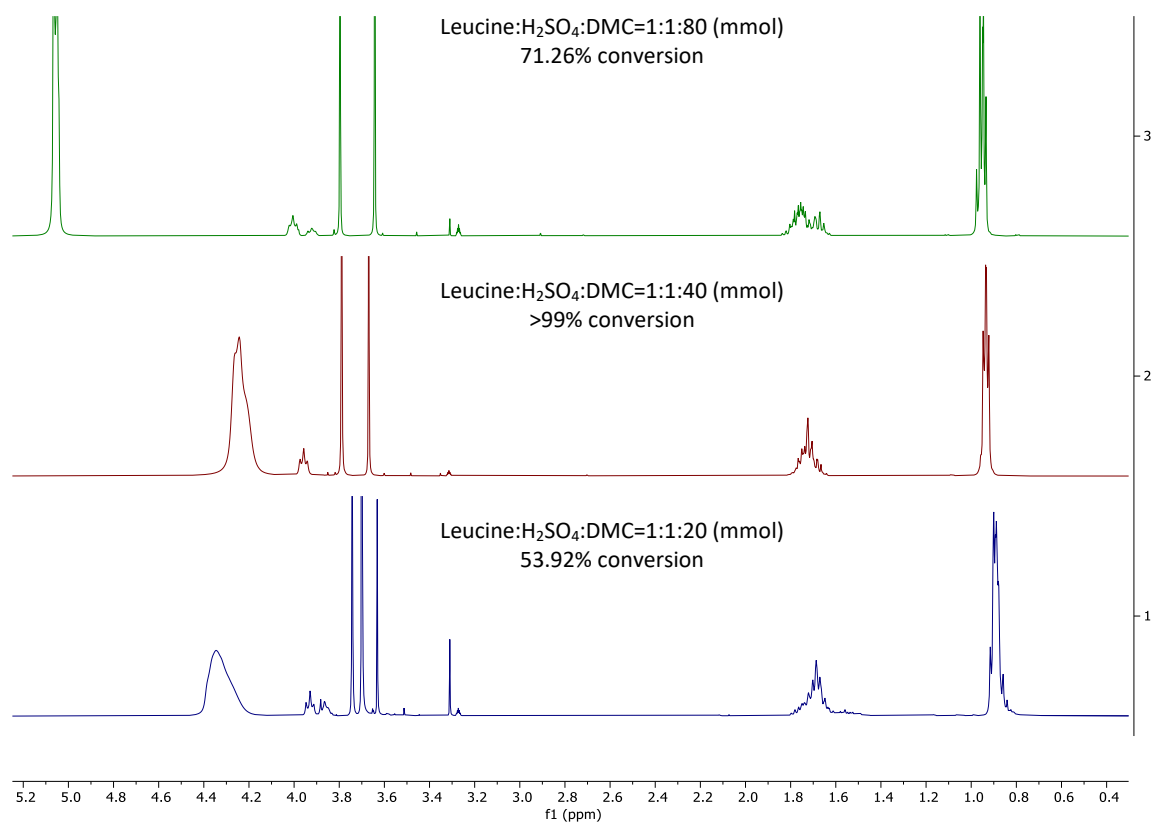

**Figure S24.** Compare the effect DMC assisted by H<sub>2</sub>SO<sub>4</sub> in the reaction of leucine

DL- formylalanine.  $^1\text{H}$ -NMR ( $\text{CD}_3\text{OD}+\text{CDCl}_3$ ):  $\delta$  8.08 (s, 1H), 4.54-4.47 (t, 1H), 1.44-1.29 (d, 3H);  $^{13}\text{C}$ -NMR ( $\text{CD}_3\text{OD}+\text{CDCl}_3$ ):  $\delta$  174.31, 162.03, 46.76, 17.02.

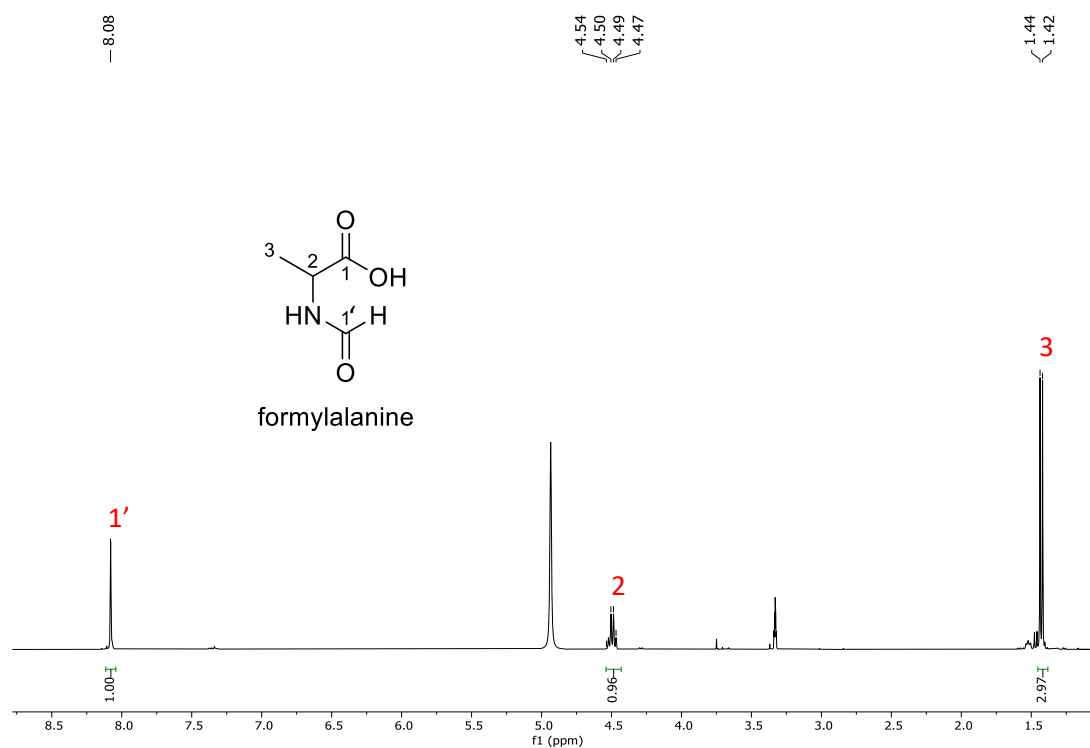

Figure S25.  $^1\text{H}$  NMR of DL- formylalanine in  $\text{CD}_3\text{OD}$

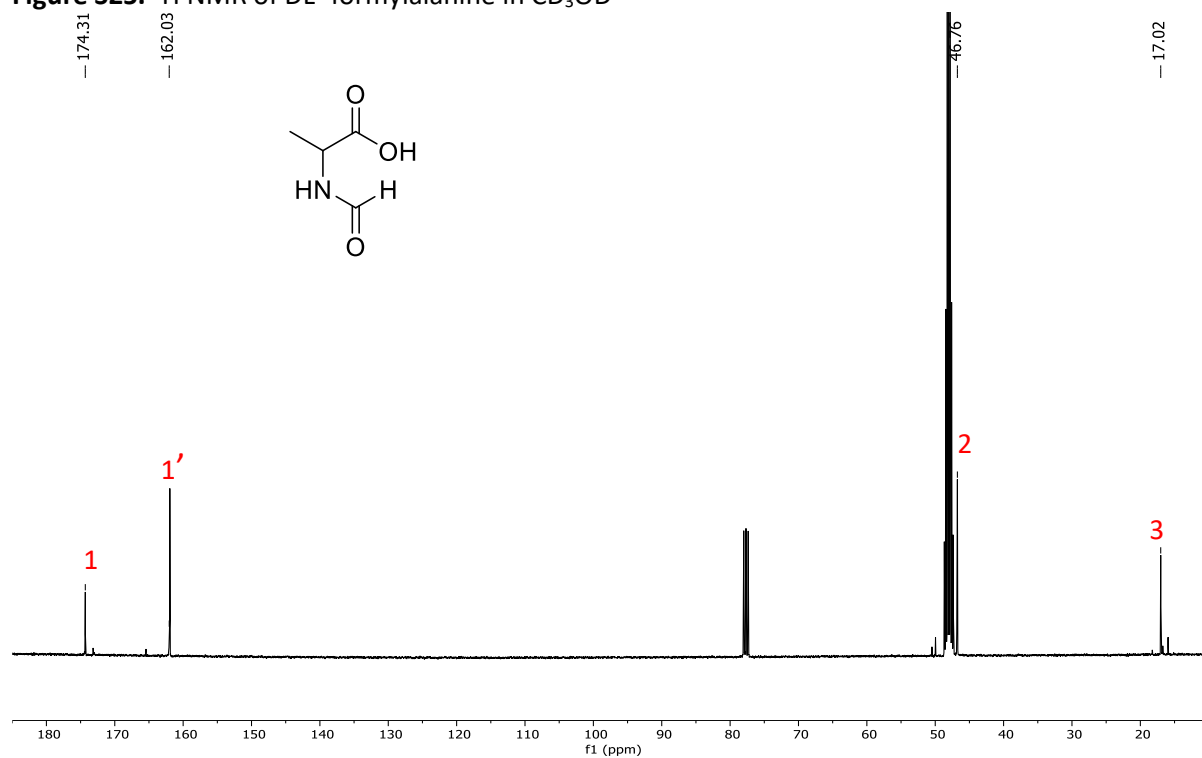

Figure S26.  $^{13}\text{C}$  NMR of DL- formylalanine in  $\text{CD}_3\text{OD}+\text{CDCl}_3$

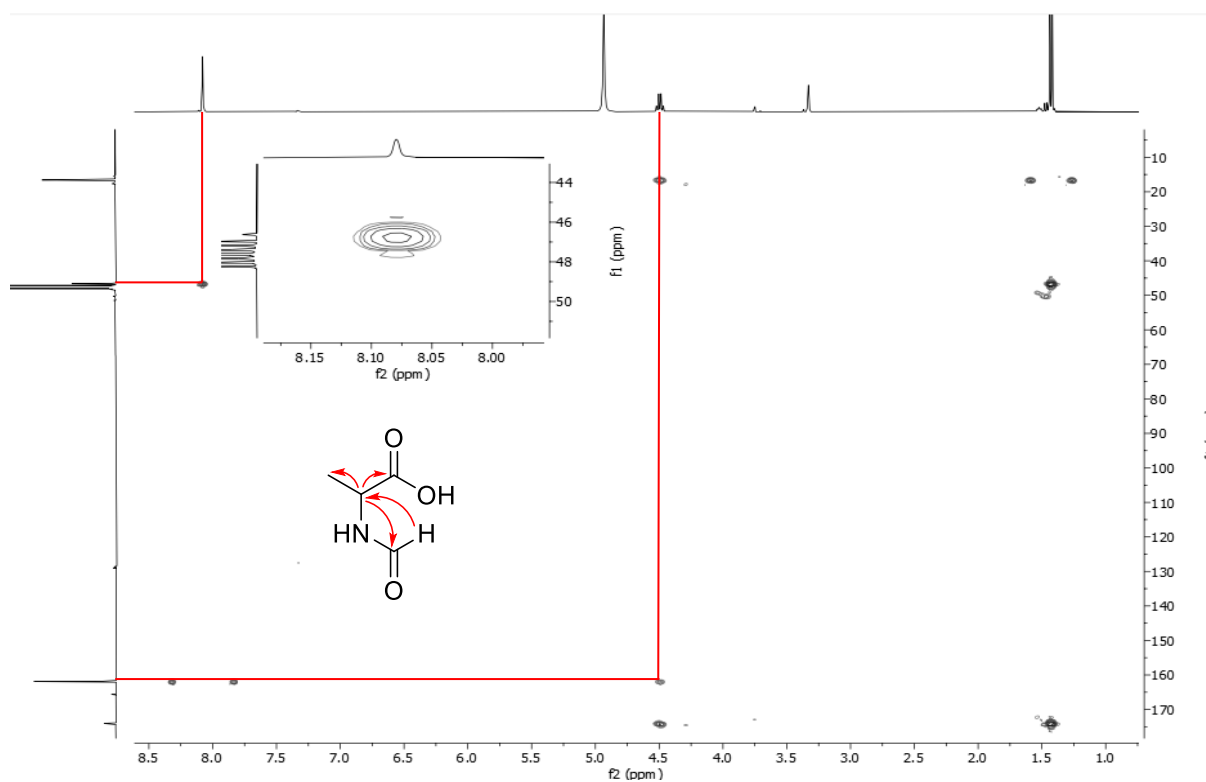

**Figure S27.** HMBC of DL- formylalanine in  $\text{CD}_3\text{OD}$

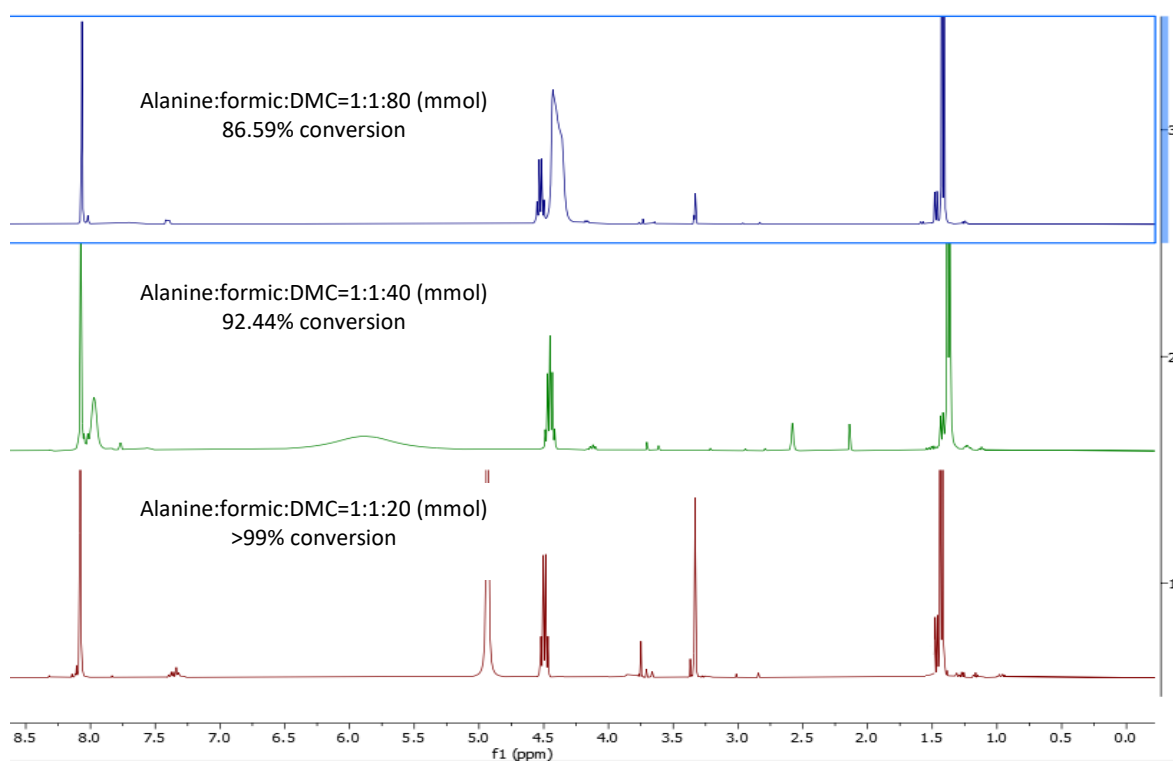

**Figure S28.** Compare the effect DMC assisted by formic acid in the reaction of alanine

DL-formylleucine.  $^1\text{H-NMR}$  ( $\text{CD}_3\text{OD}+\text{CDCl}_3$ ):  $\delta$  8.12 (s, 1H), 4.56-4.53 (m, 1H), 1.76-1.73 (m, 2H), 1.71-1.59 (m, 1H), 0.99-0.95 (m, 6H);  $^{13}\text{C-NMR}$  ( $\text{CD}_3\text{OD}+\text{CDCl}_3$ ):  $\delta$  174.33, 162.36, 49.53, 40.58, 24.67, 21.99, 20.73.

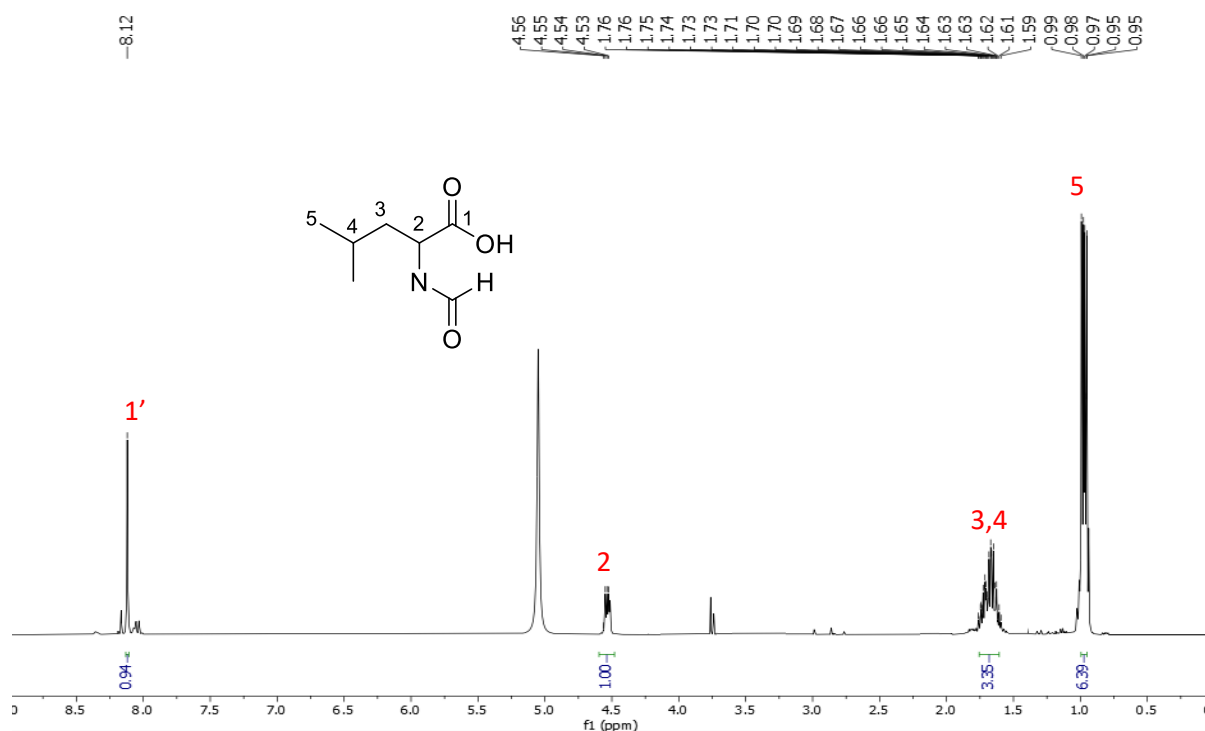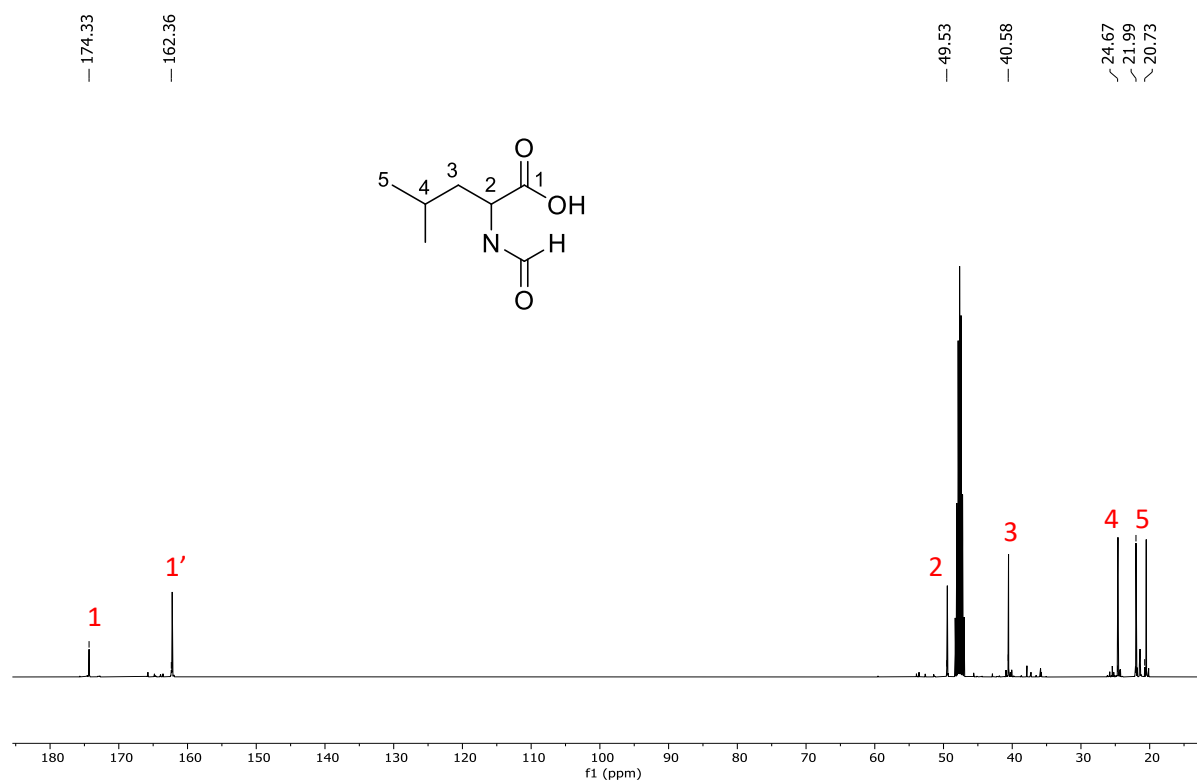

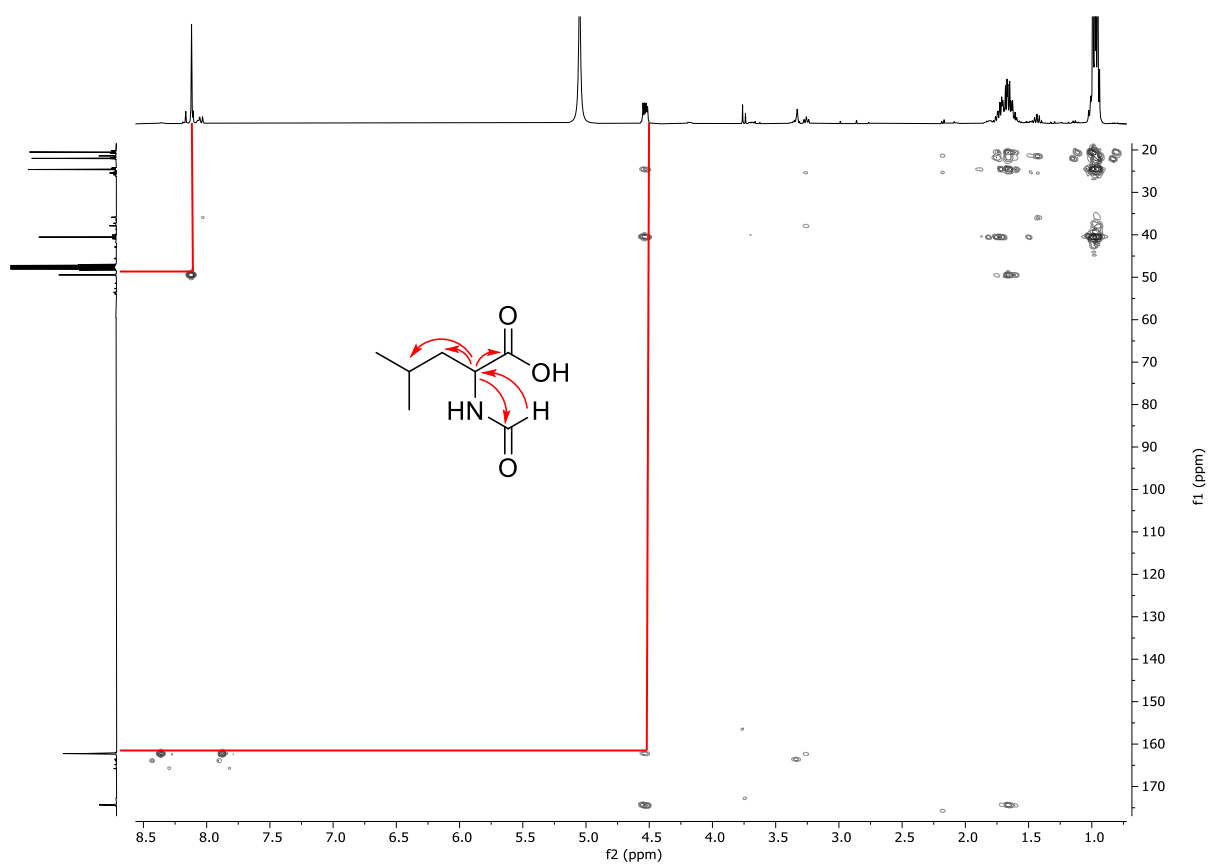

**Figure S31.** HMBC of DL-formylleucine in  $\text{CD}_3\text{OD}$

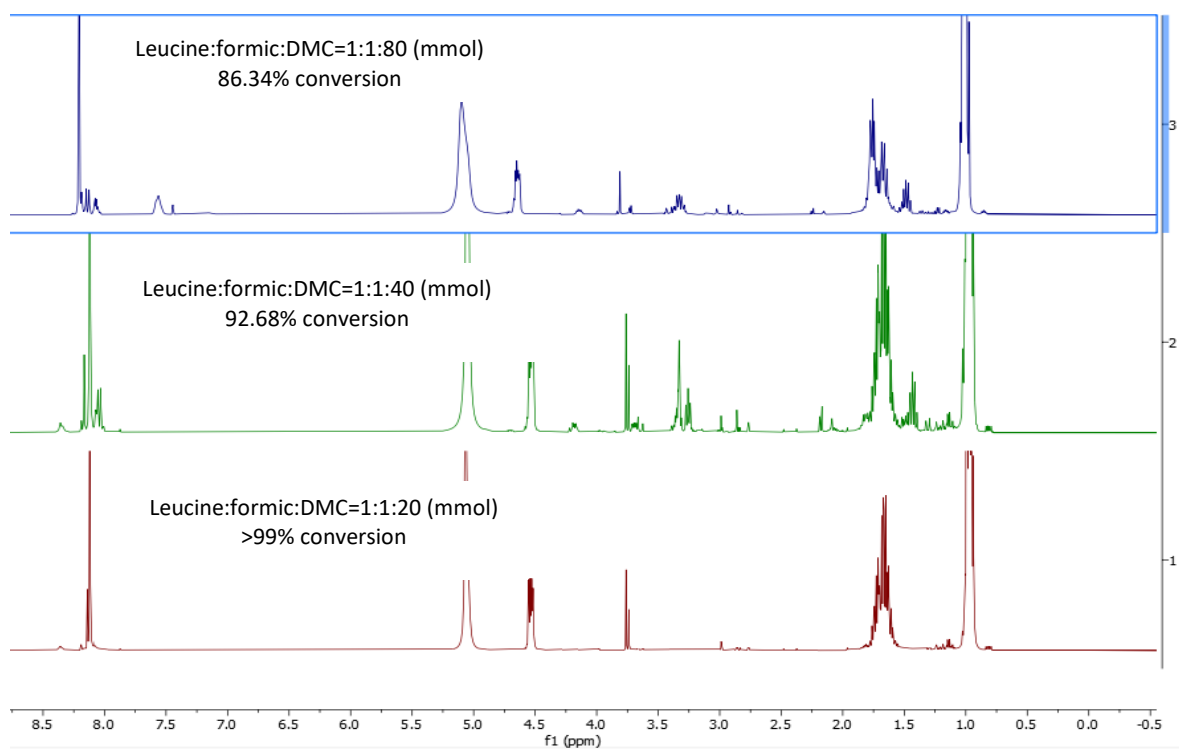

**Figure S32.** Compare the effect DMC assisted by formic acid in the reaction of leucine

DL-formylphenylalanine.  $^1\text{H-NMR}$  ( $\text{CD}_3\text{OD}+\text{CDCl}_3$ ):  $\delta$  8.78 (s, 1H), 7.80 (m, 5H), 5.41 (m, 2H), 3.73-3.92 (2 set of dd, 2H);  $^{13}\text{C-NMR}$  ( $\text{CD}_3\text{OD}+\text{CDCl}_3$ ):  $\delta$  173.66, 162.31, 137.98, 130.05, 129.08, 127.35, 53.03, 38.22.

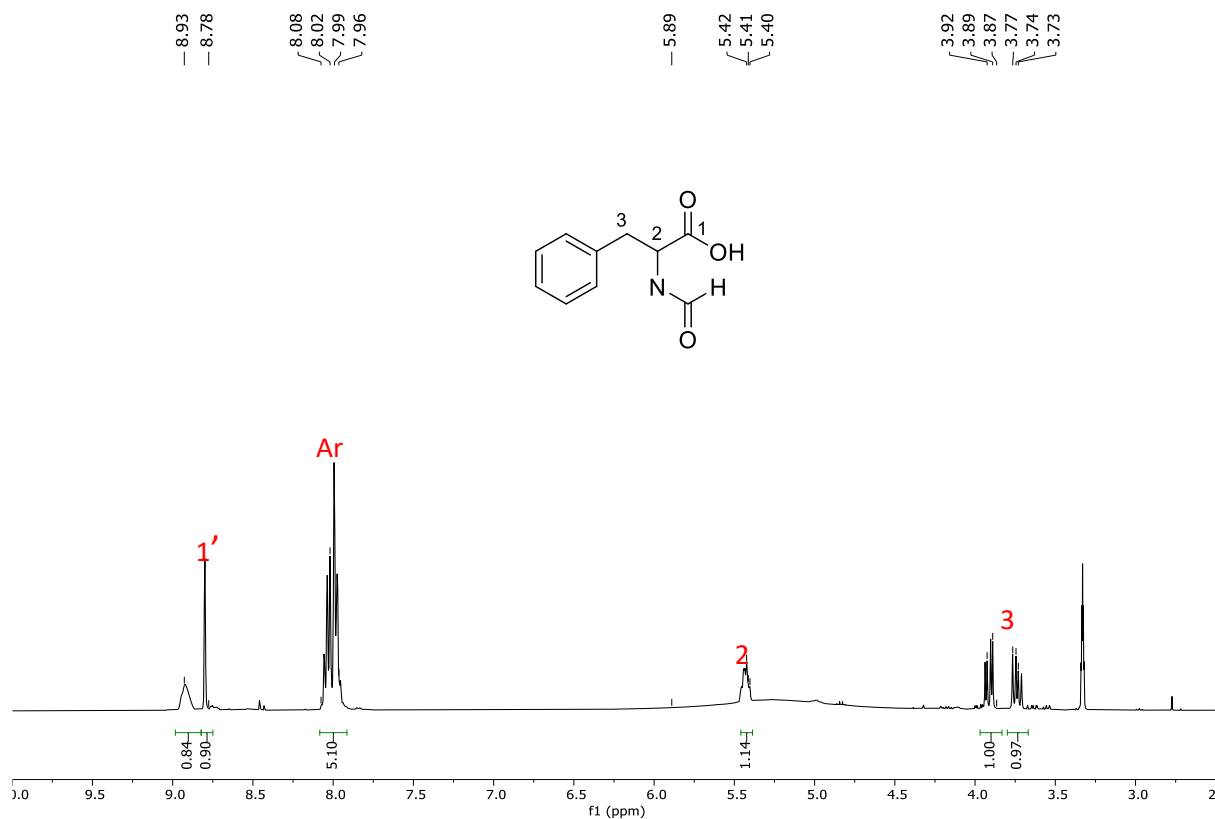

**Figure S33.**  $^1\text{H}$  NMR of DL-formylphenylalanine in  $\text{CDCl}_3+\text{CD}_3\text{OD}$

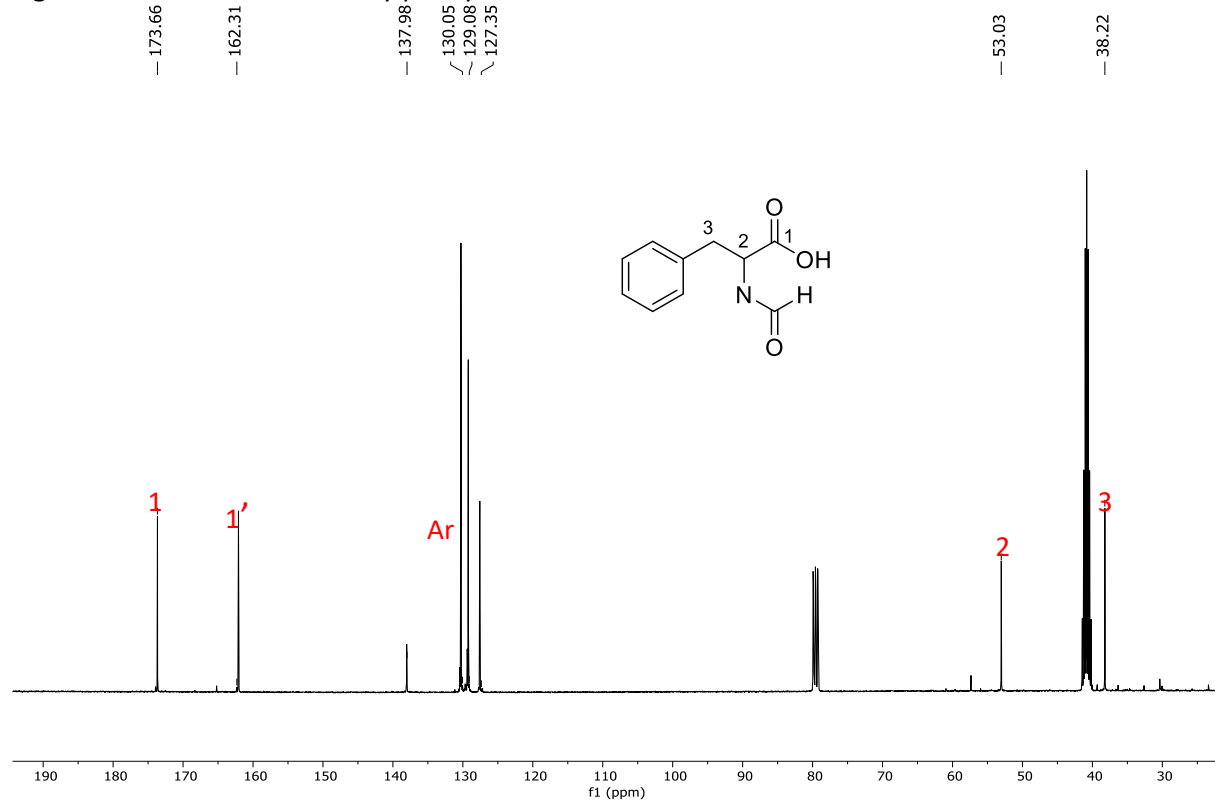

**Figure S34.**  $^{13}\text{C}$  NMR of DL-formylphenylalanine in  $\text{CDCl}_3+\text{CD}_3\text{OD}$

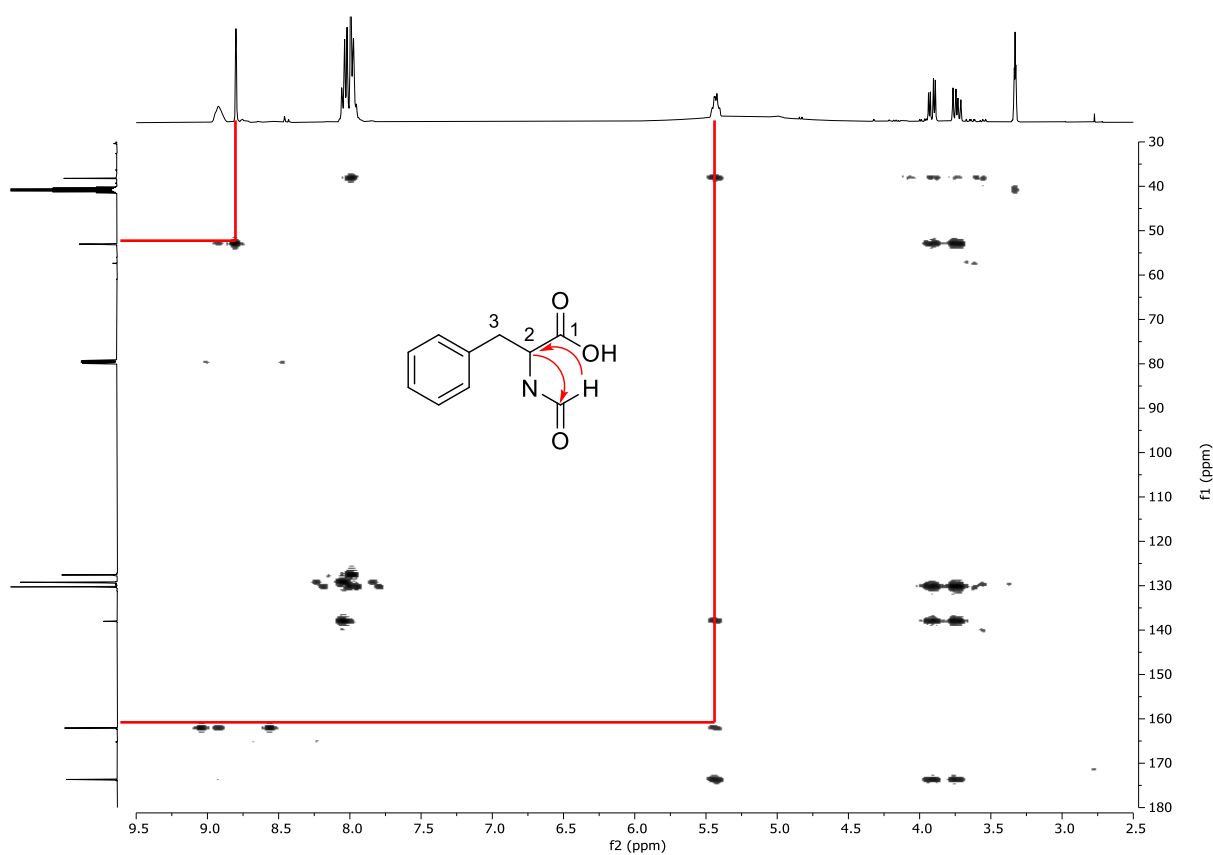

**Figure S35.** HMBC of DL-formylphenylalanine in  $\text{CD}_3\text{OD}$

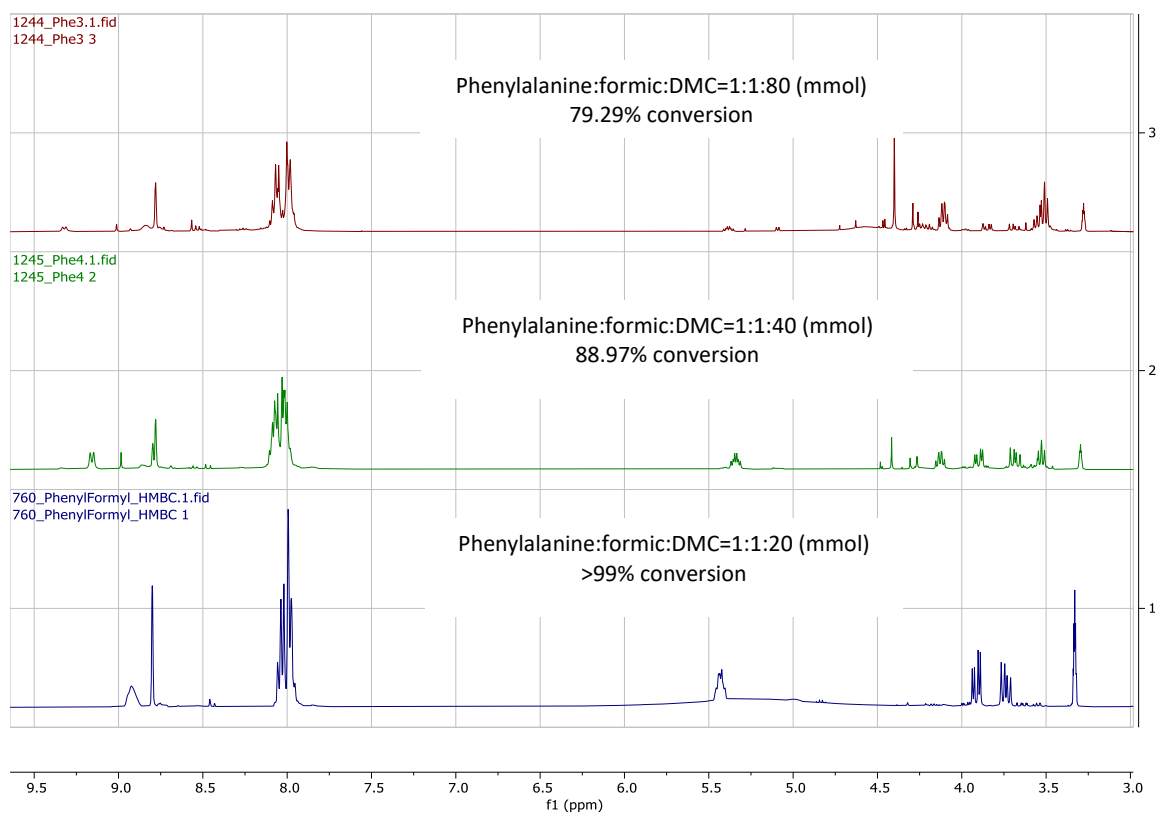

**Figure S36.** Compare the effect DMC assisted by formic acid in the reaction of phenylalanine

DL-formylmethionine.  $^1\text{H}$ -NMR ( $\text{CD}_3\text{OD}+\text{CDCl}_3$ ):  $\delta$  8.14 (s, 1H), 4.67-4.64 (q, 1H), 2.68-2.50 (m, 2H), 2.16-1.97 (m, 2H), 2.14 (s, 3H);  $^{13}\text{C}$ -NMR ( $\text{CD}_3\text{OD}+\text{CDCl}_3$ ):  $\delta$  173.32, 162.05, 50.23, 31.37, 29.83, 14.88.

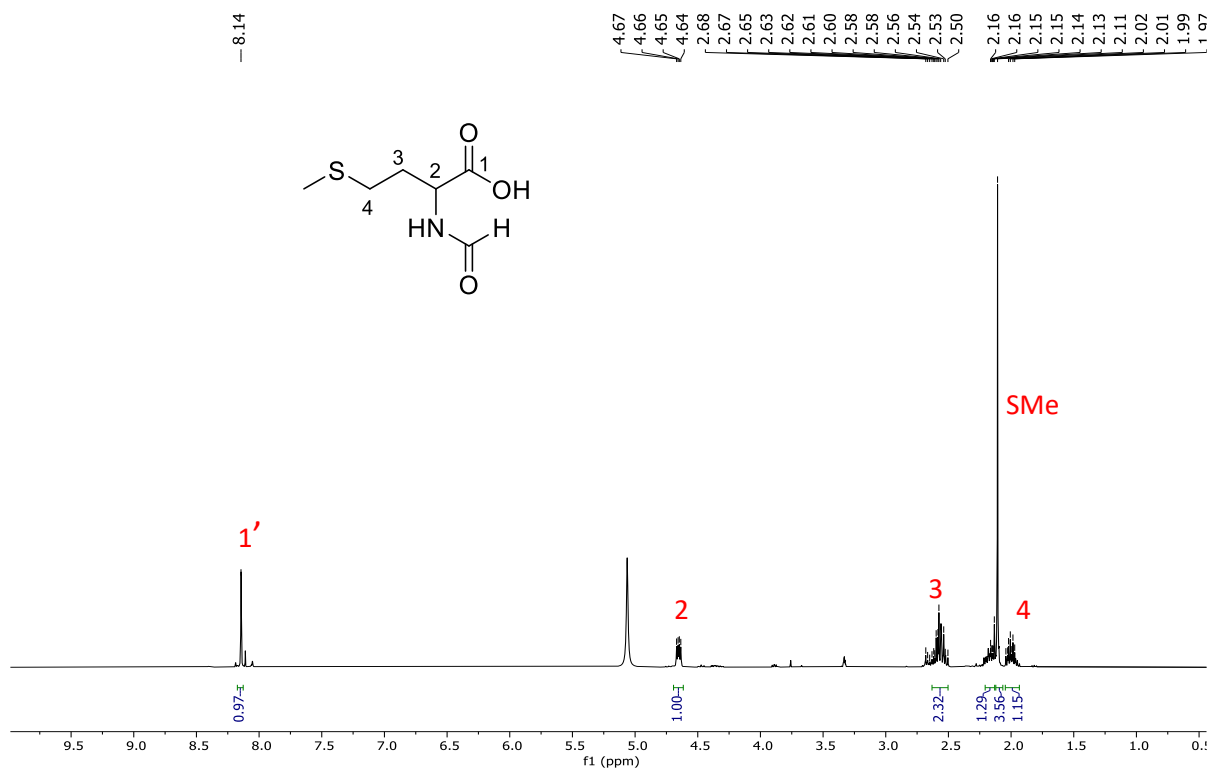

**Figure S37.**  $^1\text{H}$  NMR of DL-formylmethionine in  $\text{CDCl}_3+\text{CD}_3\text{OD}$

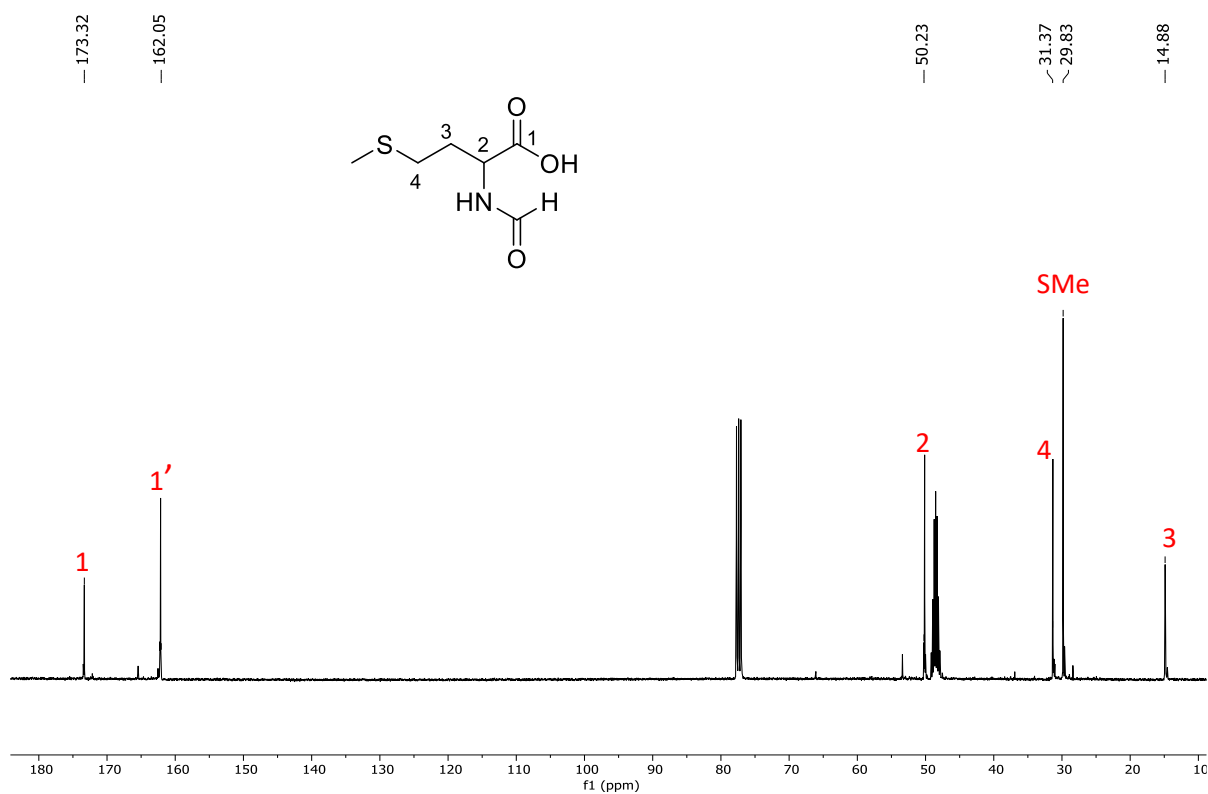

**Figure S38.**  $^{13}\text{C}$  NMR of DL-formylmethionine in  $\text{CDCl}_3+\text{CD}_3\text{OD}$

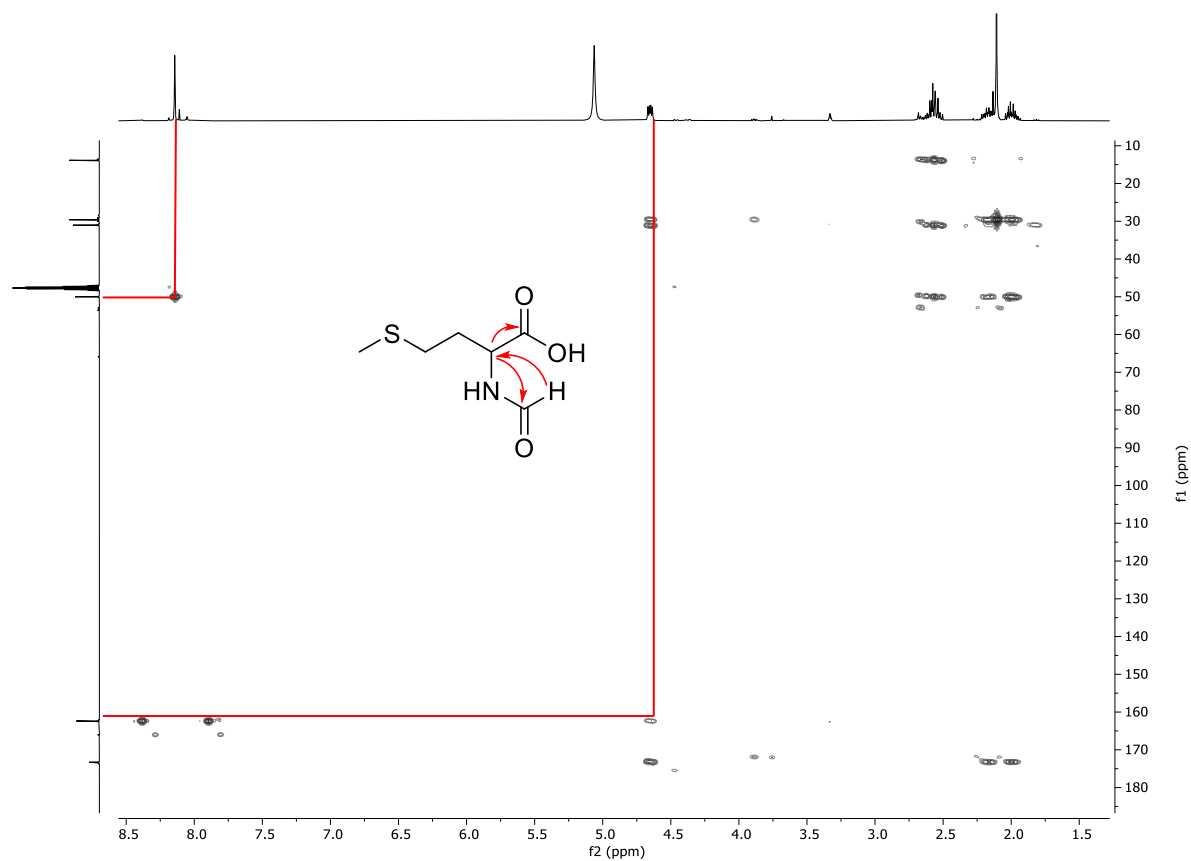

**Figure S39.** HMBC of DL- formylmethionine in  $\text{CD}_3\text{OD}$

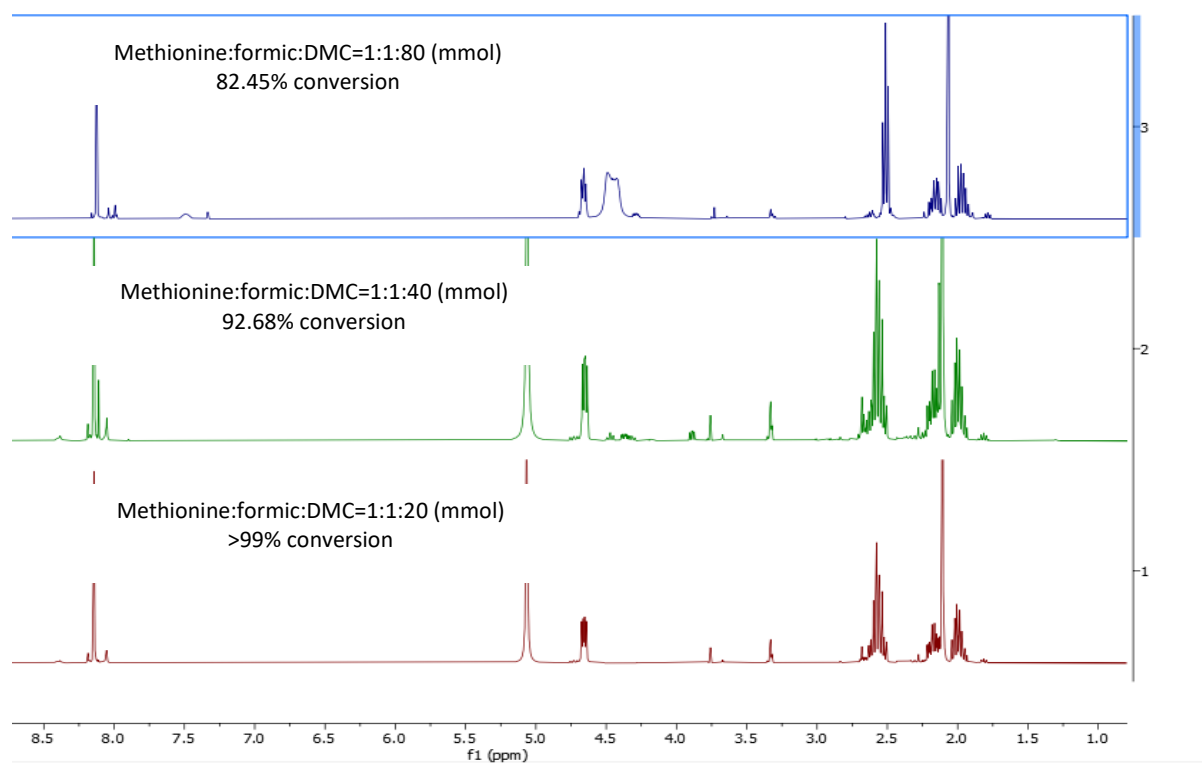

**Figure S40.** Compare the effect DMC assisted by formic acid in the reaction of methionine

DL-alanine.  $^1\text{H}$ -NMR ( $\text{D}_2\text{O}$ ):  $\delta$  3.79-3.74 (q, 1H), 1.47-1.45 (d, 3H);  $^{13}\text{C}$ -NMR ( $\text{D}_2\text{O}$ ):  $\delta$  178.61, 53.08, 18.87.

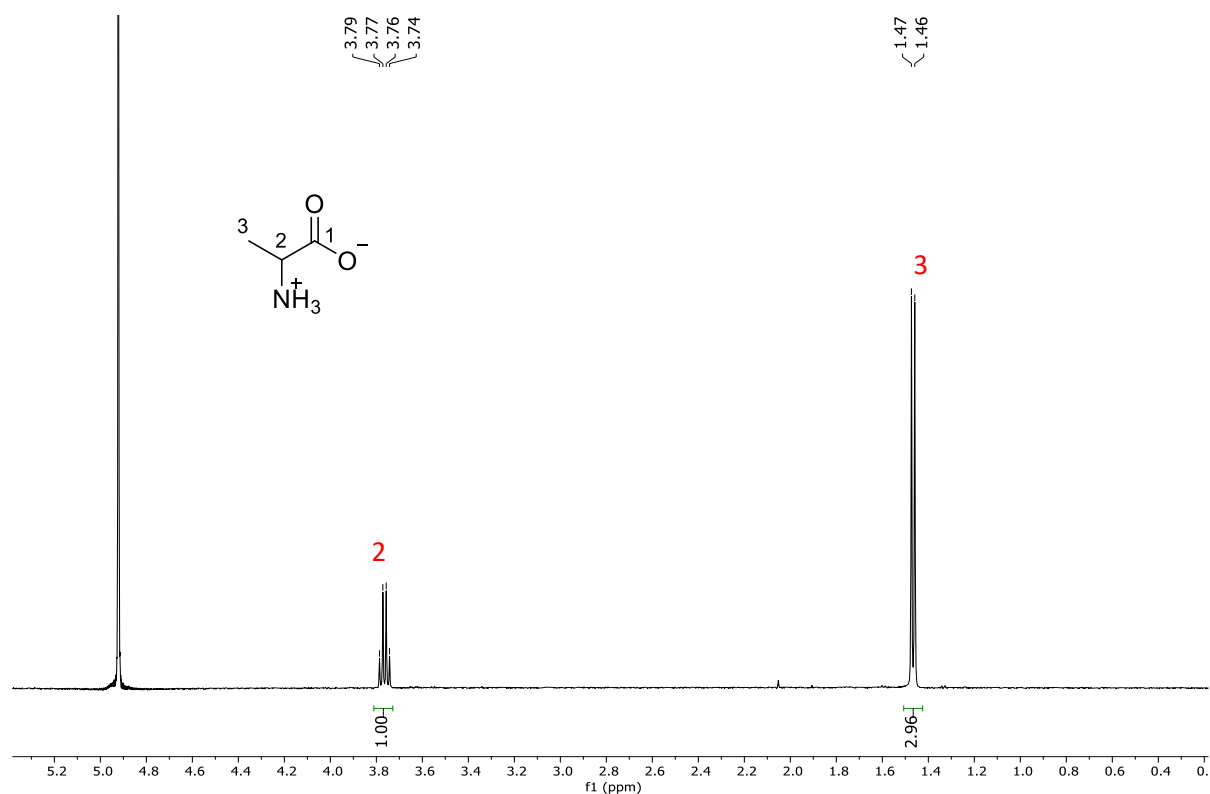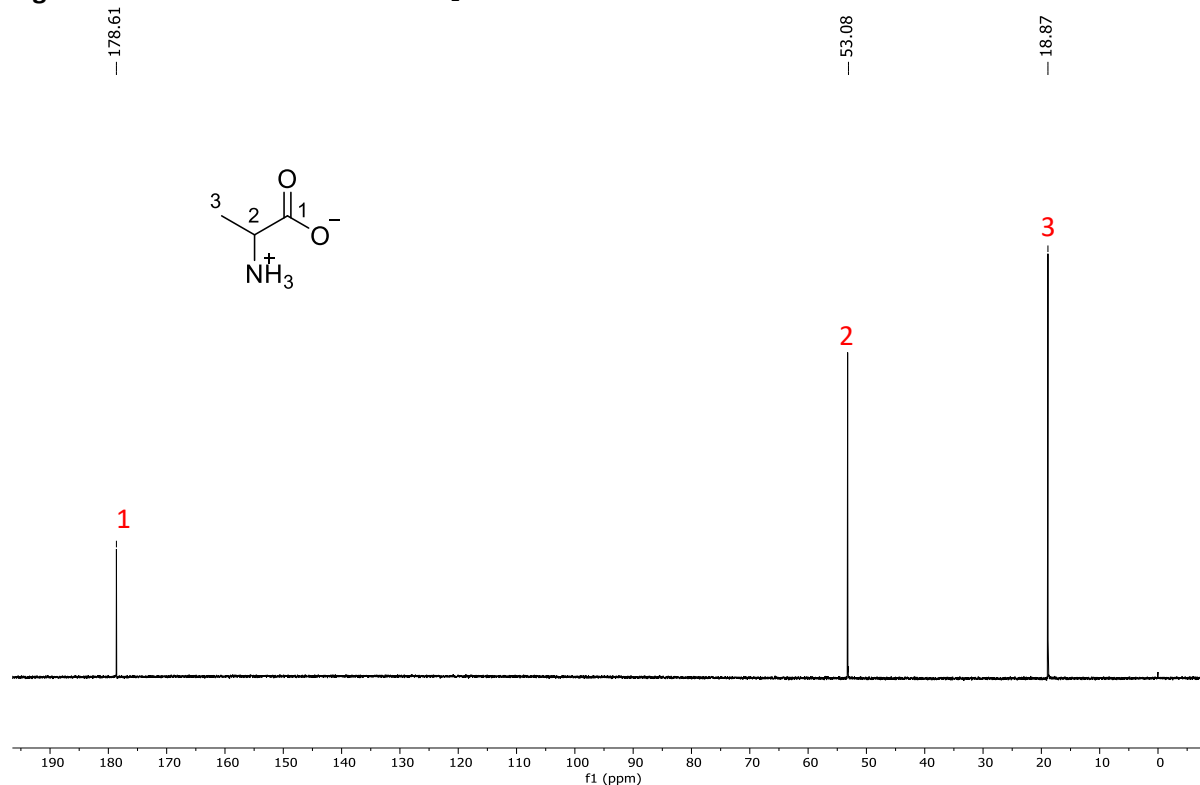

DL-phenylalanine.  $^1\text{H}$ -NMR ( $\text{D}_2\text{O}$ ):  $\delta$  7.43-7.31 (m, 5H), 3.99-3.97 (q, 1H), 3.29-3.10 (m, 2H);  $^{13}\text{C}$ -NMR ( $\text{D}_2\text{O}$ ):  $\delta$  176.78, 138.02, 132.09, 131.84, 130.42, 58.75, 39.10.

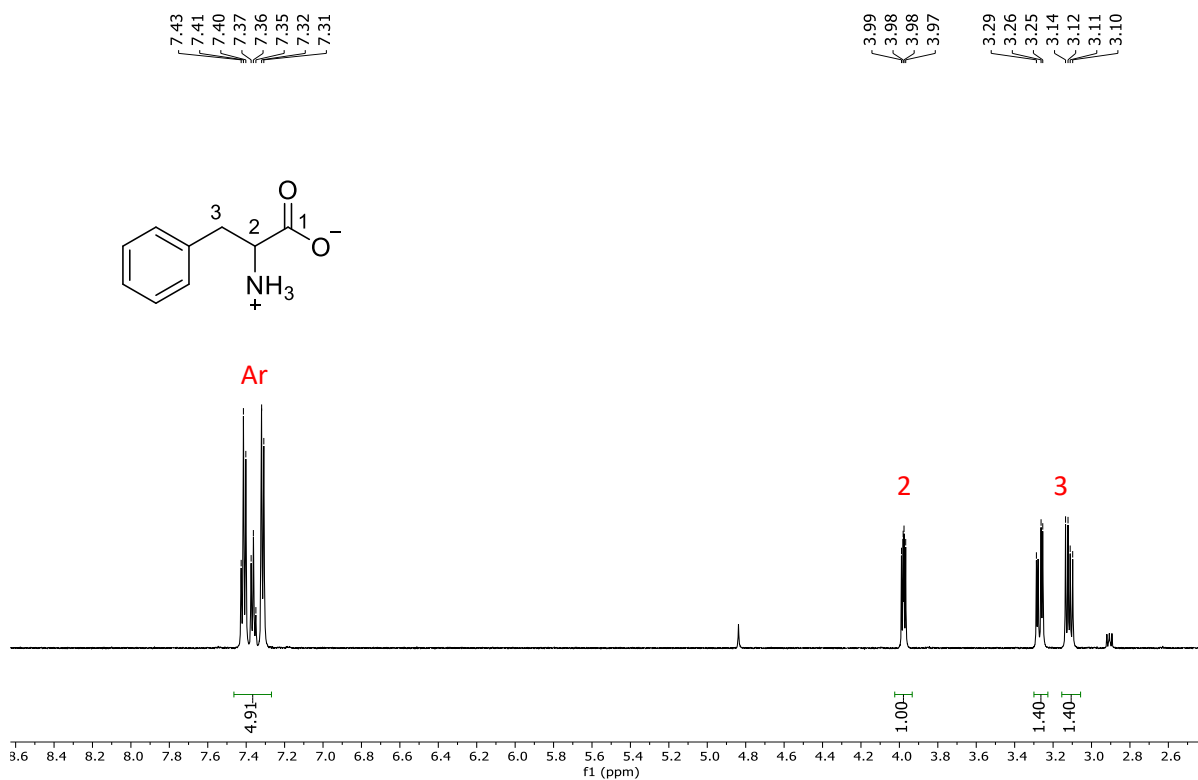

**Figure S43.**  $^1\text{H}$  NMR of phenylalanine in  $\text{D}_2\text{O}$

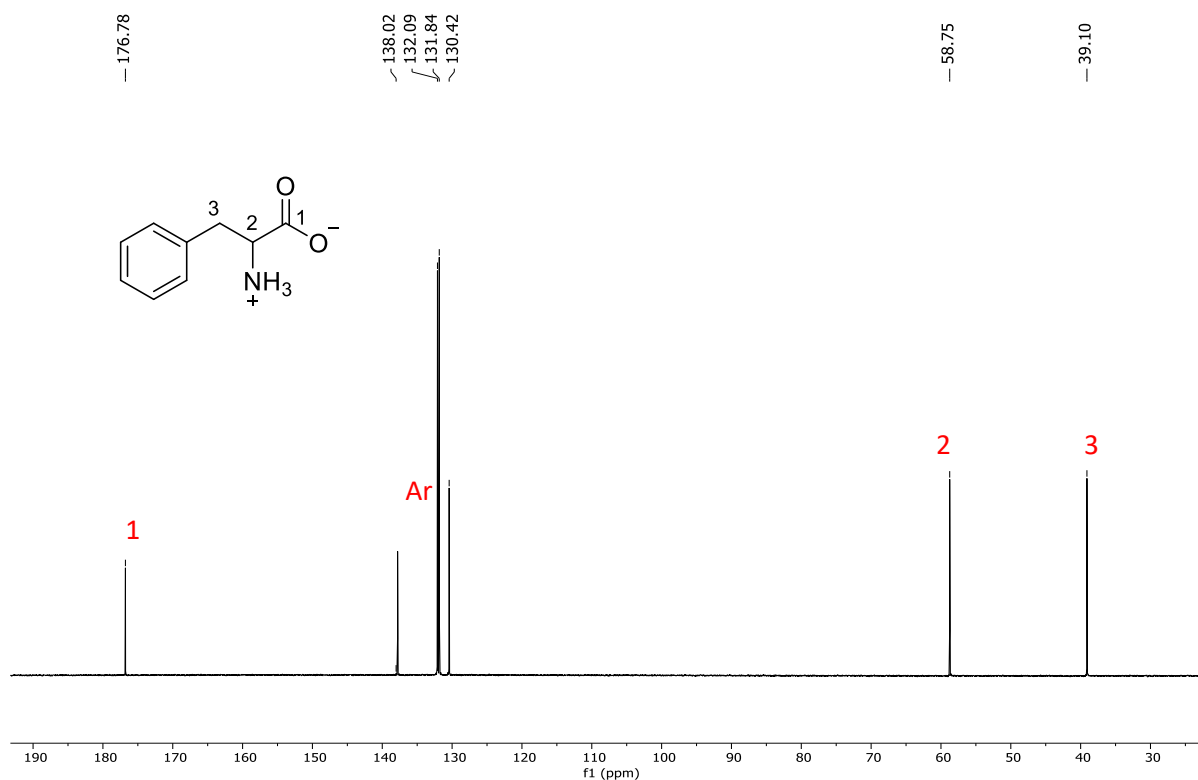

**Figure S44.**  $^{13}\text{C}$  NMR of DL-phenylalanine in  $\text{D}_2\text{O}$

DL-leucine.  $^1\text{H-NMR}$  ( $\text{D}_2\text{O}$ ):  $\delta$  3.72-3.70 (t, 1H), 1.74-1.65.(m, 3H), 0.96-0.94 (d, 6H);  $^{13}\text{C-NMR}$  ( $\text{D}_2\text{O}$ ):  $\delta$  178.38, 56.12, 42.53, 27.01, 24.76, 23.59.

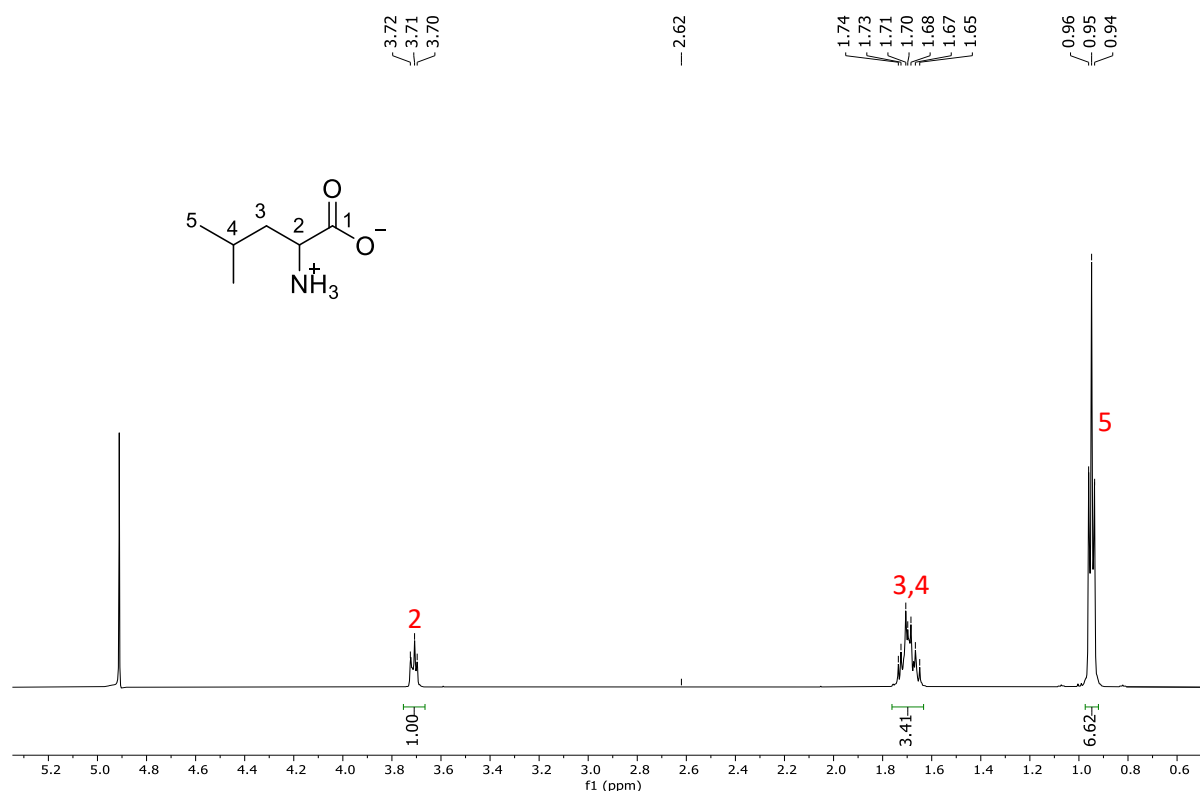

**Figure S45.**  $^1\text{H-NMR}$  of DL-leucine in  $\text{D}_2\text{O}$

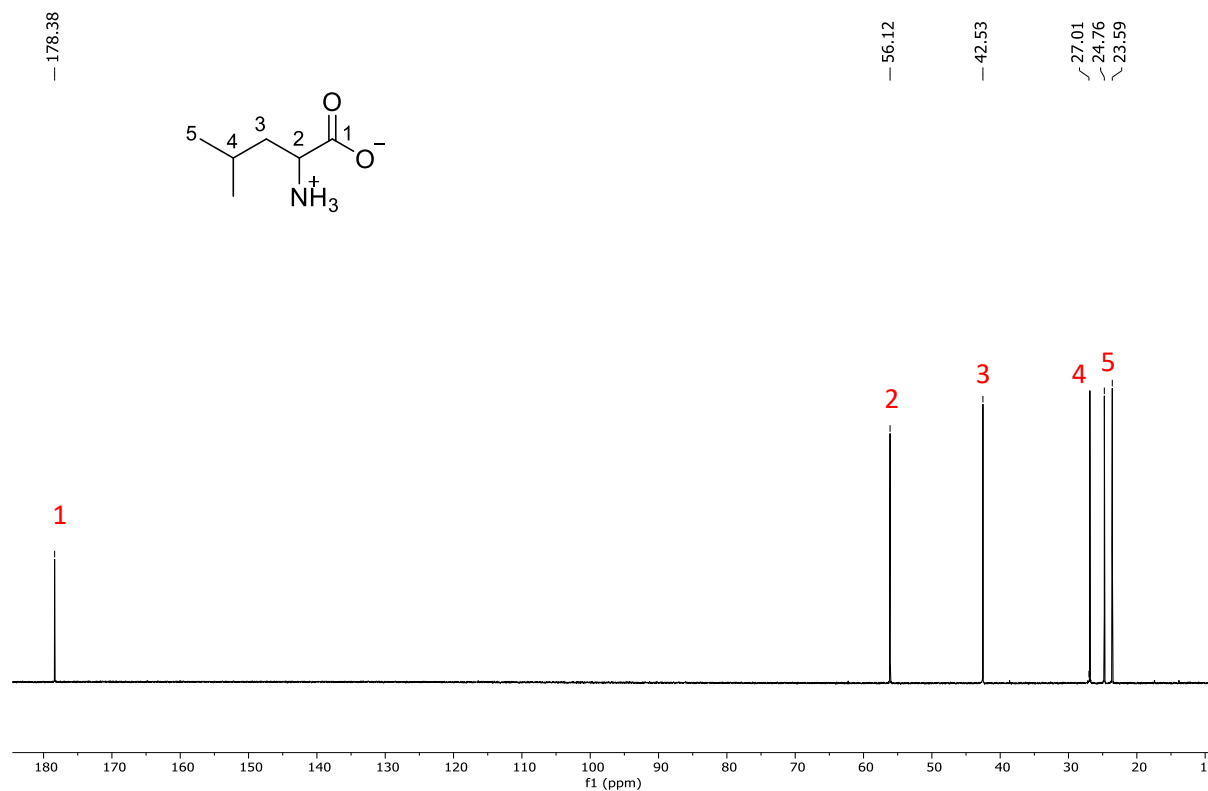

**Figure S46.**  $^{13}\text{C-NMR}$  of DL-leucine in  $\text{D}_2\text{O}$

DL-methionine.  $^1\text{H}$ -NMR ( $\text{D}_2\text{O}$ ):  $\delta$  3.72-3.70 (t, 1H), 2.55-2.52 (t, 2H), 2.02-1.97 (m, 2H), 2.03 (s, 3H);  
 $^{13}\text{C}$ -NMR ( $\text{D}_2\text{O}$ ):  $\delta$  171.10, 56.59, 32.40, 31.52, 16.64.

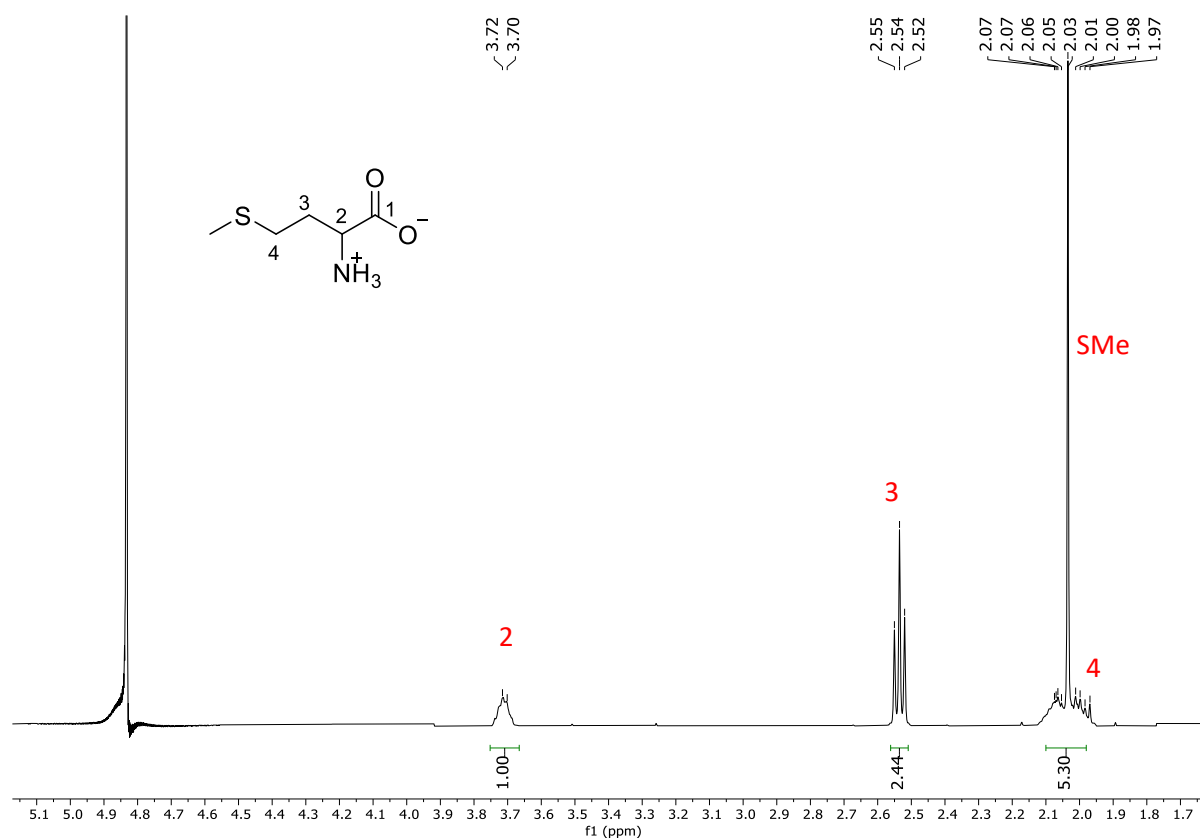

Figure S47.  $^1\text{H}$  NMR of DL-methionine in  $\text{D}_2\text{O}$

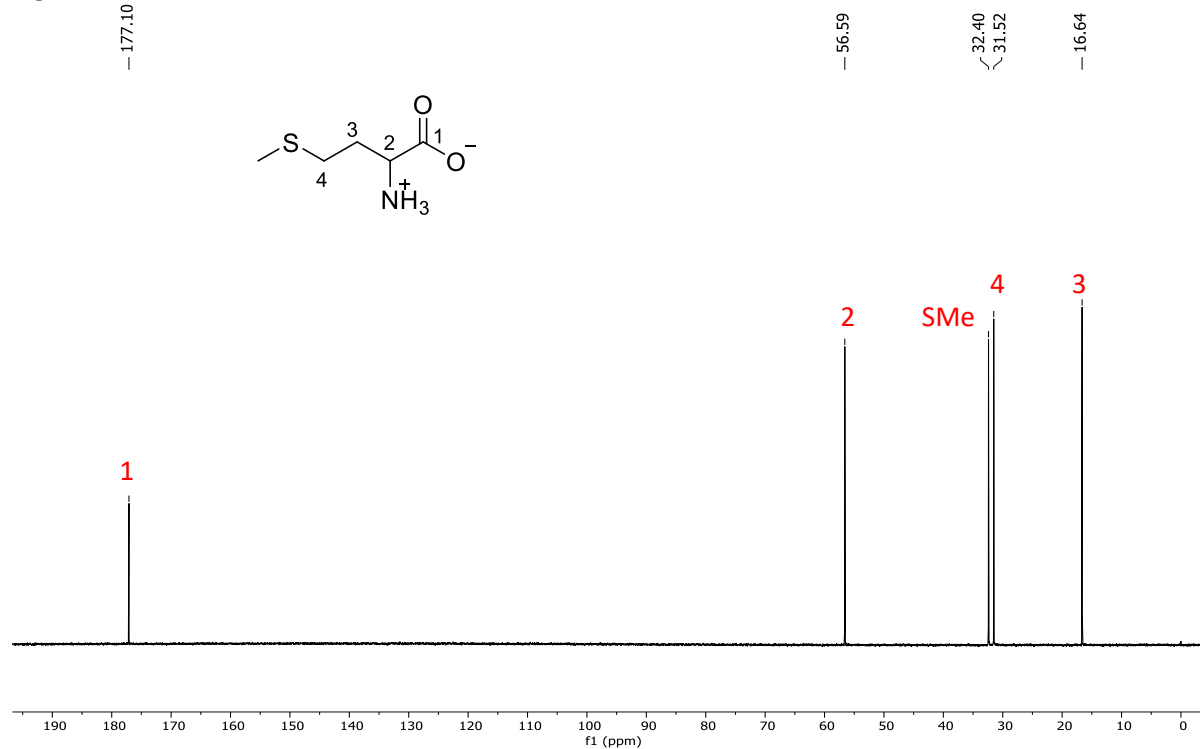

Figure S48.  $^{13}\text{C}$  NMR of DL-methionine in  $\text{D}_2\text{O}$

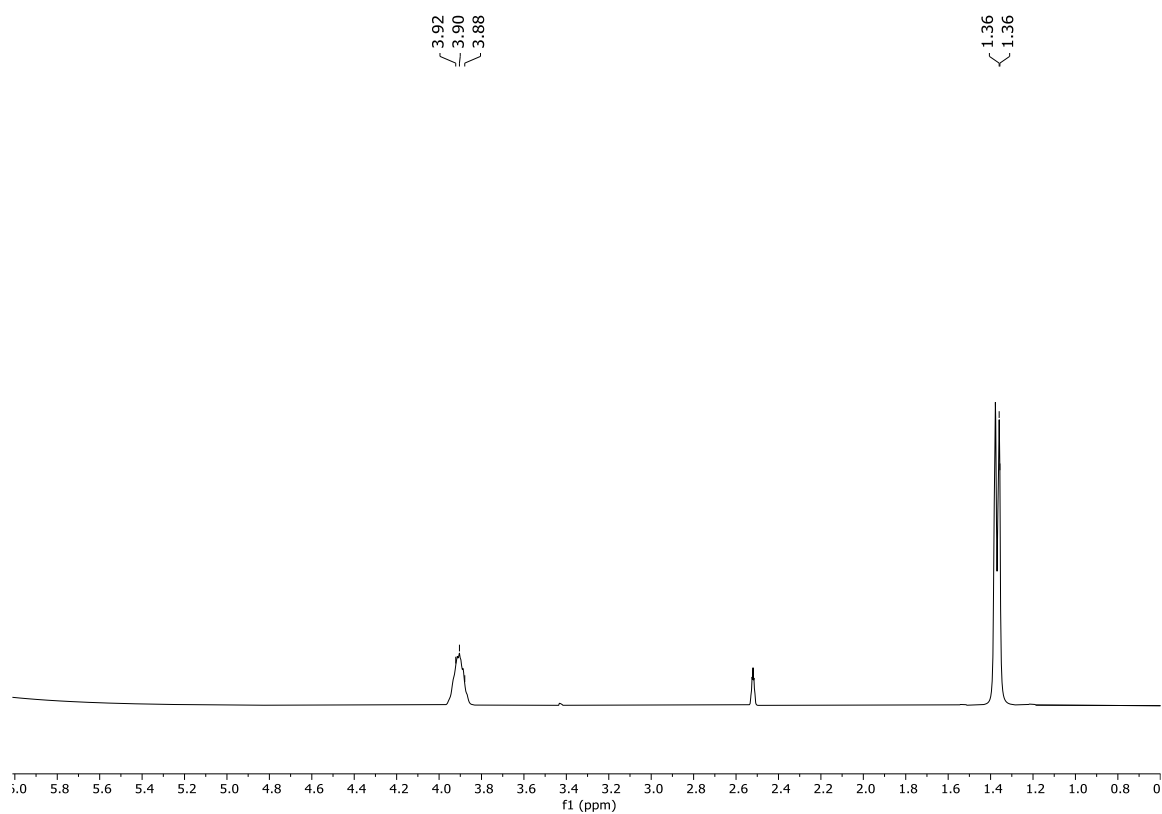

**Figure S49.**  $^1\text{H}$  NMR of reaction of DL-alanine using  $\text{HClO}_4$  under reflux (90 °C) in DMSO

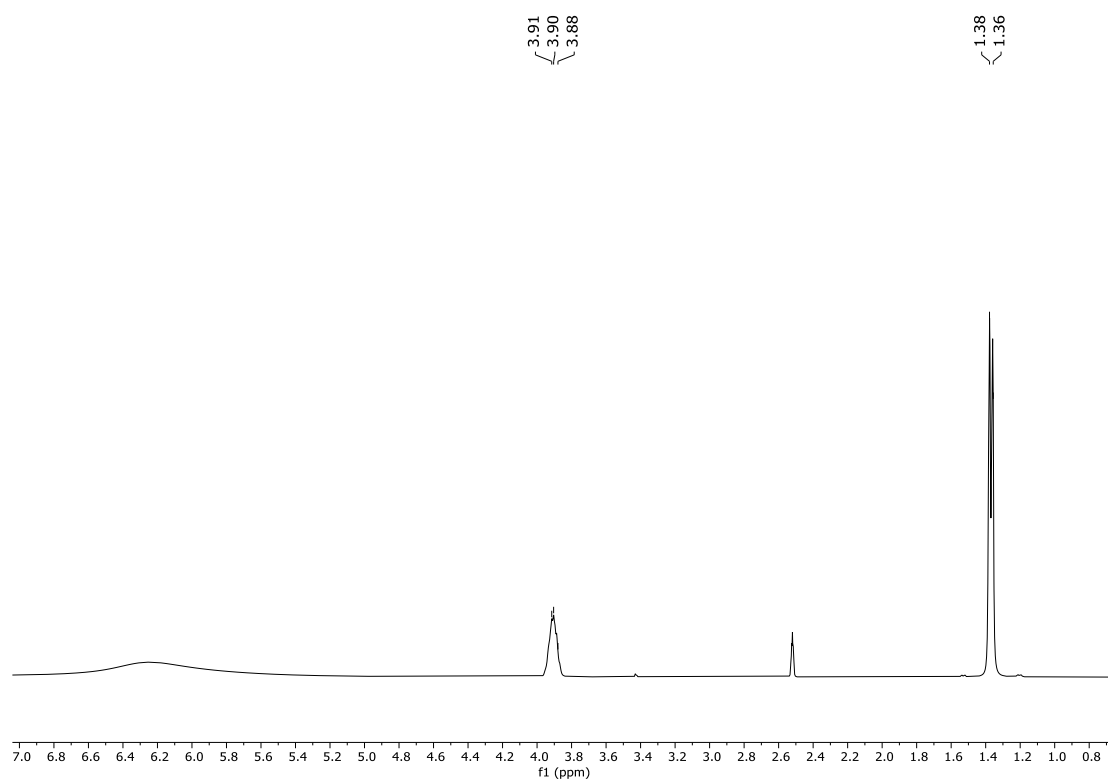

**Figure S50.**  $^1\text{H}$  NMR of reaction of DL-alanine using  $\text{H}_2\text{SO}_4$  under reflux (90 °C) in DMSO

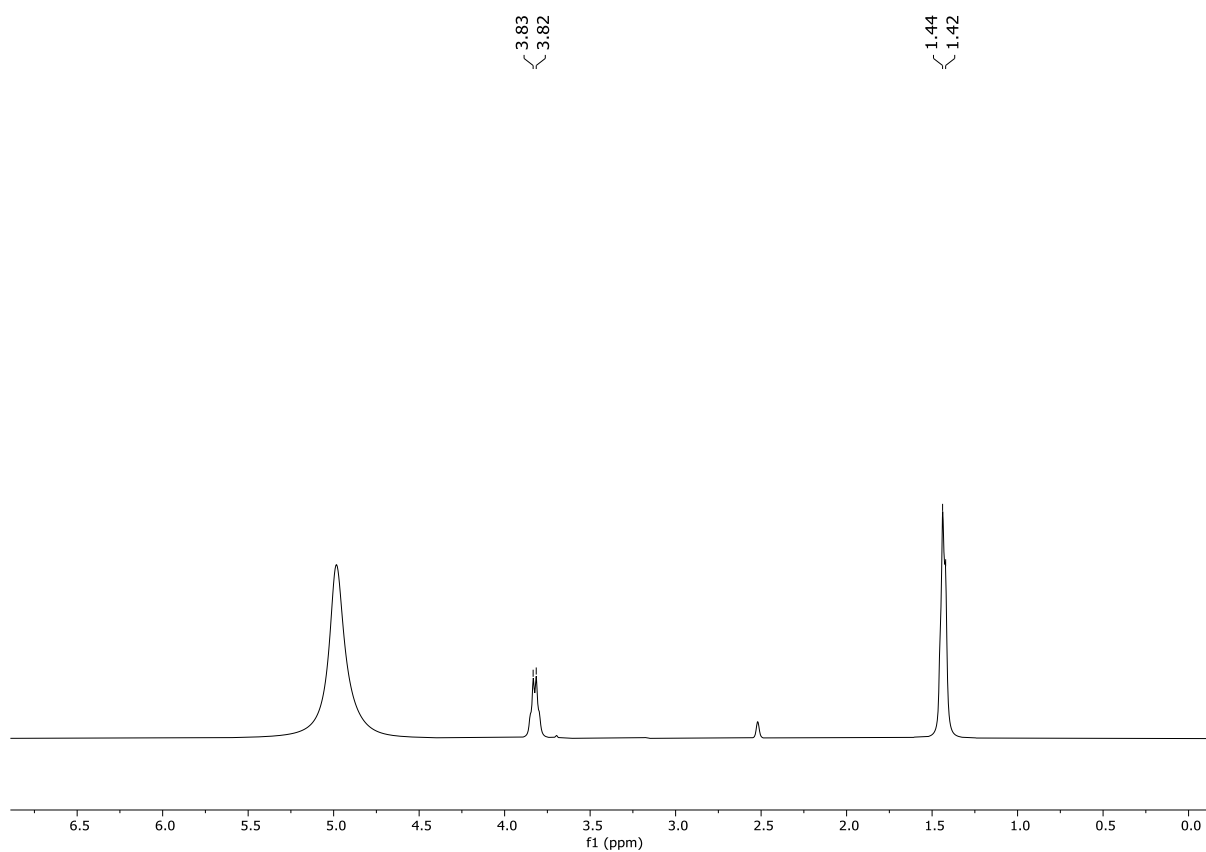

**Figure S51.**  $^1\text{H}$  NMR of reaction of DL-alanine using HCl under reflux (90 °C) in DMSO

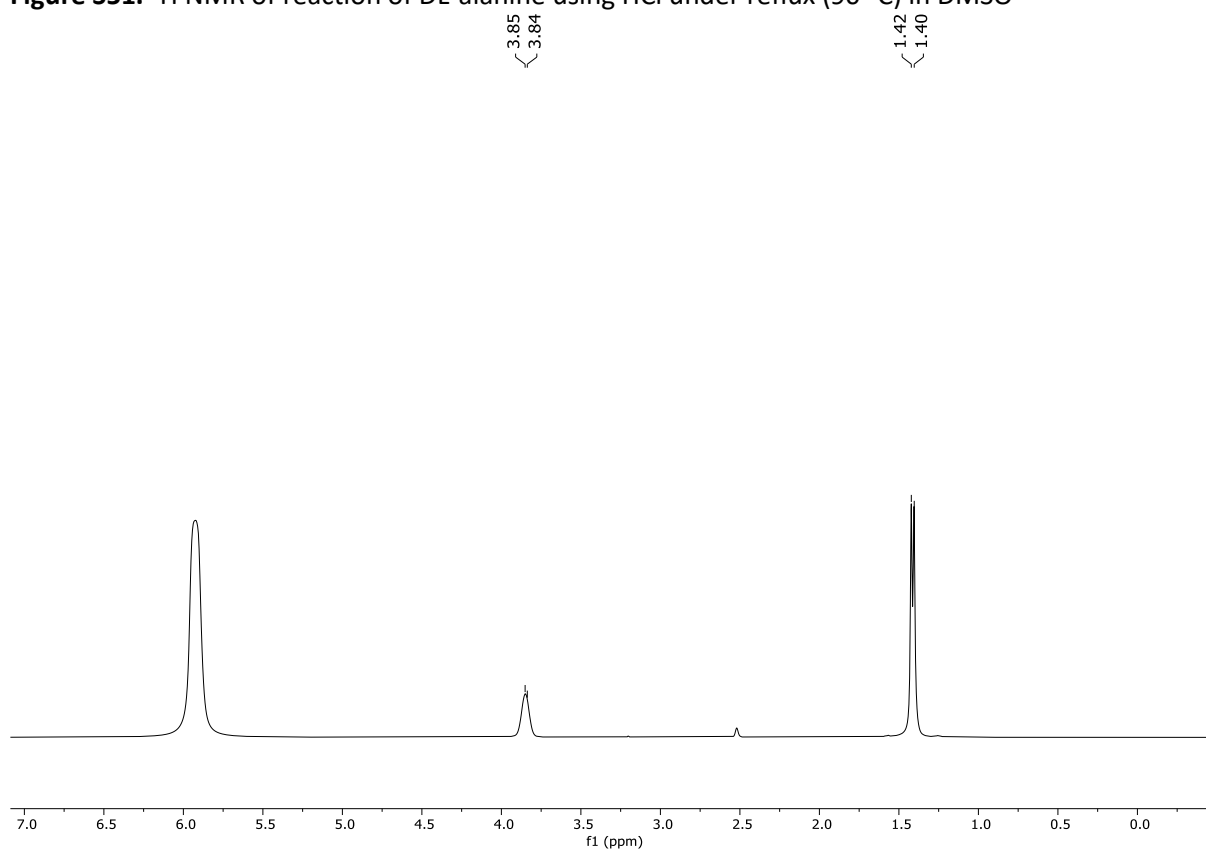

**Figure S52.**  $^1\text{H}$  NMR of reaction of DL-alanine using  $\text{HNO}_3$  under reflux (90 °C) in DMSO

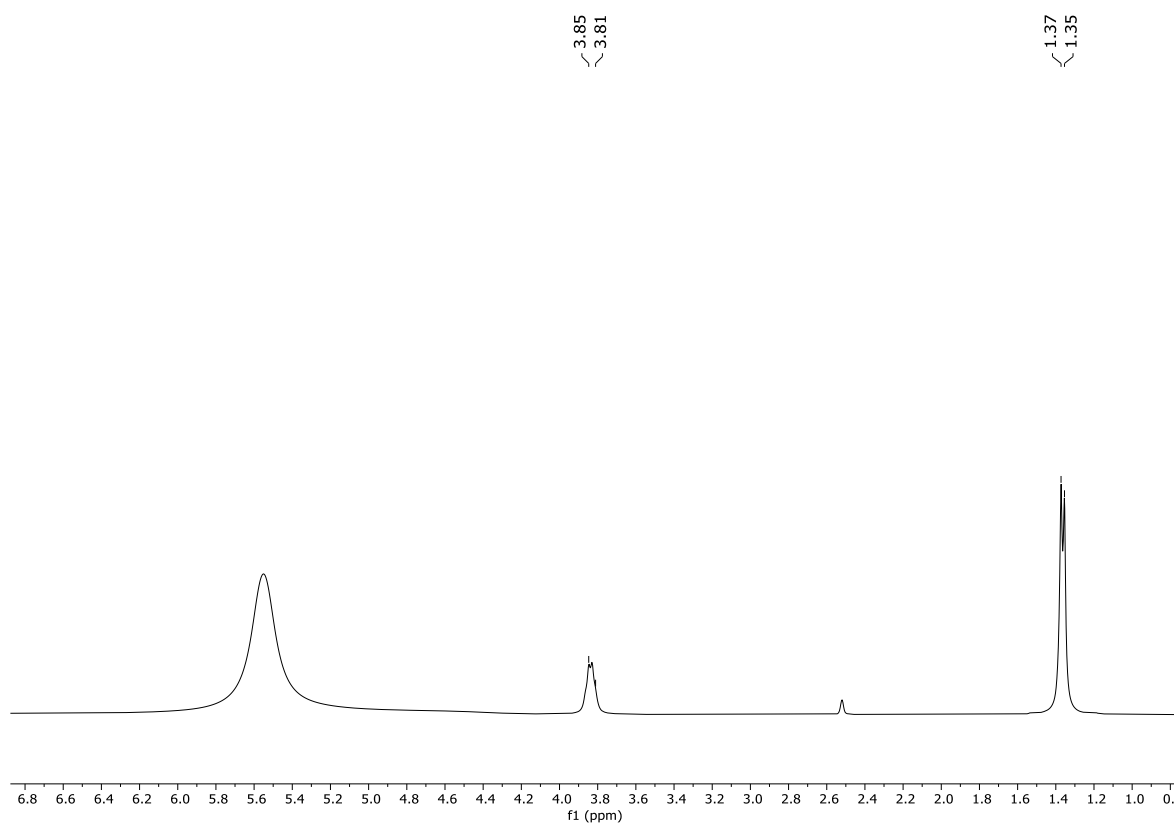

**Figure S53.**  $^1\text{H}$  NMR of reaction of DL-alanine using  $\text{HCO}_2\text{H}$  under reflux (90 °C) in DMSO

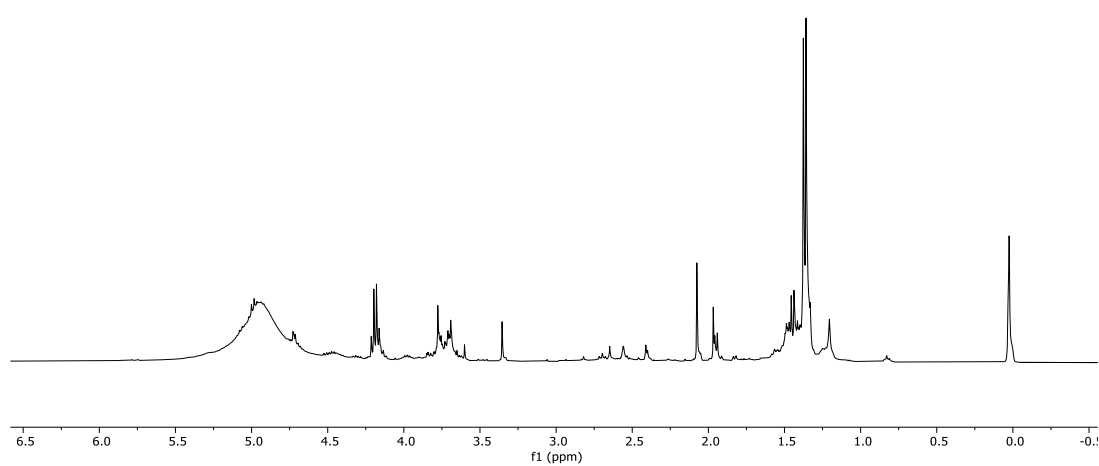

**Figure S54.**  $^1\text{H}$  NMR of reaction of DL-alanine with HCl in  $\text{CDCl}_3 + \text{CD}_3\text{OD}$

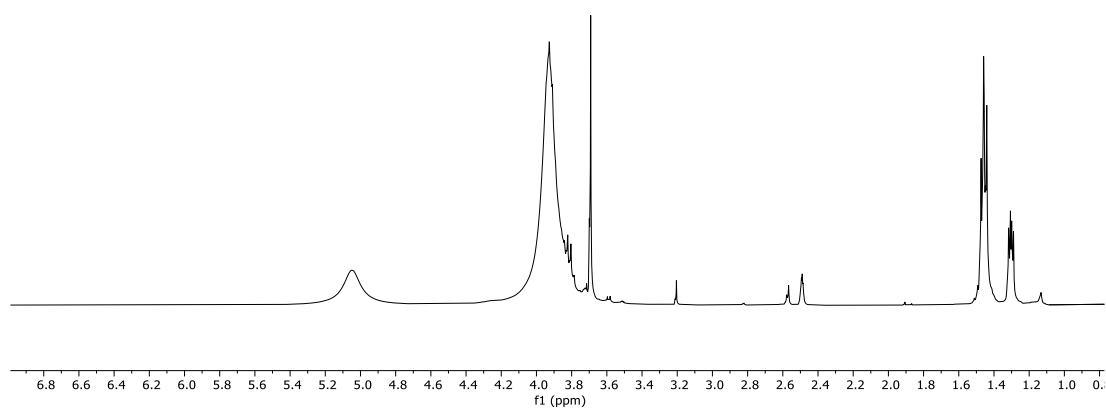

**Figure S55.**  $^1\text{H}$  NMR of reaction of DL-alanine with  $\text{HNO}_3$  in  $\text{CDCl}_3 + \text{CD}_3\text{OD}$

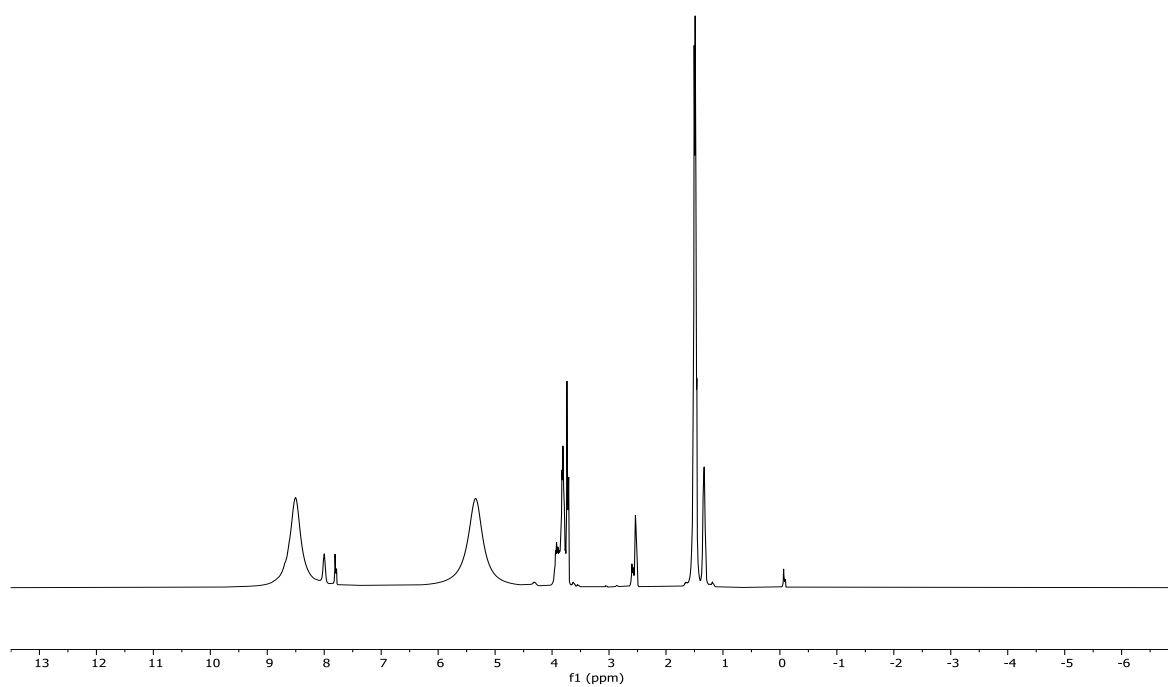

**Figure S56.**  $^1\text{H}$  NMR of reaction of DL-alanine with  $\text{FeCl}_3$  in  $\text{CDCl}_3 + \text{CD}_3\text{OD}$

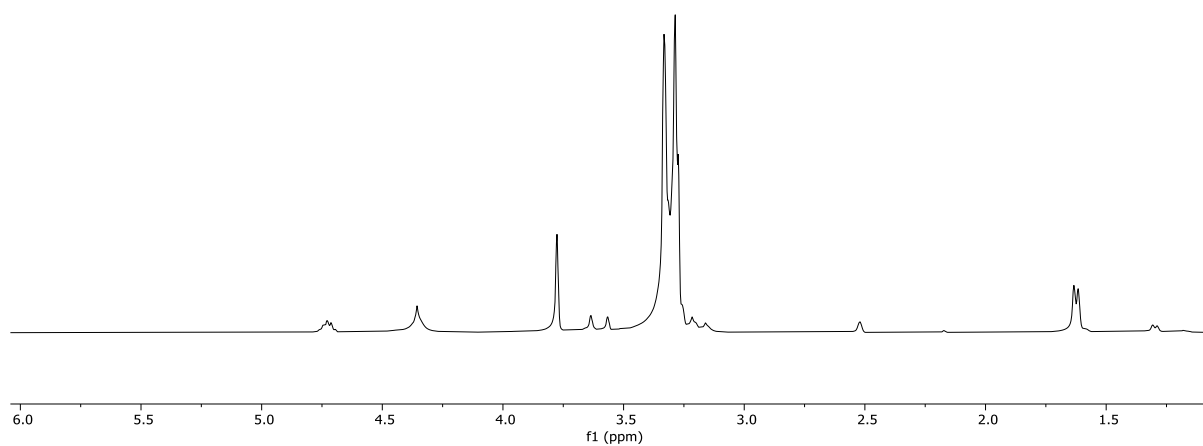

**Figure S57.** <sup>1</sup>H NMR of reaction of DL-alanine with AlCl<sub>3</sub> in CDCl<sub>3</sub> + CD<sub>3</sub>OD

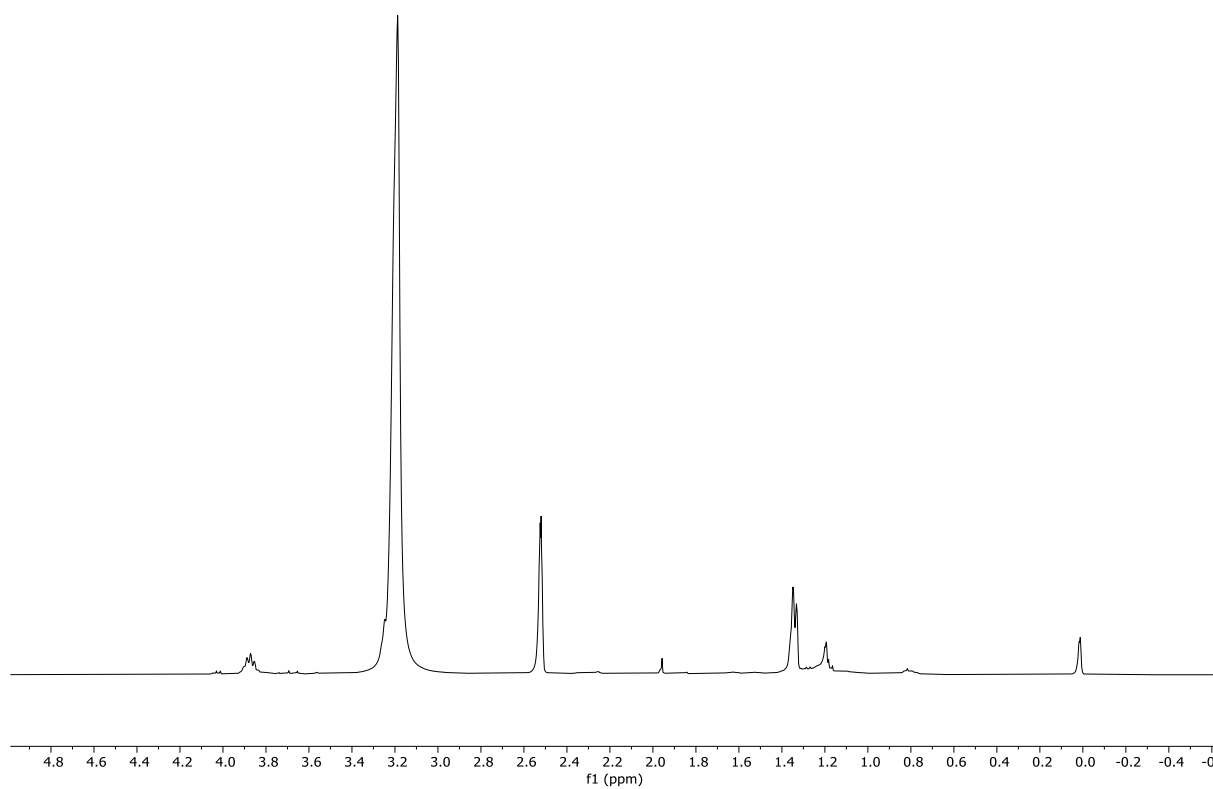

**Figure S58.** <sup>1</sup>H NMR of reaction of DL-alanine with H<sub>2</sub>SO<sub>4</sub>-SiO<sub>2</sub> in CDCl<sub>3</sub> + CD<sub>3</sub>OD

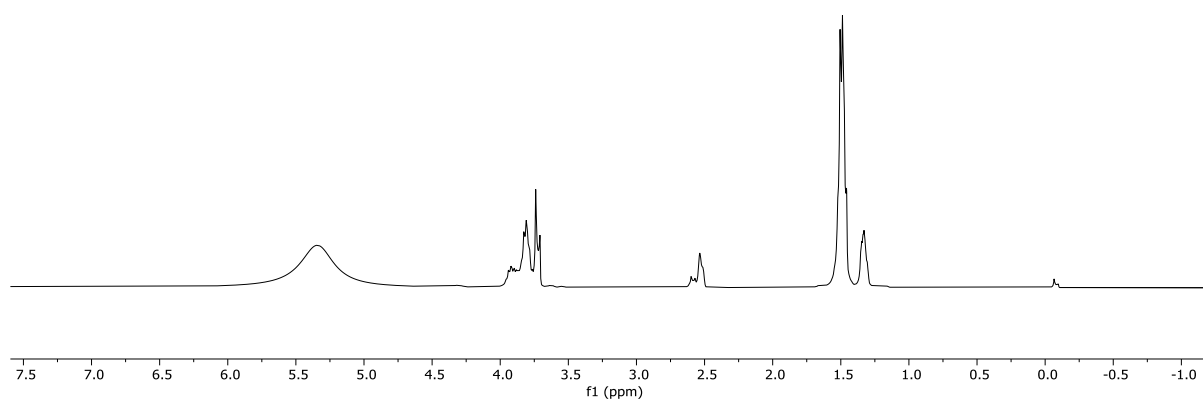

**Figure S59.**  $^1\text{H}$  NMR of reaction of DL-alanine with  $\text{HClO}_4\text{-SiO}_2$  in  $\text{CDCl}_3 + \text{CD}_3\text{OD}$

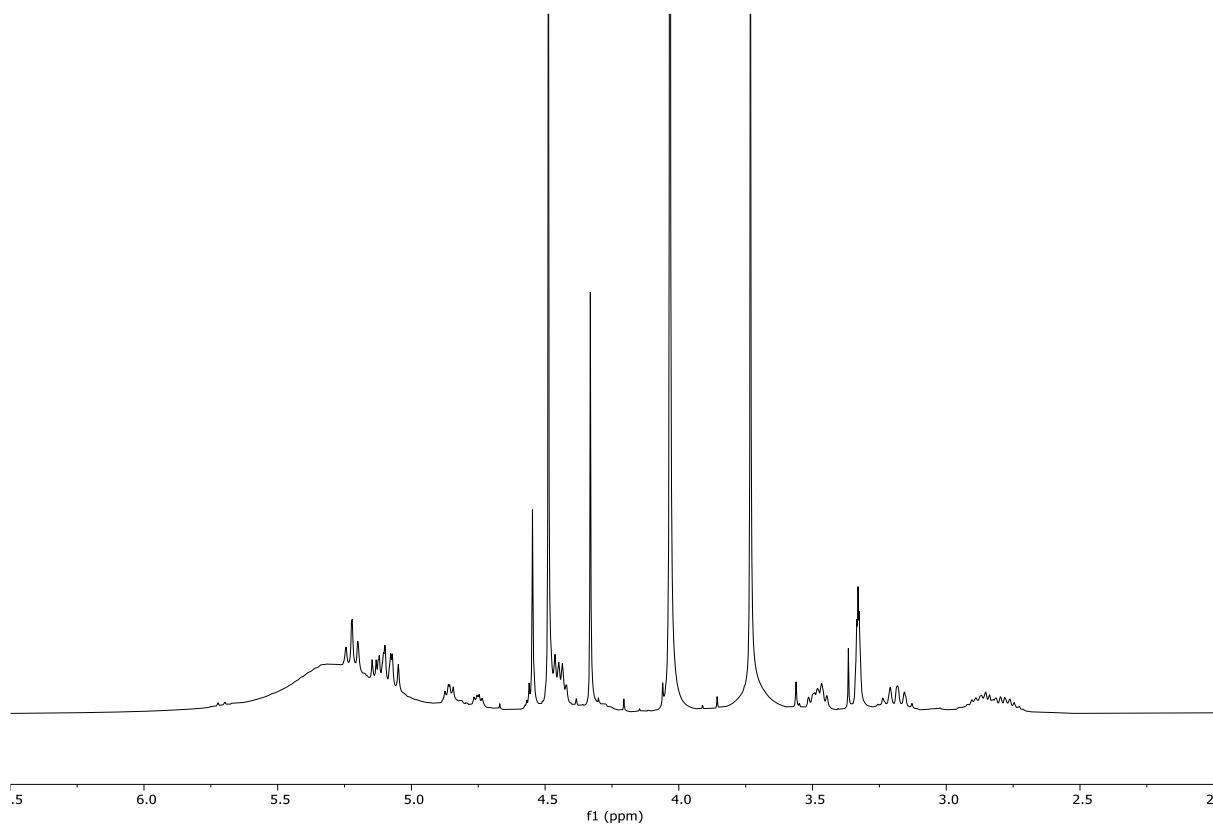

**Figure S60.**  $^1\text{H}$  NMR of decomposition of methionine with  $\text{HClO}_4$  (water as solvent instead of DMC) in  $\text{CDCl}_3 + \text{CD}_3\text{OD}$

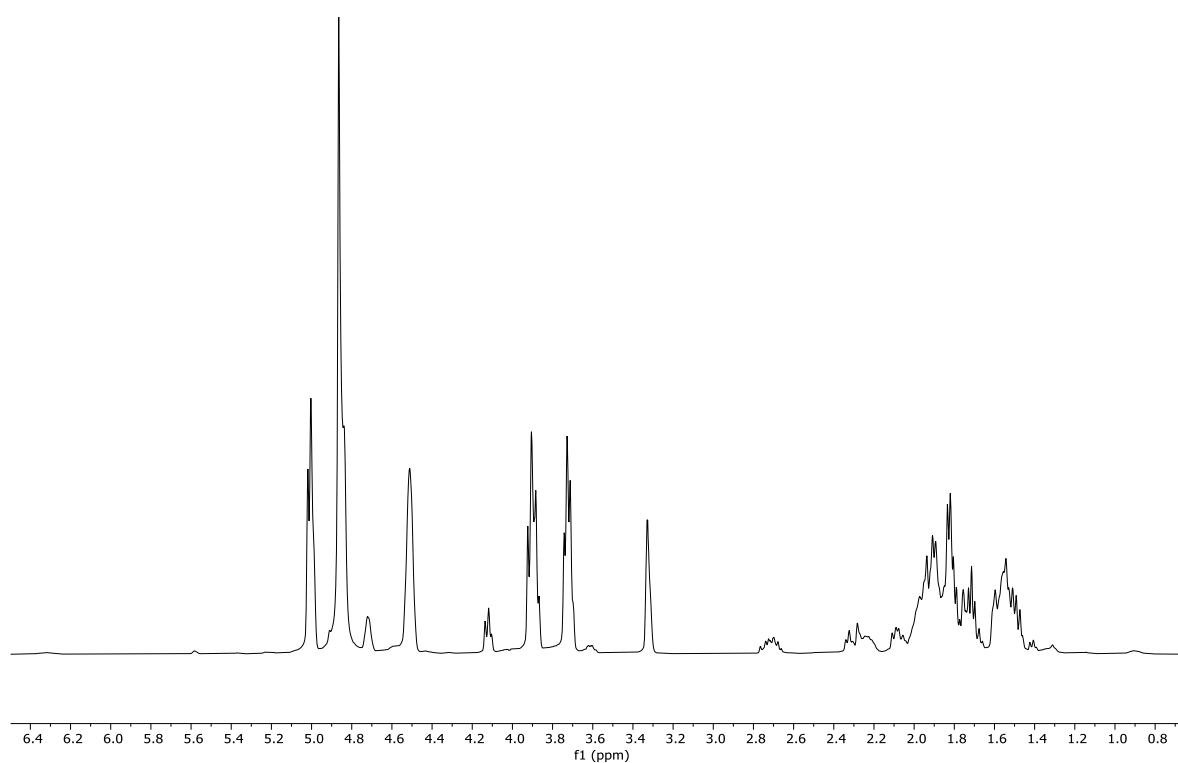

**Figure S61.** <sup>1</sup>H NMR of decomposition of methionine with H<sub>2</sub>SO<sub>4</sub> (water as solvent instead of DMC) in CDCl<sub>3</sub> + CD<sub>3</sub>OD

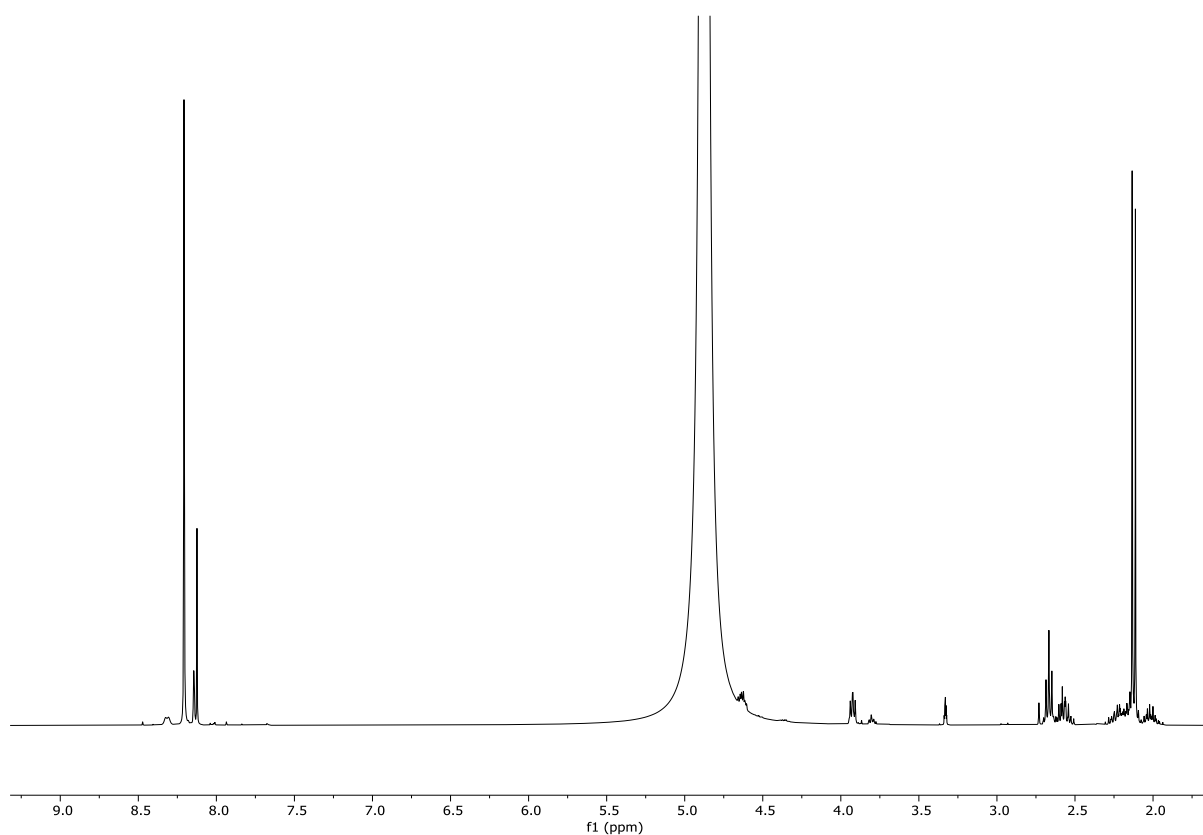

**Figure S62.** <sup>1</sup>H NMR of incomplete reaction of methionine with HCO<sub>2</sub>H (water as solvent instead of DMC) in CDCl<sub>3</sub> + CD<sub>3</sub>OD

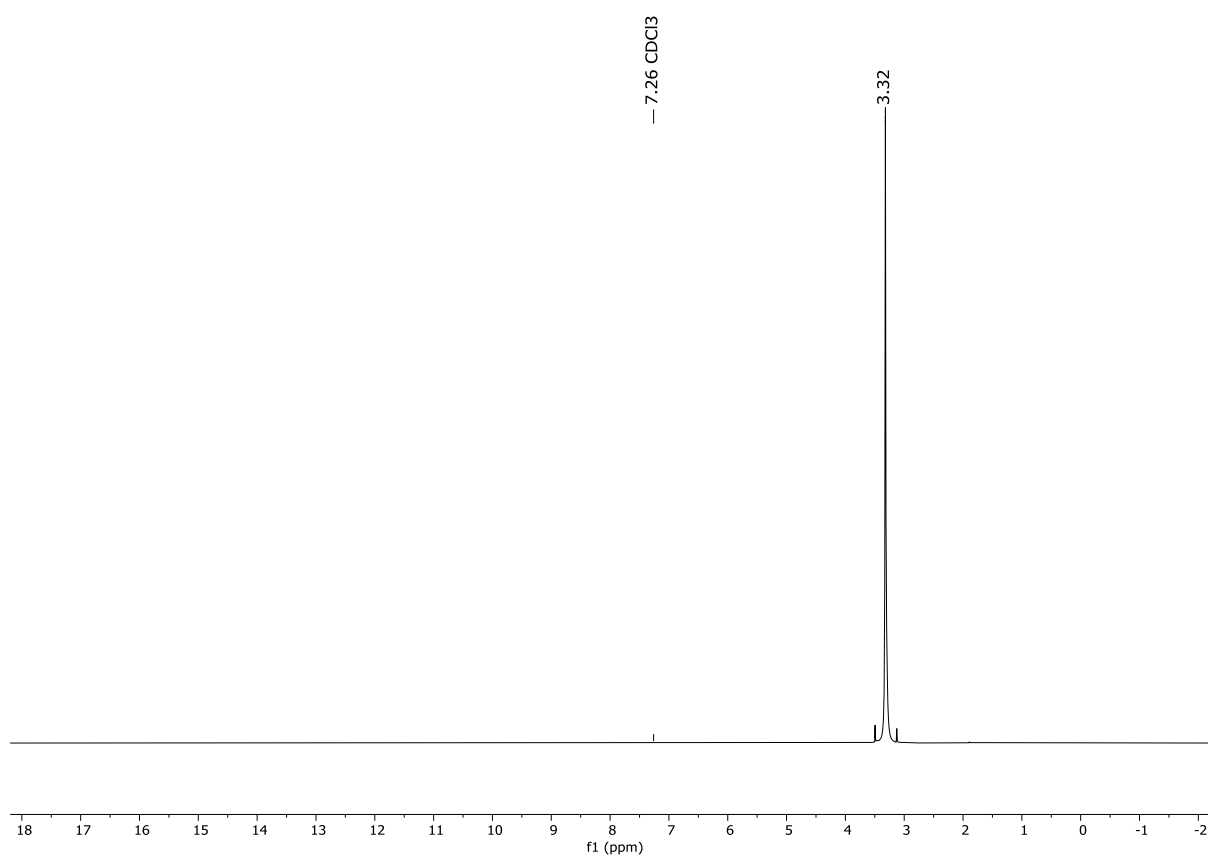

**Figure S63.** <sup>1</sup>H NMR of DMC in CDCl<sub>3</sub>

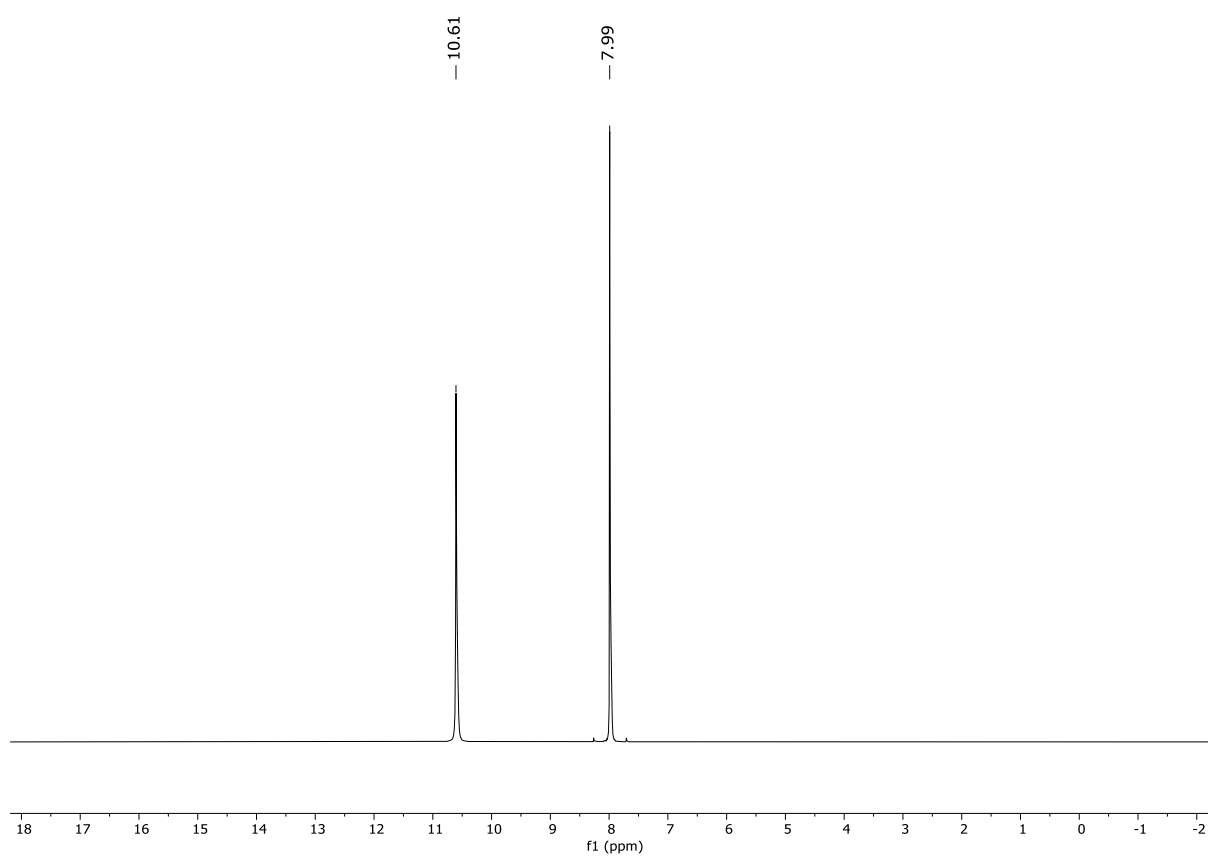

**Figure S64.** <sup>1</sup>H NMR of HCO<sub>2</sub>H in CDCl<sub>3</sub>

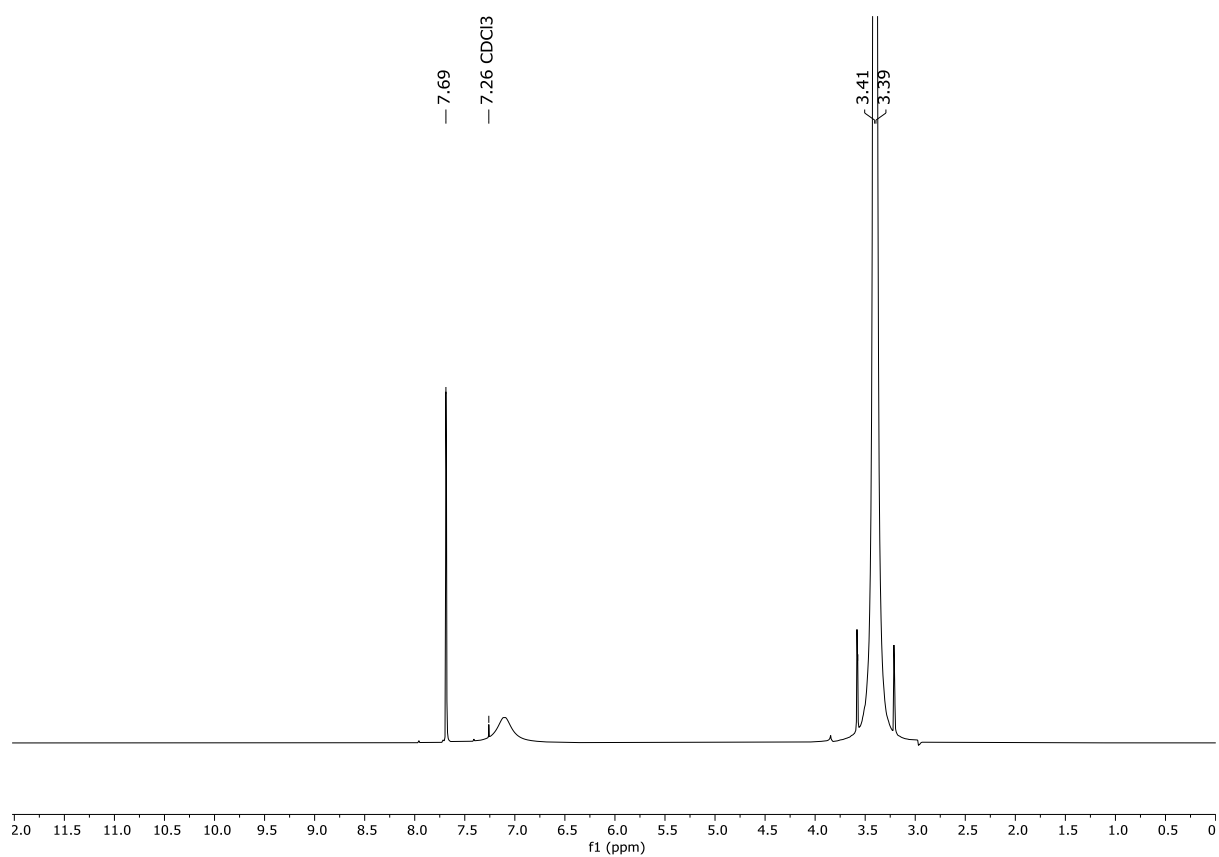

**Figure S65.**  $^1\text{H}$  NMR of reaction of DMC and  $\text{HCO}_2\text{H}$  (20:1) in  $\text{CDCl}_3$

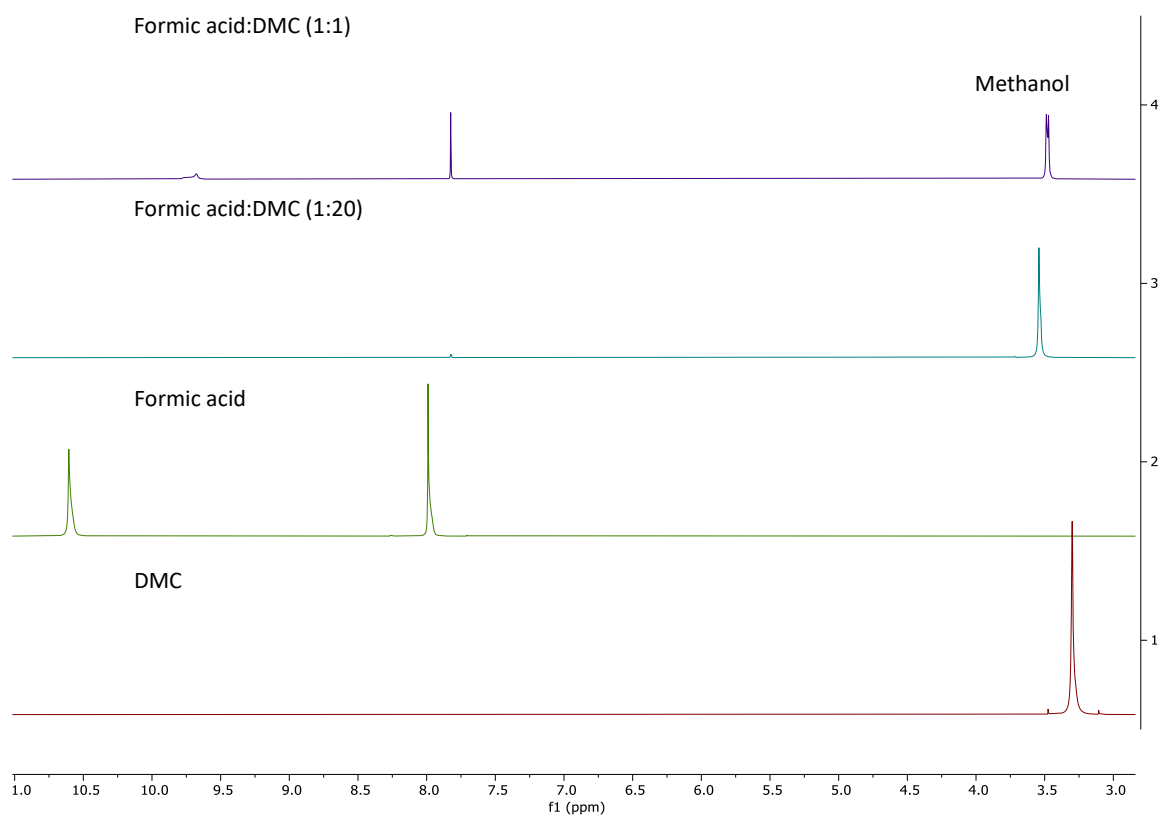

**Figure S66.**  $^1\text{H}$  NMR of reaction of DMC and  $\text{HCO}_2\text{H}$  (1:1) in  $\text{CDCl}_3$

L-alanine methyl ester.  $^1\text{H}$ -NMR ( $\text{CD}_3\text{OD}+\text{CDCl}_3$ ): 4.11-4.05 (t, 1H), 3.83 (s, 3H) 1.57-1.55 (d, 3H).

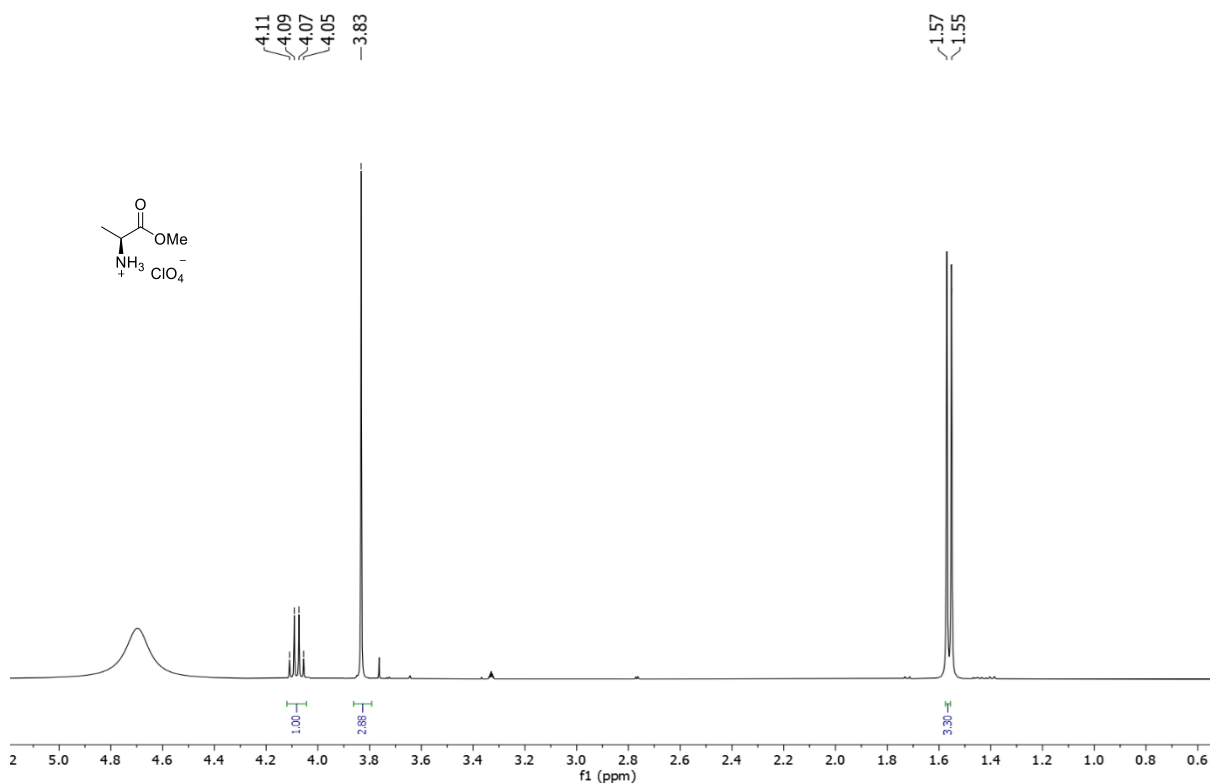

**Figure S67.**  $^1\text{H}$  NMR of L-alanine methyl ester in  $\text{CD}_3\text{OD} + \text{CDCl}_3$

L-leucine methyl ester.  $^1\text{H}$ -NMR ( $\text{CD}_3\text{OD}+\text{CDCl}_3$ ): 4.06-4.02 (t, 1H), 3.85 (s, 3H) 1.85-1.68 (m, 2H), 0.99-0.98 (d, 6H).

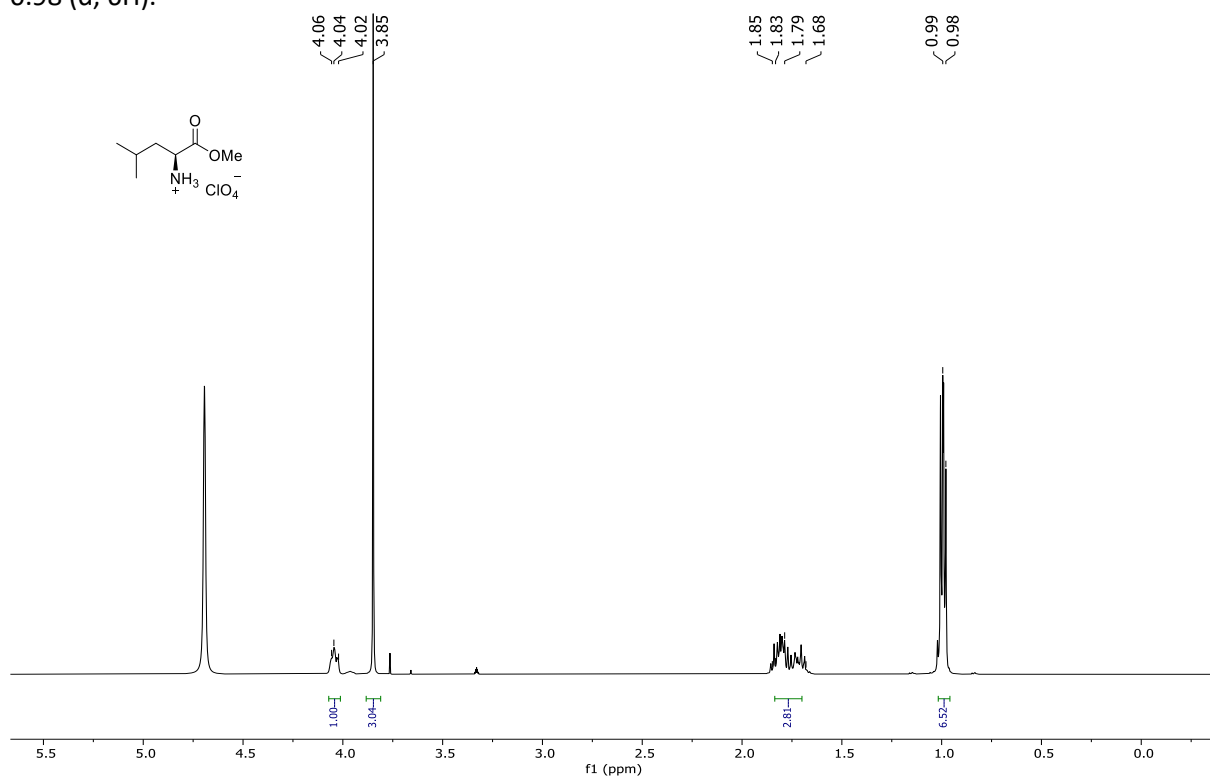

**Figure S68.**  $^1\text{H}$  NMR of L-leucine methyl ester in  $\text{CD}_3\text{OD} + \text{CDCl}_3$

L-proline methyl ester.  $^1\text{H-NMR}$  ( $\text{CD}_3\text{OD}+\text{CDCl}_3$ ): 4.35-4.31 (t, 1H), 3.76 (s, 3H) 3.37-3.28 (m, 2H), 2.40-2.32 (m, 1H), 2.08-1.97 (m, 3H);  $^{13}\text{C-NMR}$ :  $\delta$  169.25, 59.49, 53.26, 46.30, 27.99, 23.21.

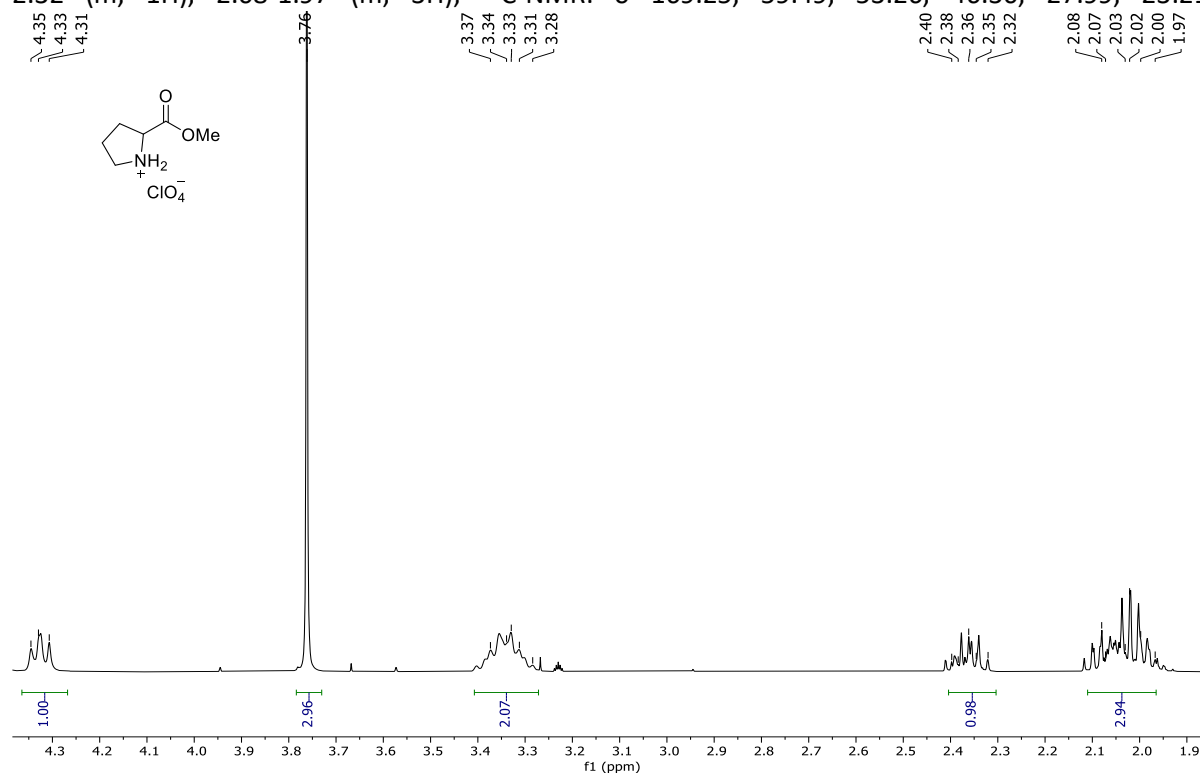

**Figure S69.**  $^1\text{H-NMR}$  of L-proline methyl ester in  $\text{CD}_3\text{OD} + \text{CDCl}_3$

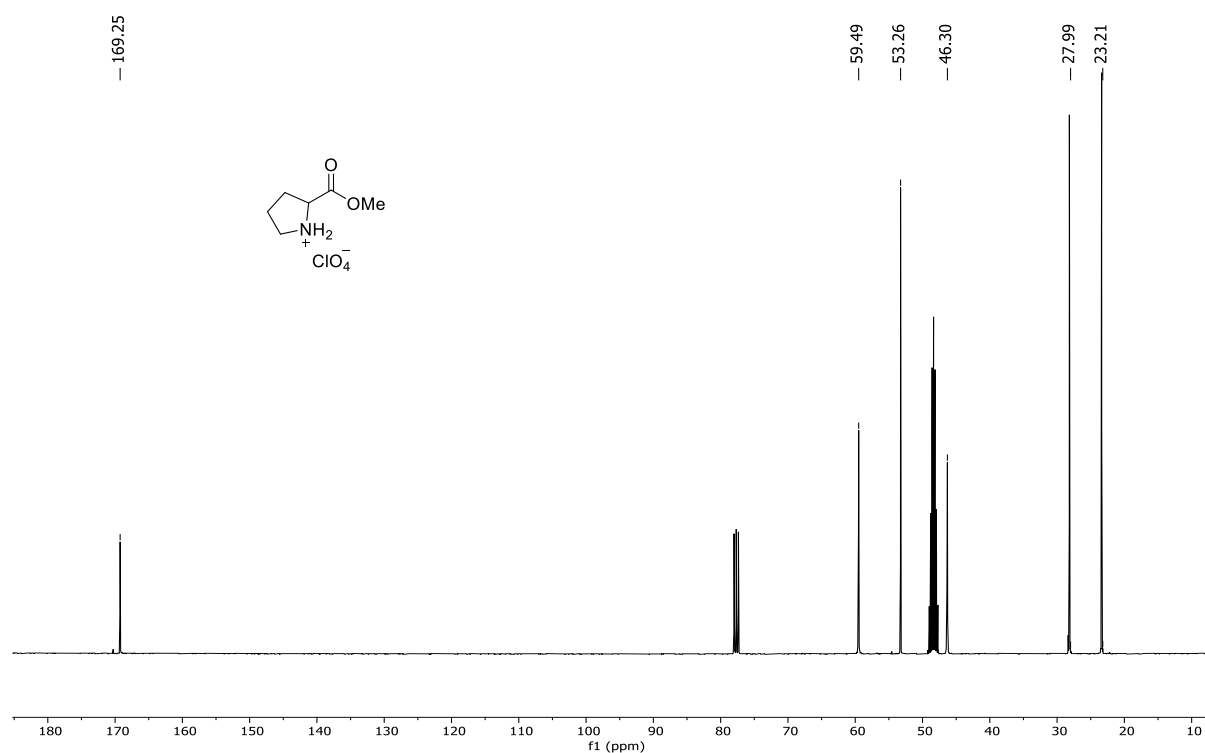

**Figure S70.**  $^{13}\text{C NMR}$  of L-proline methyl ester in  $\text{CD}_3\text{OD} + \text{CDCl}_3$

L-glycine methyl ester.  $^1\text{H}$ -NMR ( $\text{CD}_3\text{OD}+\text{CDCl}_3$ ):  $\delta$  3.82 (brs, 2H), 3.80 (s, 3H);  $^{13}\text{C}$ -NMR:  $\delta$  167.79, 57.92, 40.14.

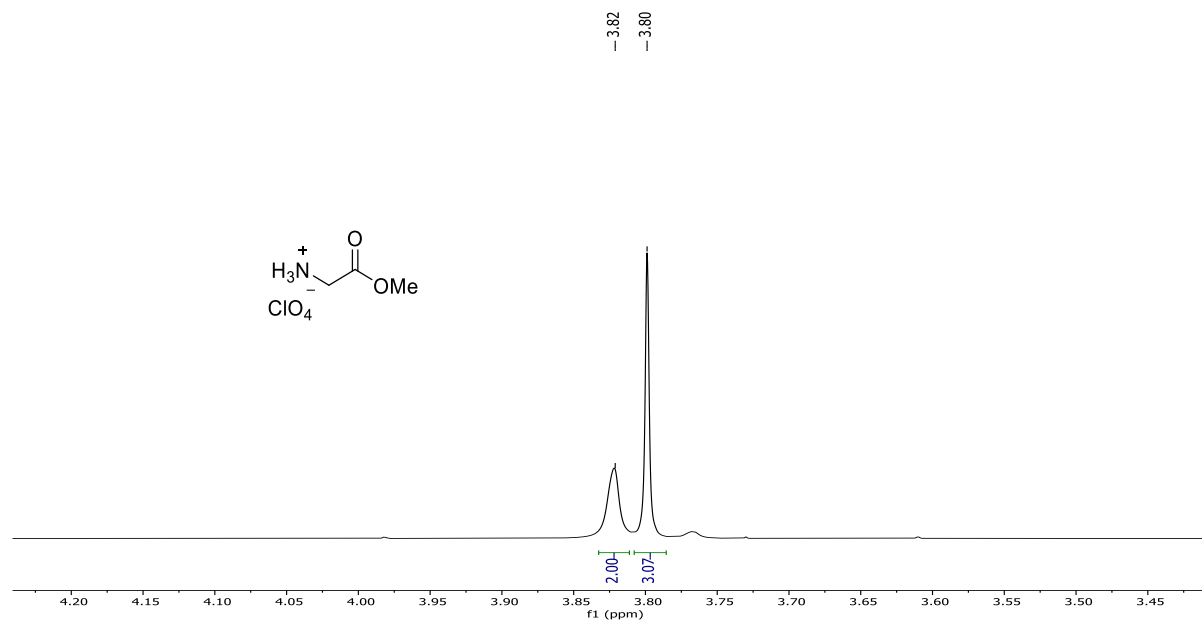

**Figure S71.**  $^1\text{H}$  NMR of L-glycine methyl ester in  $\text{CD}_3\text{OD} + \text{CDCl}_3$

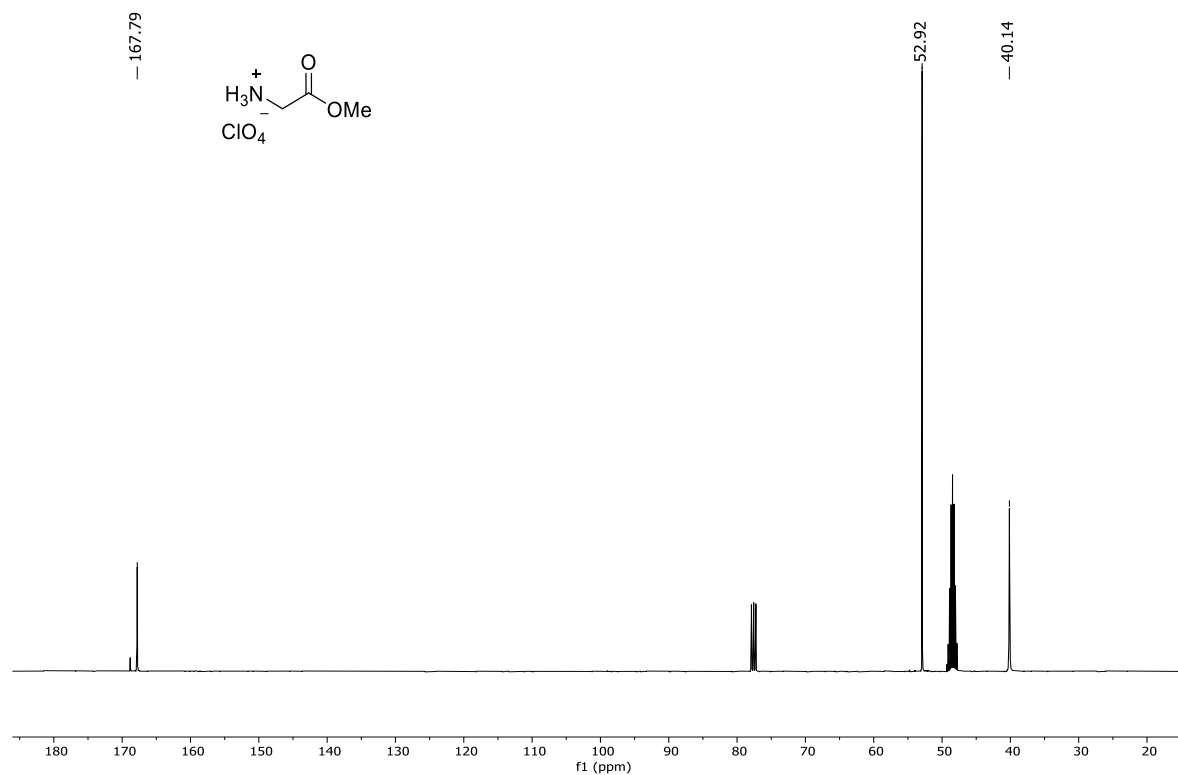

**Figure S72.**  $^{13}\text{C}$  NMR of glycine methyl ester in  $\text{CD}_3\text{OD} + \text{CDCl}_3$

L-histidine methyl ester.  $^1\text{H-NMR}$  ( $\text{CD}_3\text{OD}+\text{CDCl}_3$ ):  $\delta$  8.16 (s, 1H), 7.51 (s, 2H), 4.24-4.18 (t, 1H), 3.76 (s, 3H) 3.26-3.118 (d, 2H);  $^{13}\text{C-NMR}$ :  $\delta$  168.09, 134.63, 127.80, 117.94, 53.22, 51.87, 25.73.

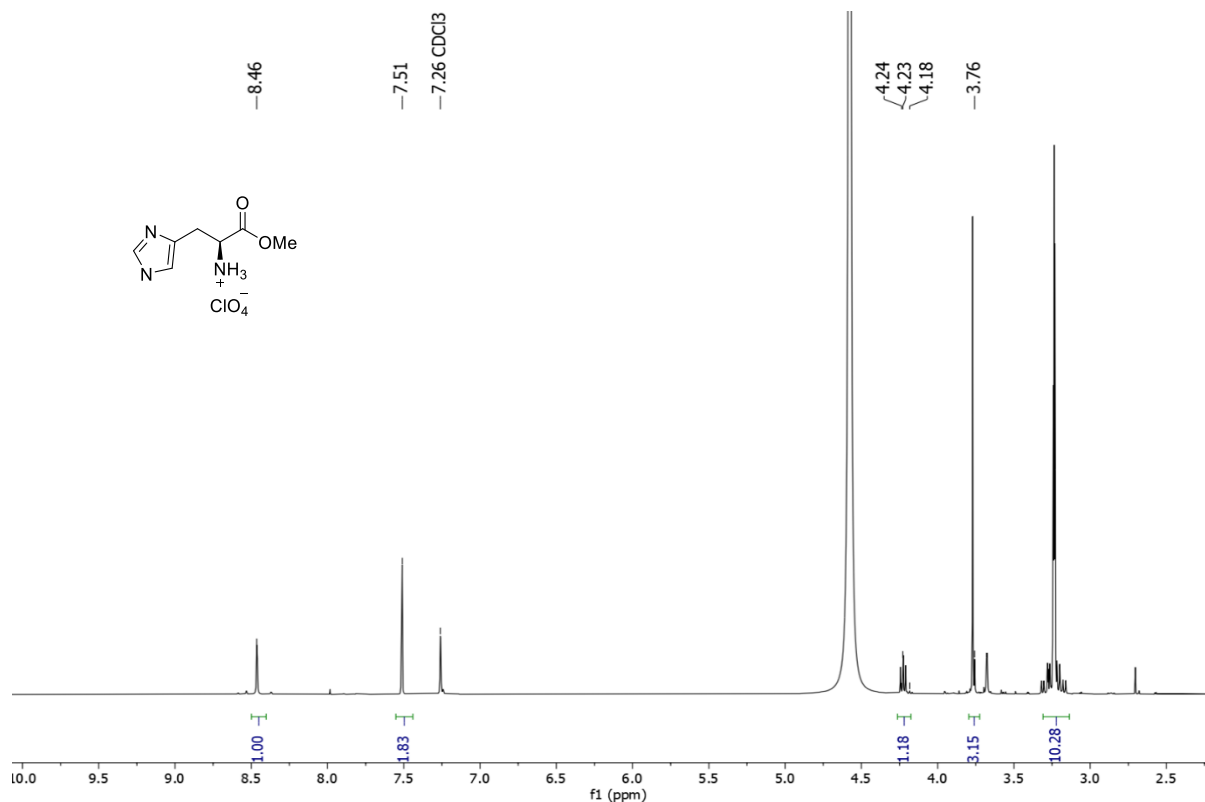

**Figure S73.**  $^1\text{H-NMR}$  of L-histidine methyl ester in  $\text{CD}_3\text{OD}$

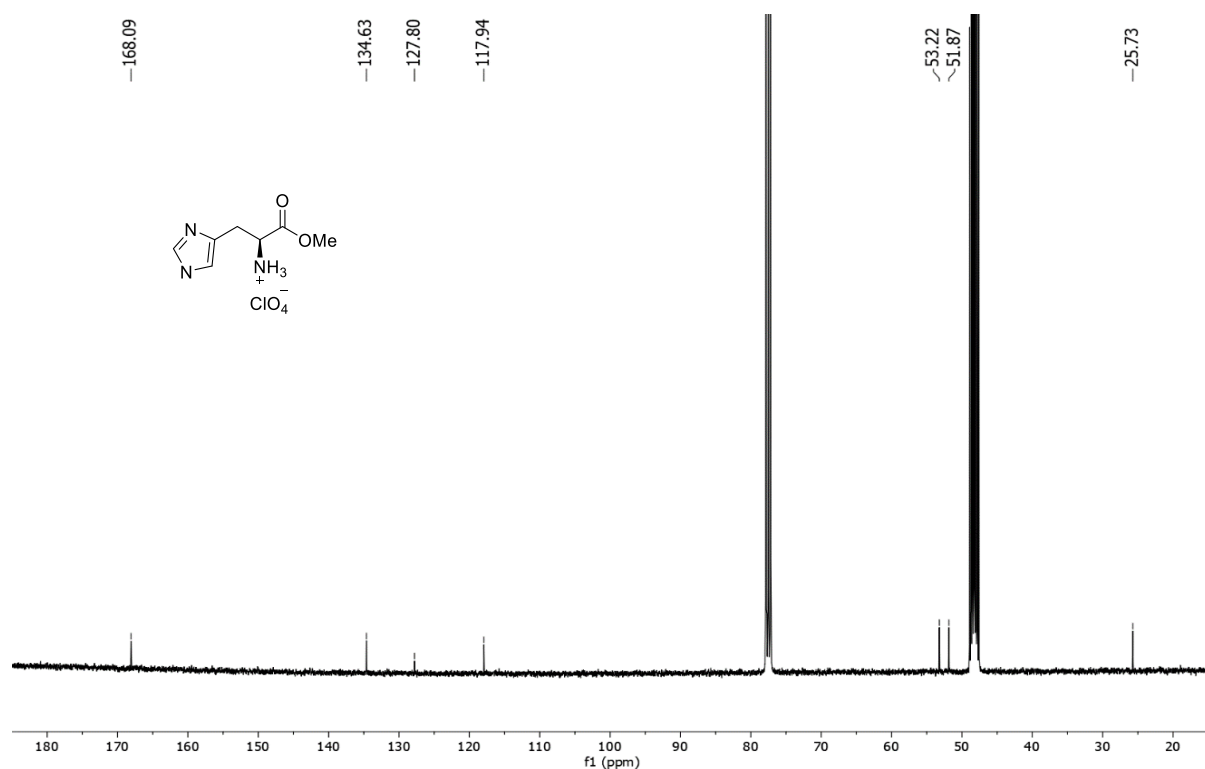

**Figure S74.**  $^{13}\text{C-NMR}$  of L-histidine methyl ester in  $\text{CD}_3\text{OD}$

L-tyrosine methyl ester.  $^1\text{H-NMR}$  ( $\text{CD}_3\text{OD}+\text{CDCl}_3$ ):  $\delta$  7.24-7.21 (d, 2H), 6.98-6.95 (d, 2H), 4.40-4.36 (t, 1H), 3.96 (s, 3H) 3.26-3.118 (d, 2H);  $^{13}\text{C-NMR}$ :  $\delta$  168.92, 156.11, 130.21, 124.06, 115.54, 54.35, 52.98, 35.29.

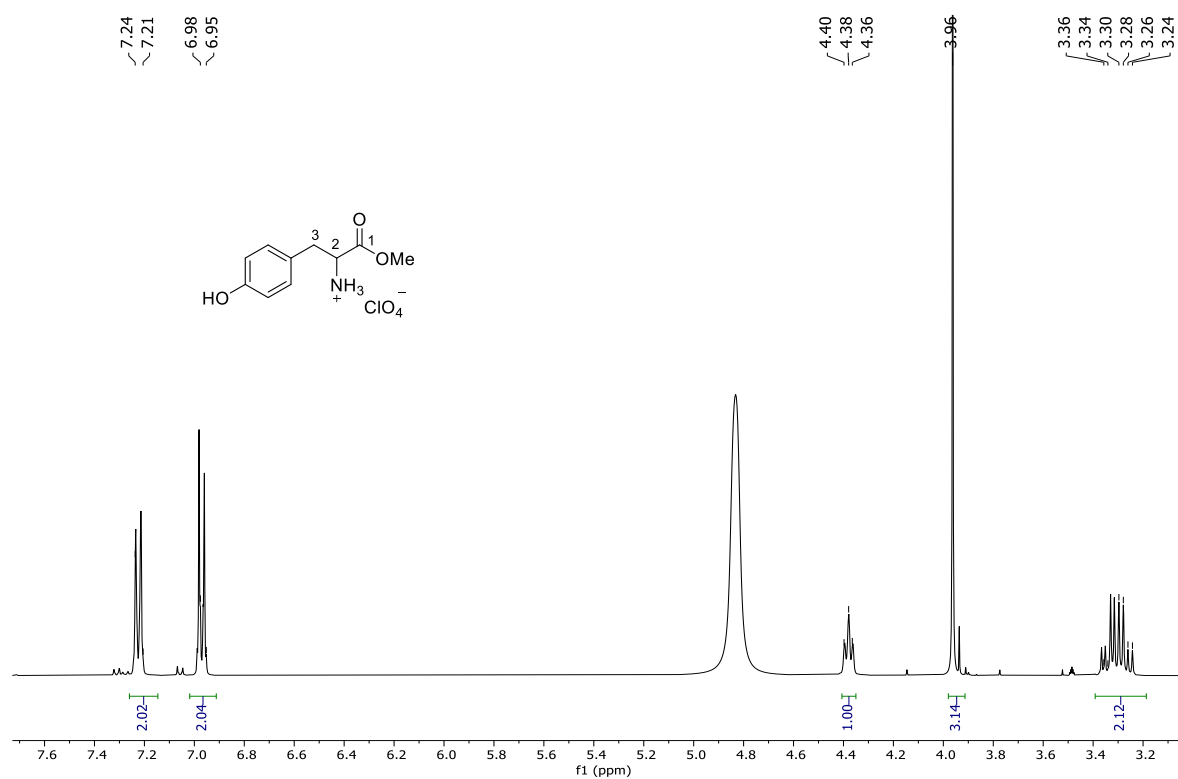

**Figure S75.**  $^1\text{H}$  NMR of L-tyrosine methyl ester in  $\text{CD}_3\text{OD} + \text{CDCl}_3$

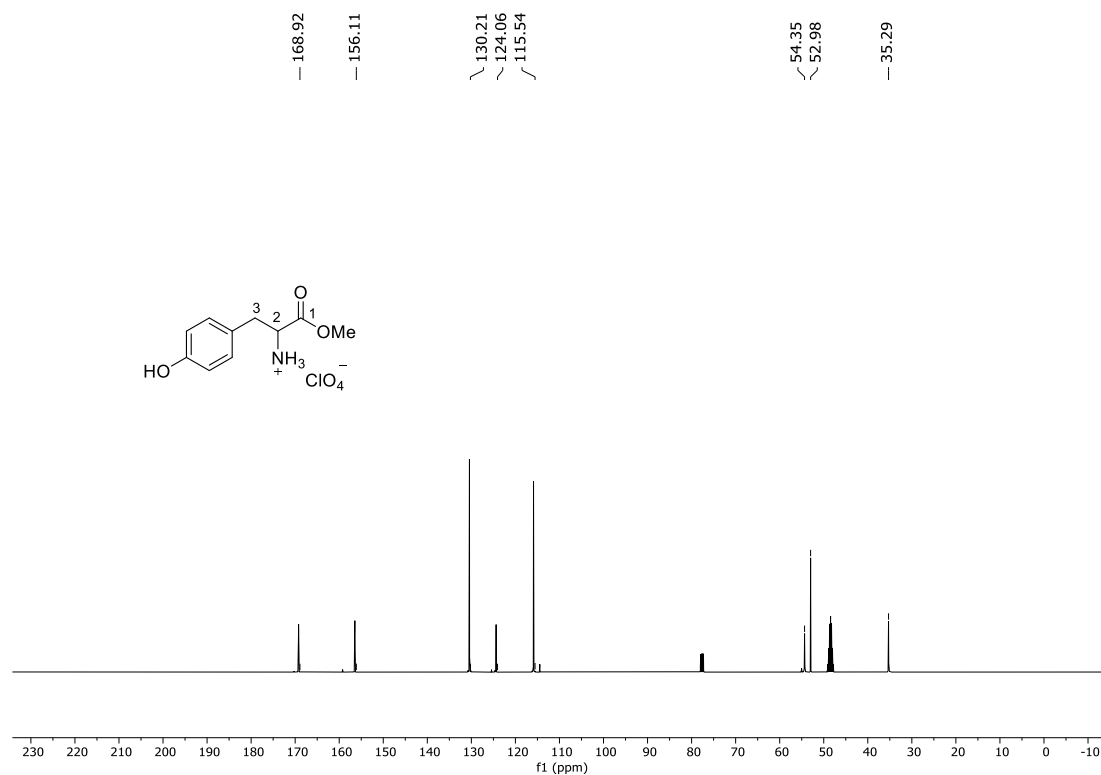

**Figure S76.**  $^{13}\text{C}$  NMR of L-tyrosine methyl ester in  $\text{CD}_3\text{OD} + \text{CDCl}_3$

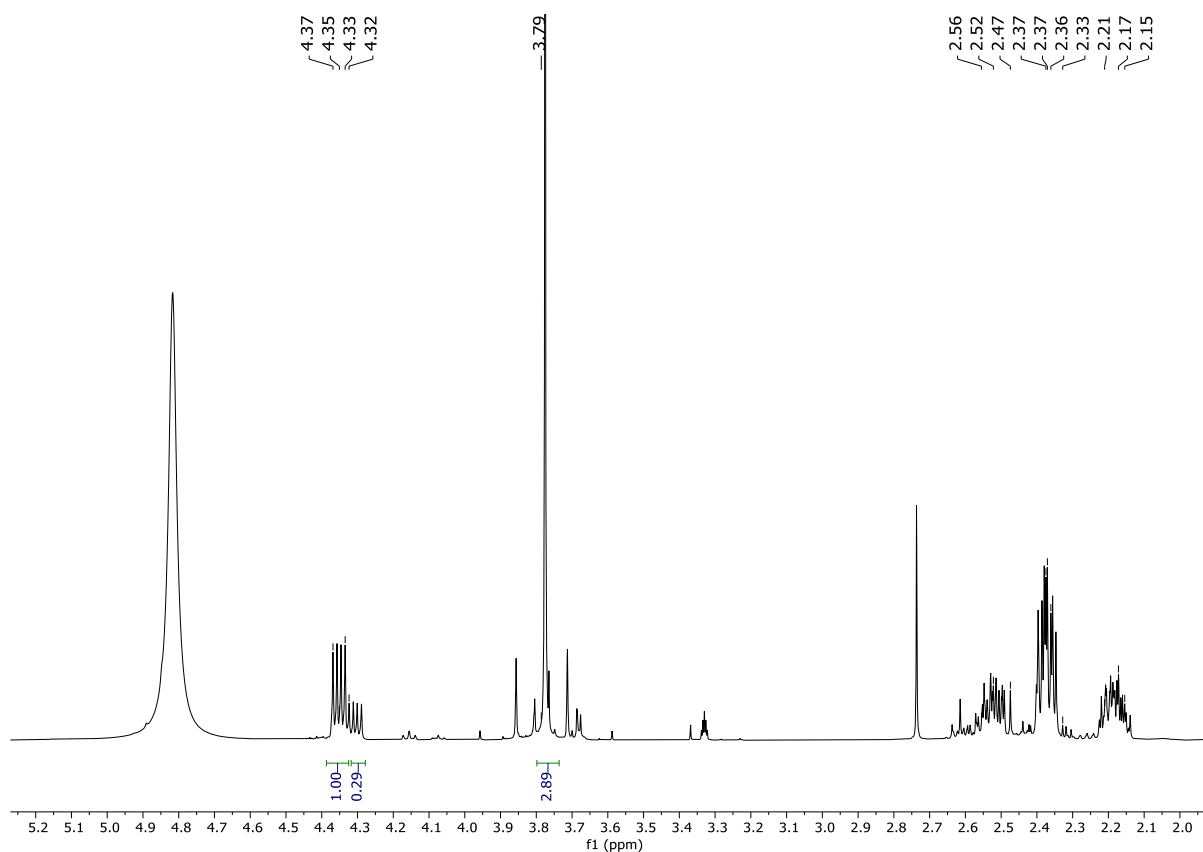

**Figure S77.** <sup>1</sup>H NMR of L-glutamine methyl ester in CD<sub>3</sub>OD + CDCl<sub>3</sub>

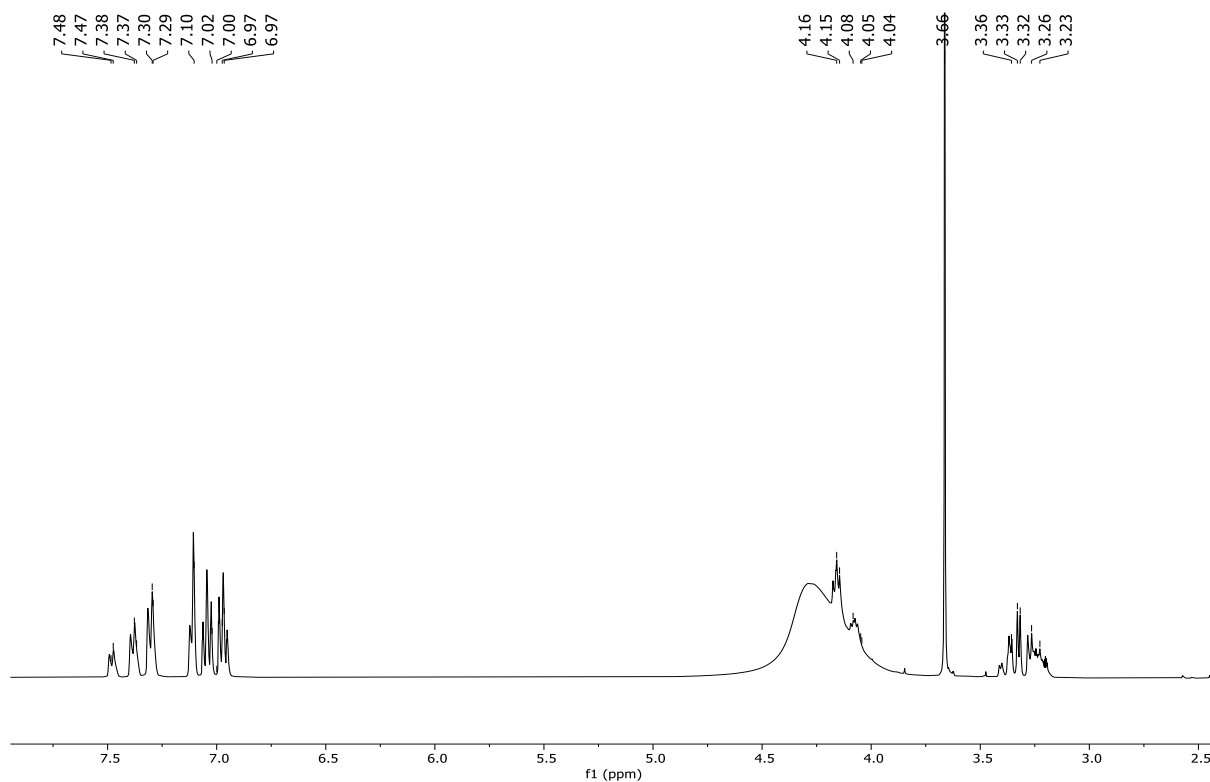

**Figure S78.** <sup>1</sup>H NMR of L-tryptophan methyl ester in CD<sub>3</sub>OD + CDCl<sub>3</sub>

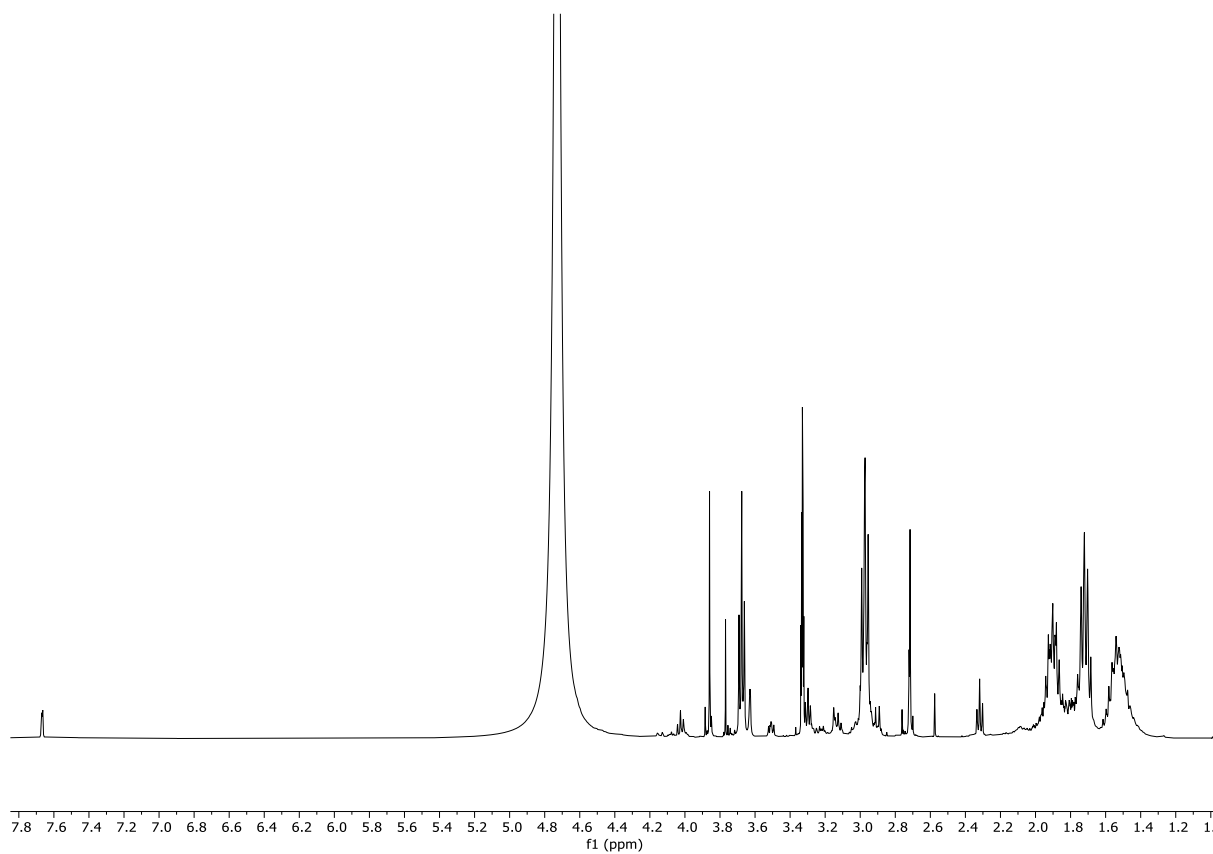

**Figure S79.**  $^1\text{H}$  NMR of L-lysine in  $\text{HClO}_4$  condition

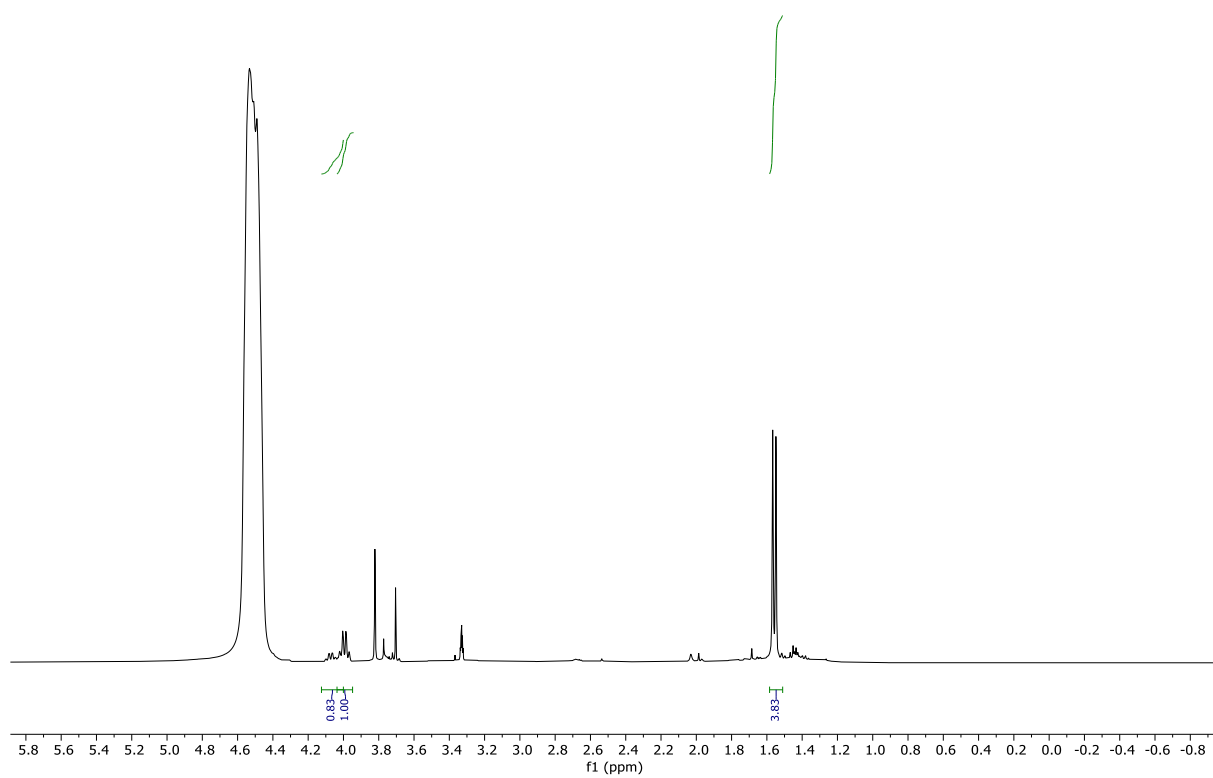

**Figure S80.**  $^1\text{H}$  NMR of L-cystine in  $\text{HClO}_4$  condition

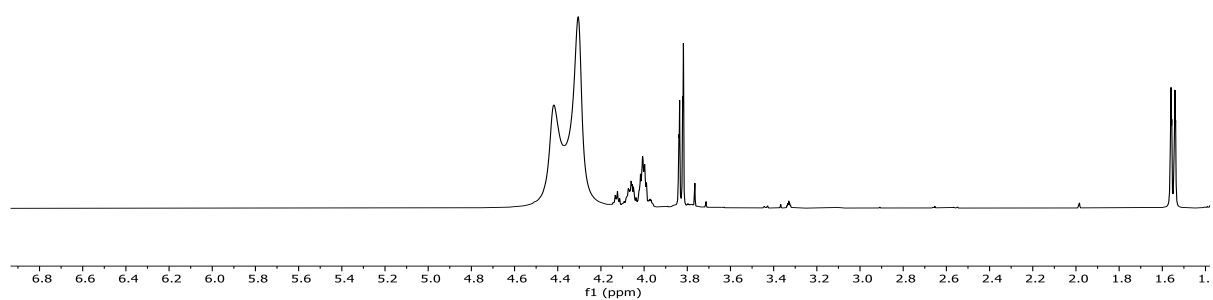

**Figure S81.**  $^1\text{H}$  NMR of D-serine  $\text{HClO}_4$  condition

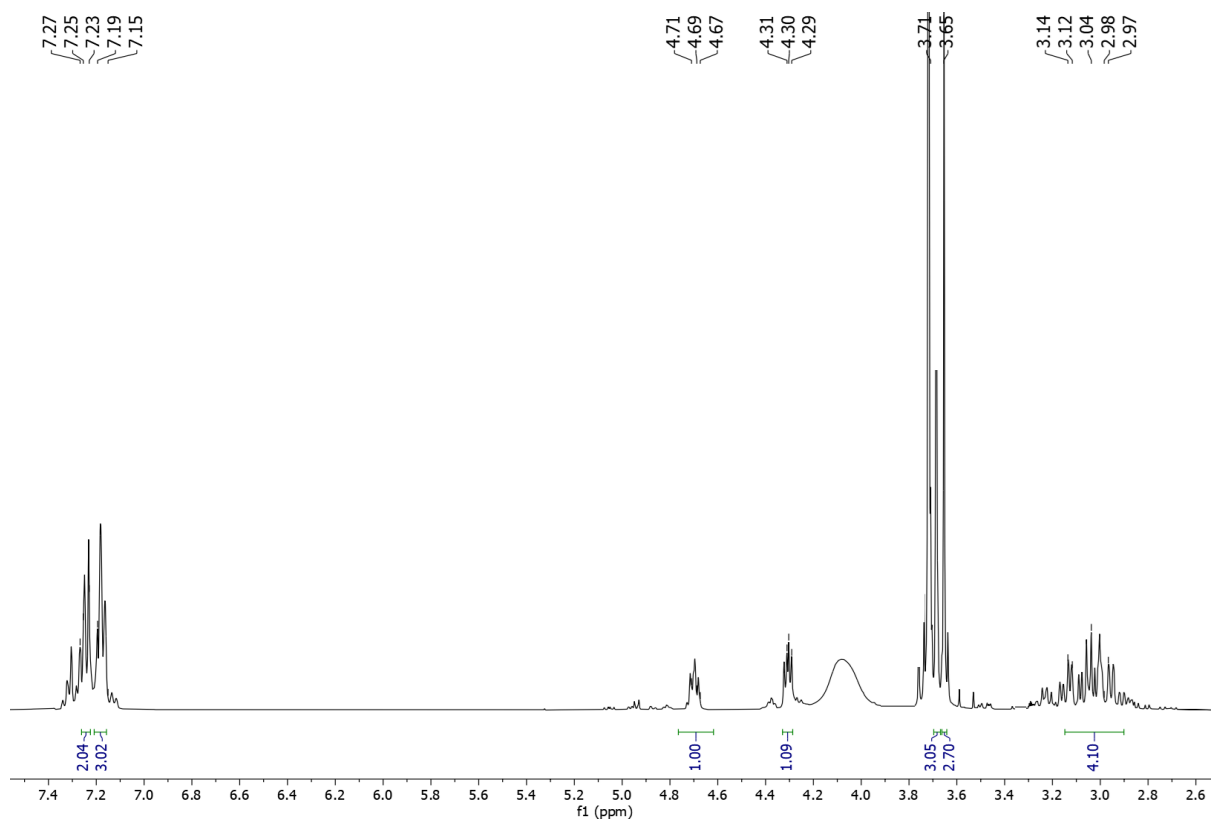

**Figure S82.**  $^1\text{H}$  NMR of aspartame in  $\text{HClO}_4$

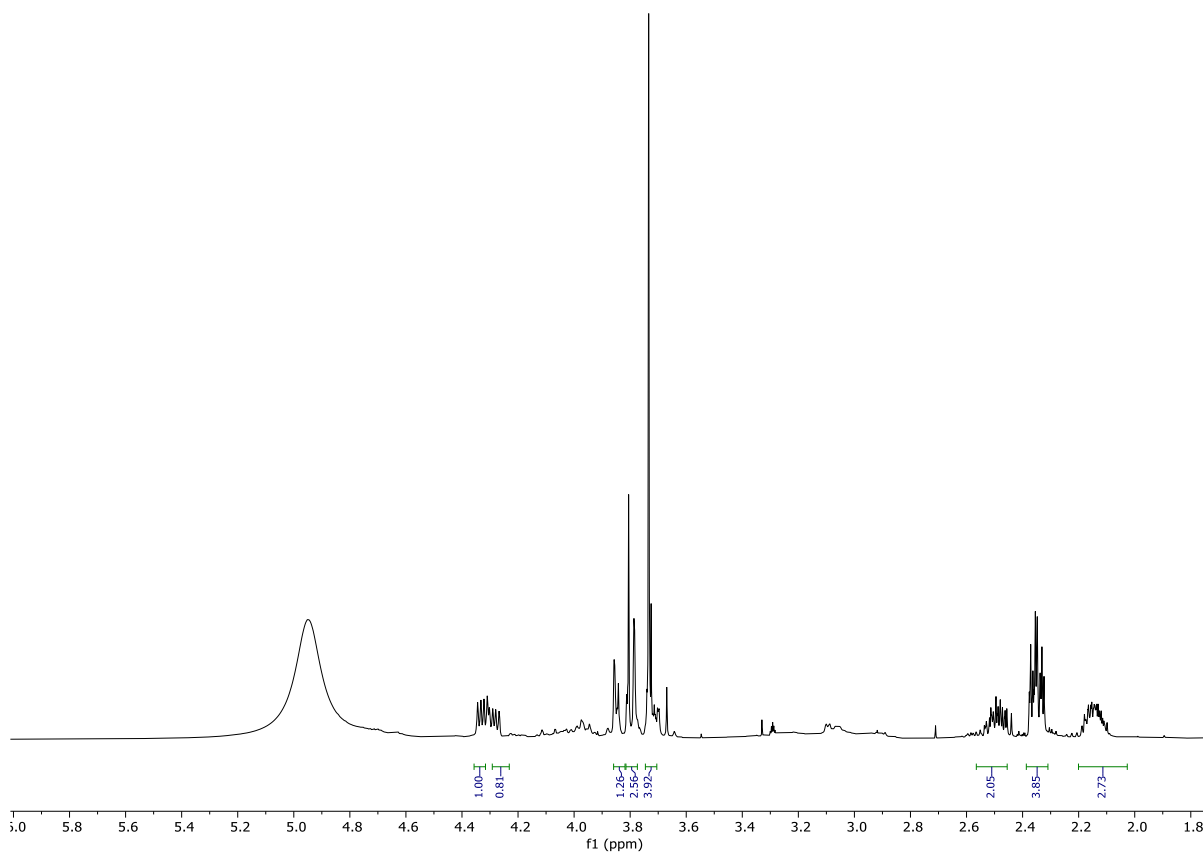

**Figure S83.**  $^1\text{H}$  NMR of L-glutathione in  $\text{HClO}_4$  condition

*N*-methyl-L-alanine methyl ester ammonium.  $^1\text{H}$ -NMR ( $\text{CD}_3\text{OD}+\text{CDCl}_3$ ): 4.01-3.97 (q, 1H), 3.71(s, 3H), 3.52 (s, 3H), 1.44-1.43 (d, 3H);  $^{13}\text{C}$ -NMR:  $\delta$  167.83, 54.57, 52.70, 40.03.

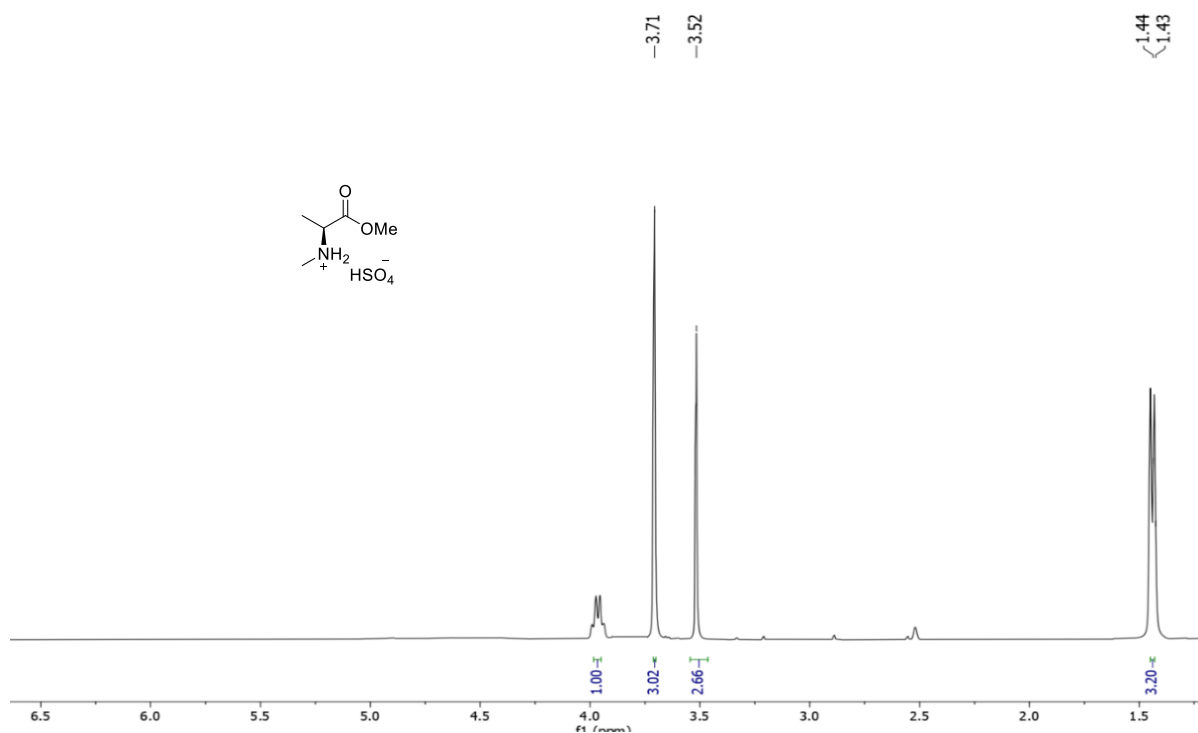

**Figure S84**  $^1\text{H}$  NMR of L-*N*-methyl alanine methyl ester ammonium in  $\text{CD}_3\text{OD} + \text{CDCl}_3$

*N*-methyl-L-leucine methyl ester ammonium.  $^1\text{H}$ -NMR ( $\text{CD}_3\text{OD}+\text{CDCl}_3$ ): 3.93 (brs, 1H), 3.76(s, 3H), 3.66 (s, 3H), 1.75-1.68 (m, 3H), 0.89-0.88 (d, 6H).

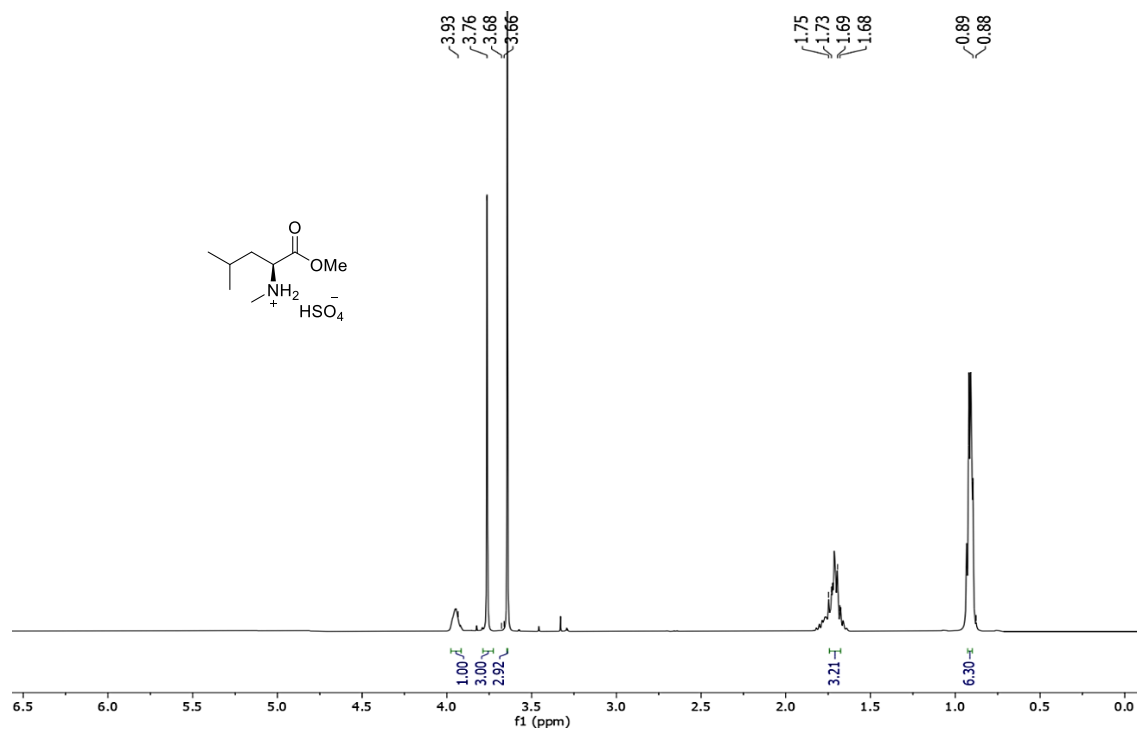

**Figure S85**  $^1\text{H}$  NMR of L-*N*-methyl alanine methyl ester ammonium in  $\text{CD}_3\text{OD} + \text{CDCl}_3$

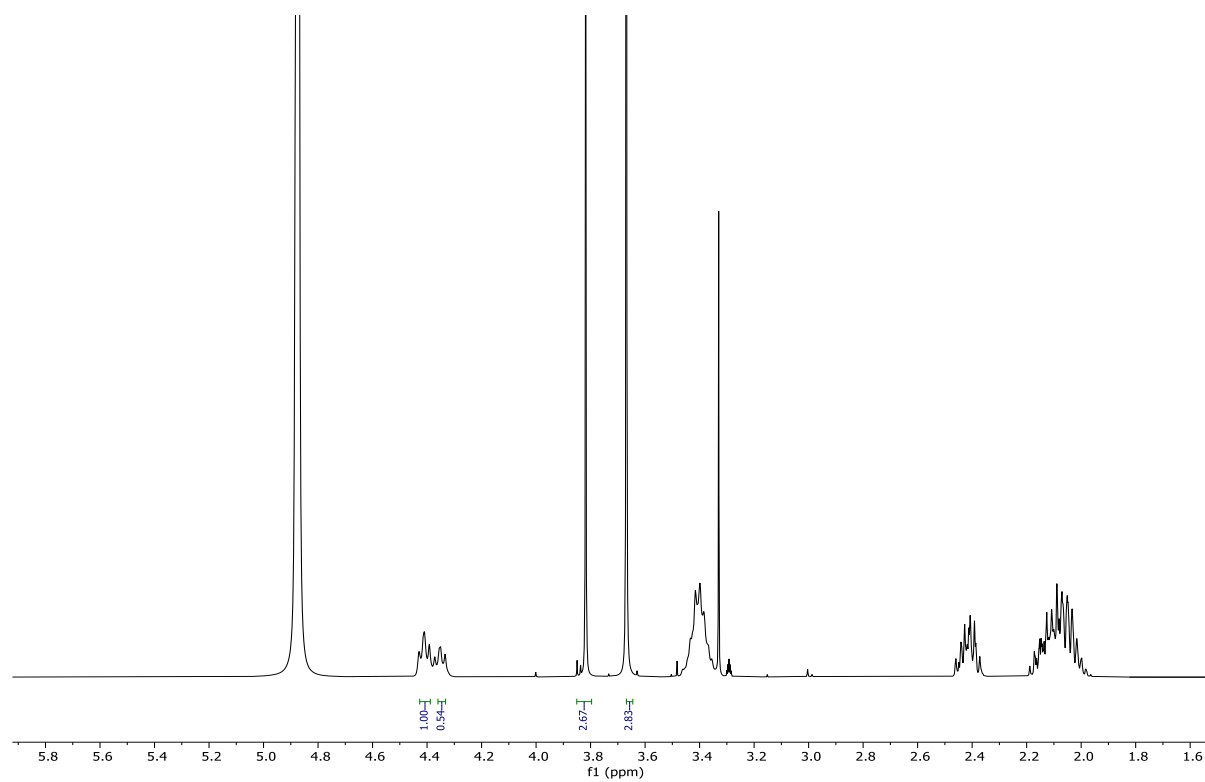

**Figure S86**  $^1\text{H}$  NMR of L-*N*-methyl Proline in  $\text{H}_2\text{SO}_4$

*N*-methyl-L-glycine methyl ester ammonium.  $^1\text{H}$ -NMR ( $\text{CD}_3\text{OD}+\text{CDCl}_3$ ): 3.83 (brs, 2H), 3.79(s, 3H), 3.66 (s, 3H);  $^{13}\text{C}$ -NMR:  $\delta$  167.83, 54.57, 52.70, 40.03.

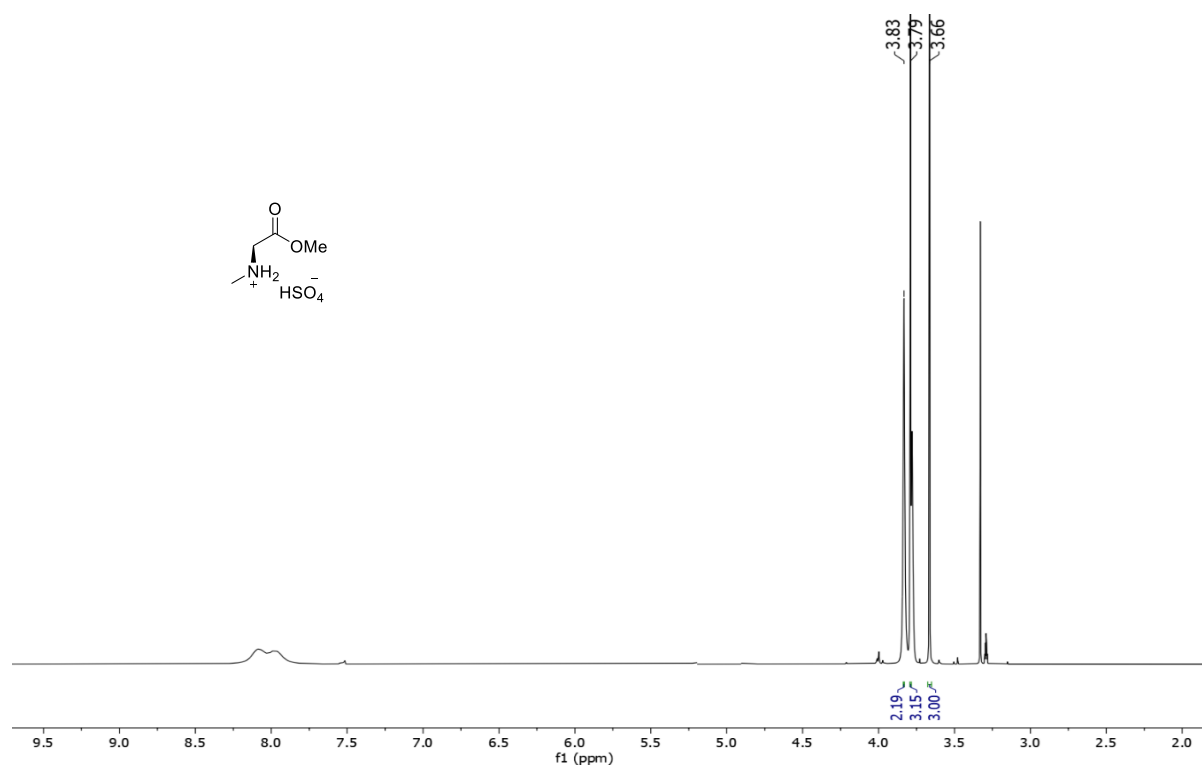

**Figure S87**  $^1\text{H}$  NMR of L-*N*-methyl glycine methyl ester ammonium in  $\text{CD}_3\text{OD} + \text{CDCl}_3$

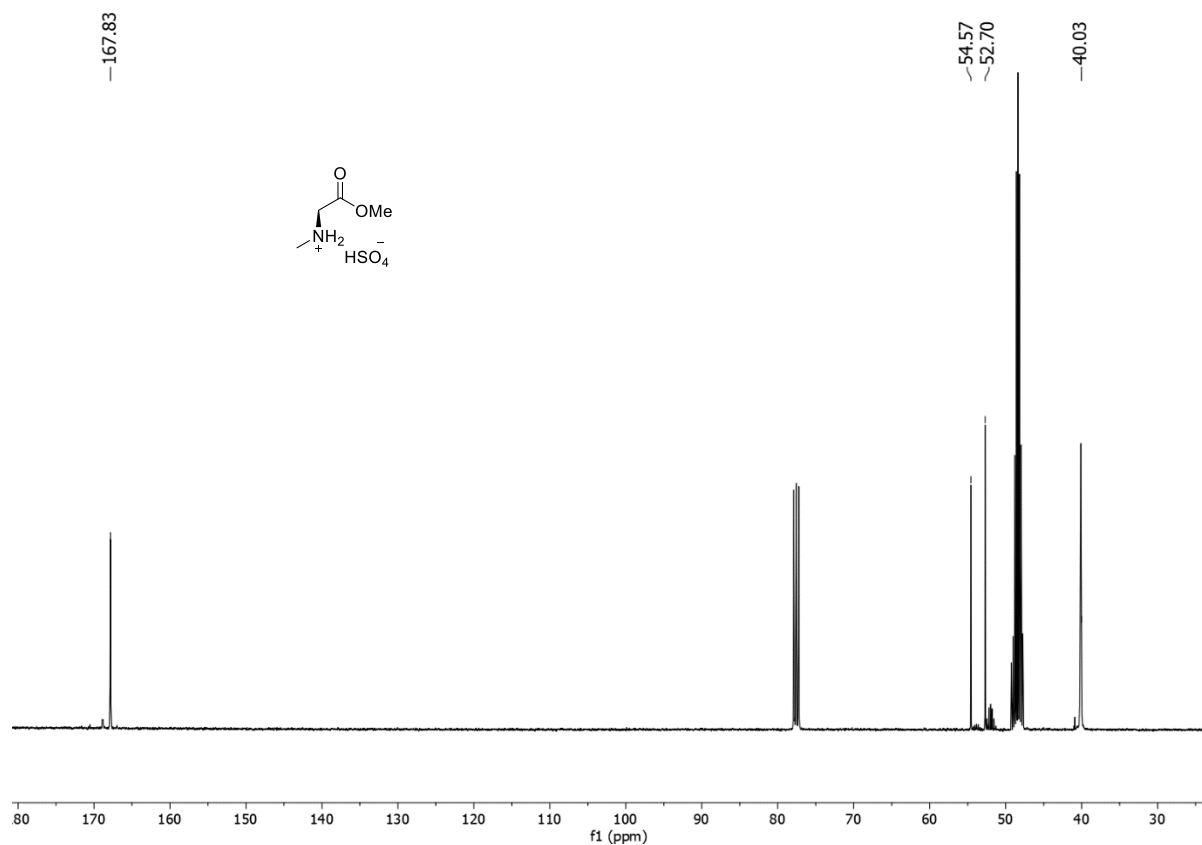

**Figure S88**  $^{13}\text{C}$  NMR of L-*N*-methyl glycine methyl ester ammonium in  $\text{CD}_3\text{OD} + \text{CDCl}_3$

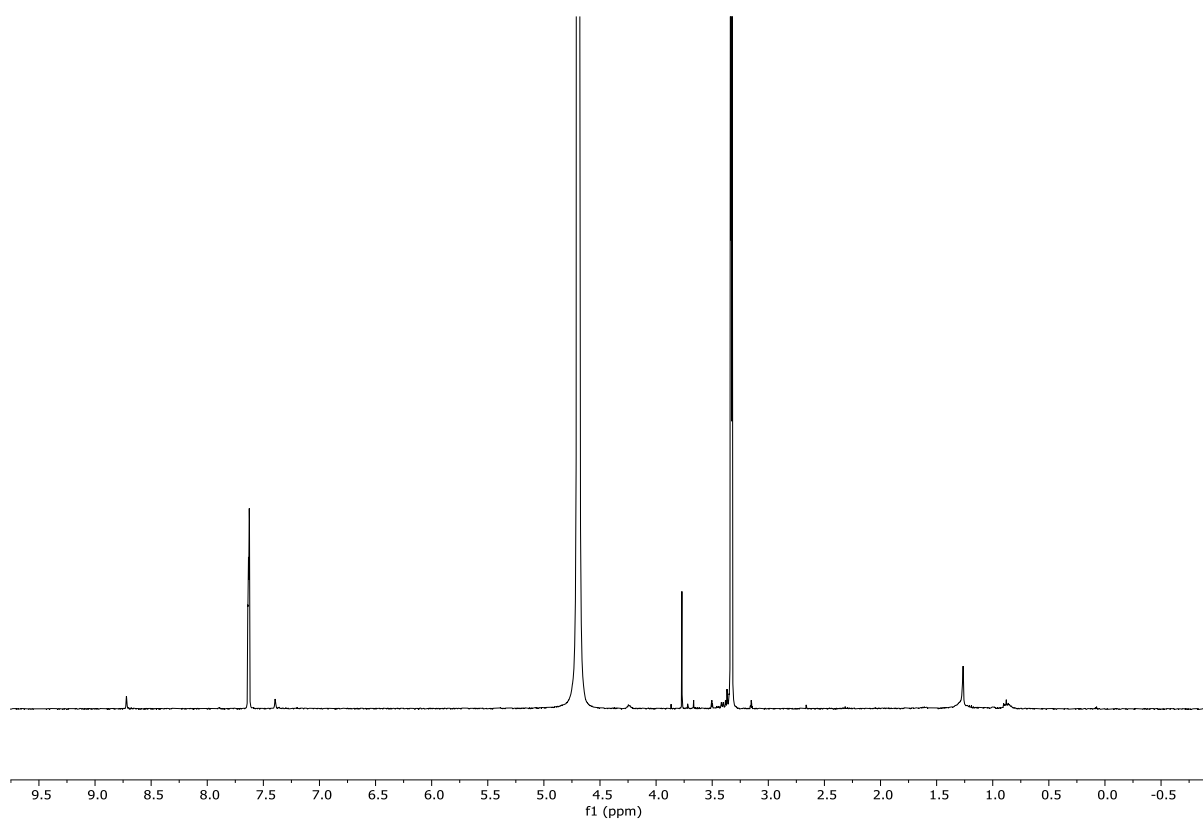

**Figure S89.**  $^1\text{H}$  NMR of L-histidine in  $\text{H}_2\text{SO}_4$

*N*-methyl-L-tyrosine methyl ester ammonium.  $^1\text{H}$ -NMR ( $\text{CD}_3\text{OD}+\text{CDCl}_3$ ): 7.26-7.22 (d, 2H), 7.00-6.98 (d, 2H), 4.40-4.37(t, 1H), 3.96 (s, 3H) 3.90 (s, 3H), 3.35-3.33 (m, 2H);  $^{13}\text{C}$ -NMR:  $\delta$  168.99, 156.62, 130.36, 124.26, 116.06, 54.50, 54.23, 52.72, 35.33.

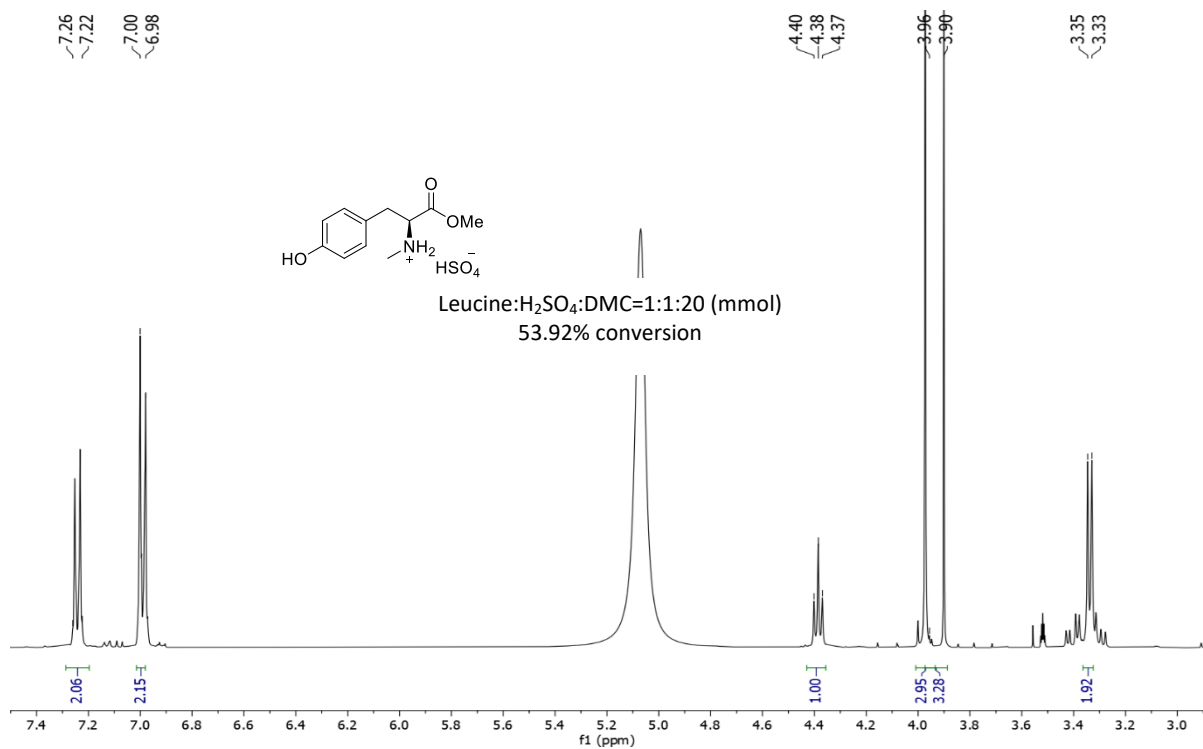

**Figure S90**  $^1\text{H}$  NMR of *N*-methyl-L- tyrosine methyl ester ammonium in  $\text{CD}_3\text{OD} + \text{CDCl}_3$

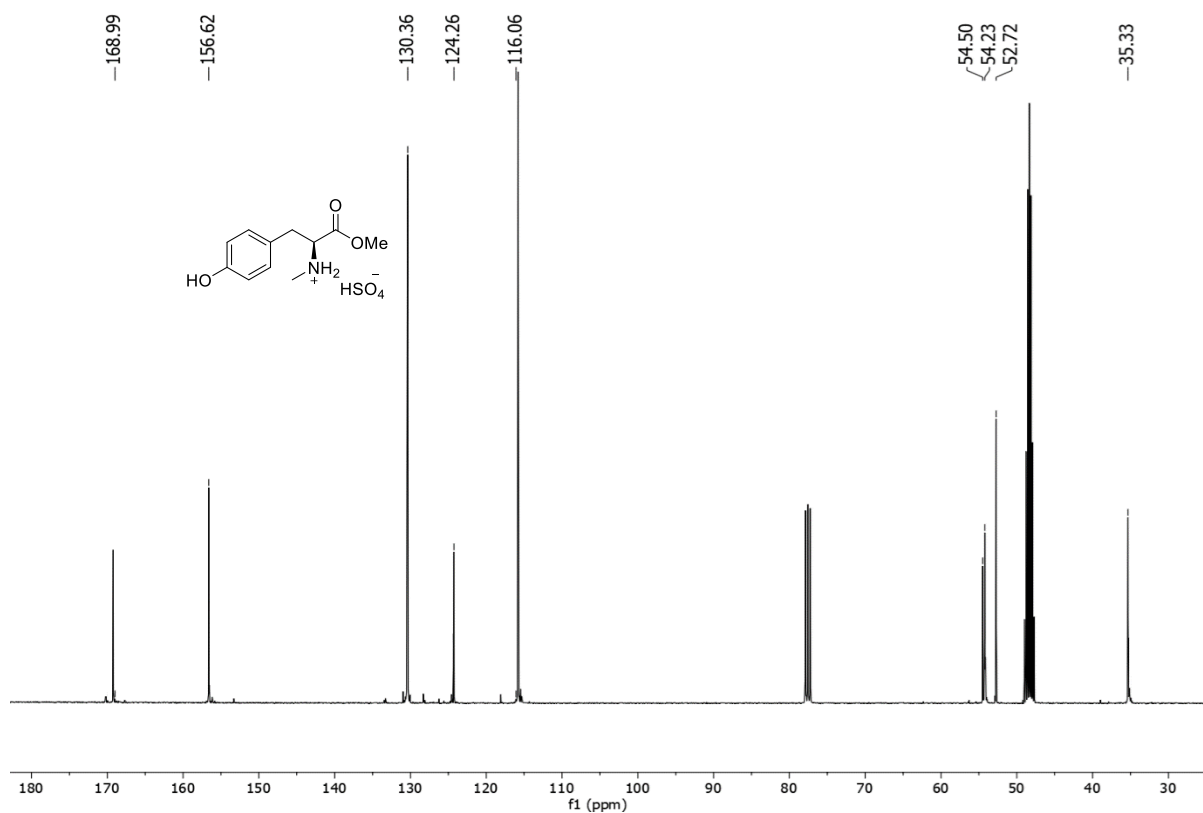

**Figure S91.** <sup>13</sup>C NMR of L-N-methyl tyrosine methyl ester ammonium in CD<sub>3</sub>OD + CDCl<sub>3</sub>

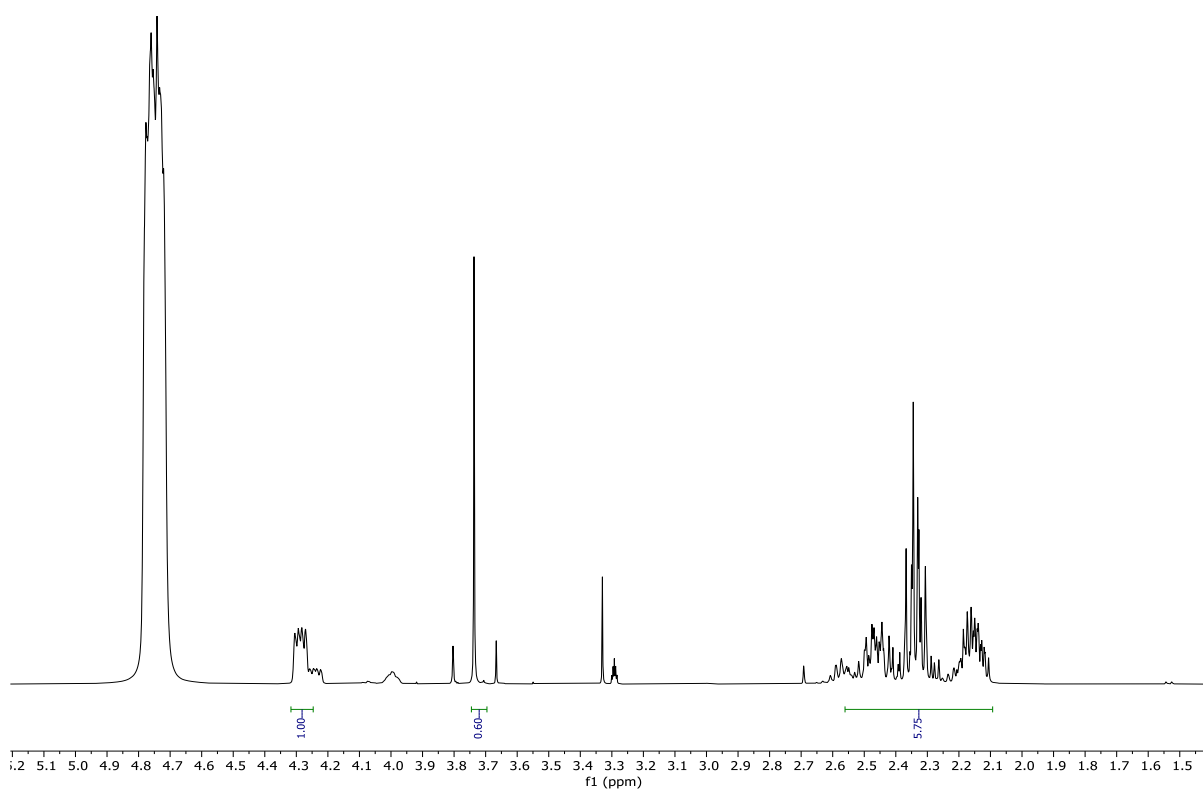

**Figure S92** <sup>1</sup>H NMR of L-Glutamine in H<sub>2</sub>SO<sub>4</sub>

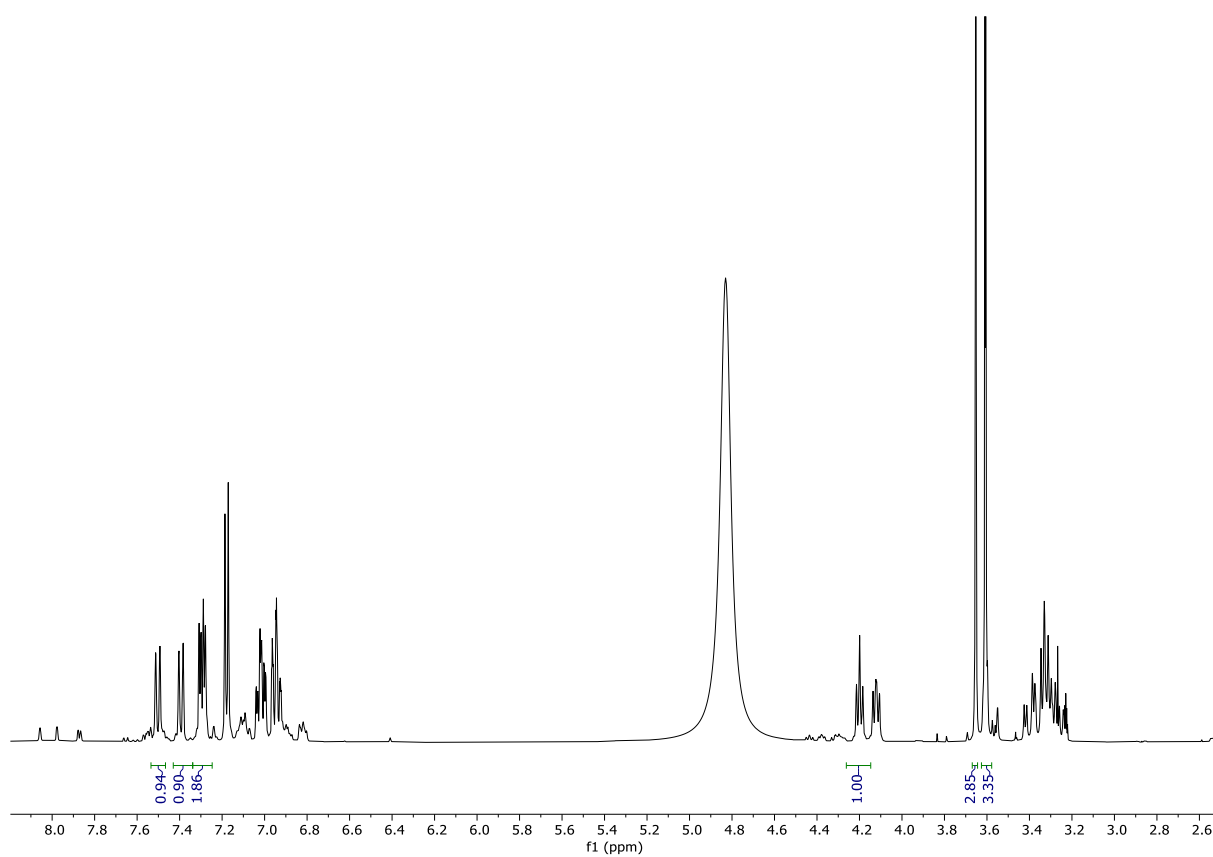

**Figure S93** <sup>1</sup>H NMR of L-Tryptophan in H<sub>2</sub>SO<sub>4</sub>

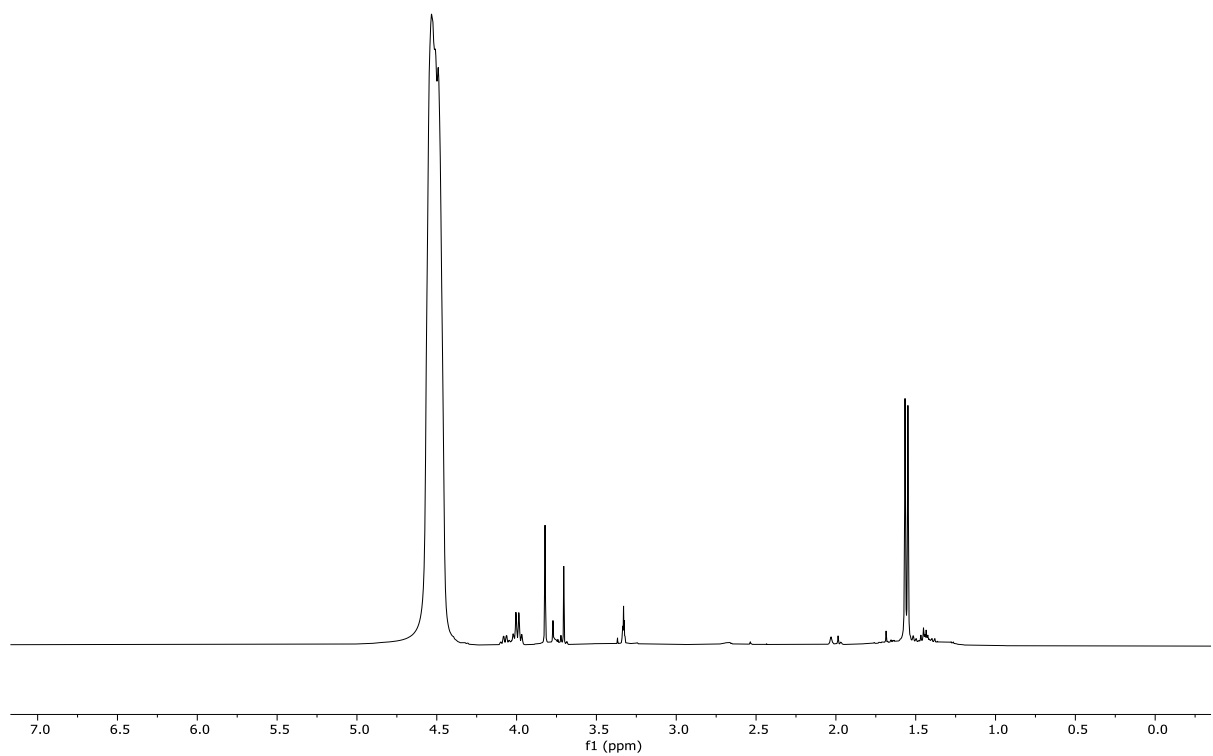

**Figure S94** <sup>1</sup>H NMR of L-Cystine in H<sub>2</sub>SO<sub>4</sub>

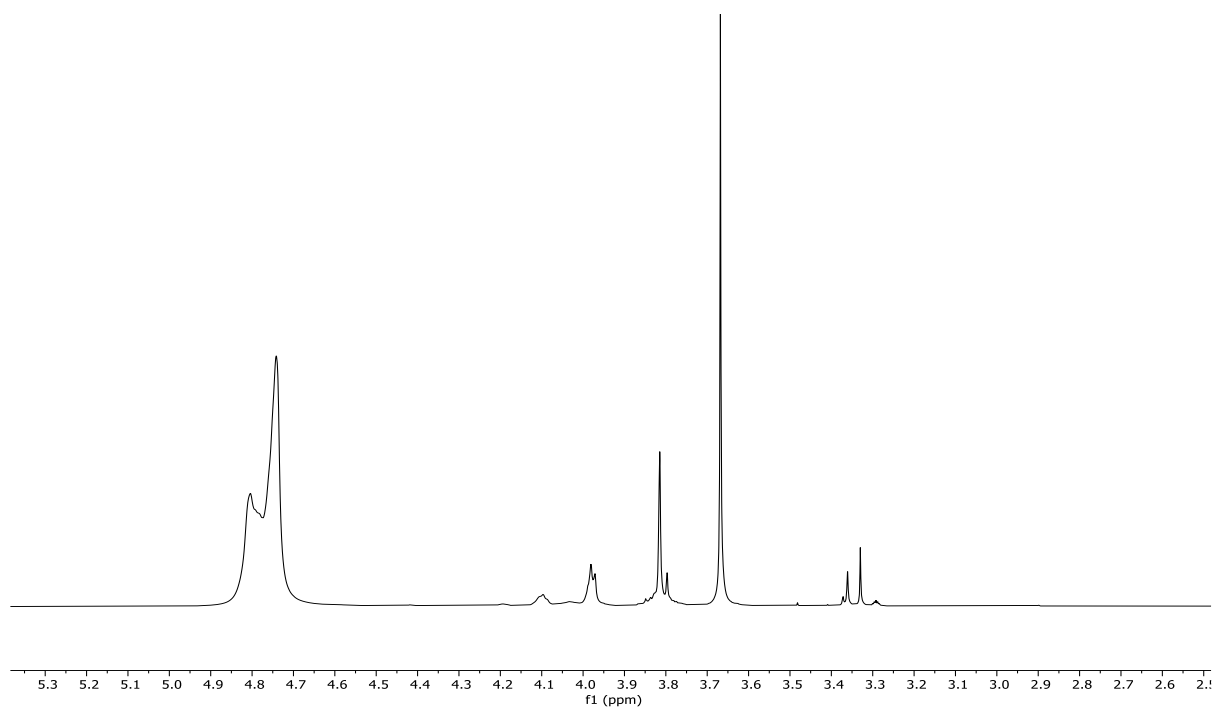

**Figure S95**  $^1\text{H}$  NMR of D-serine in  $\text{H}_2\text{SO}_4$

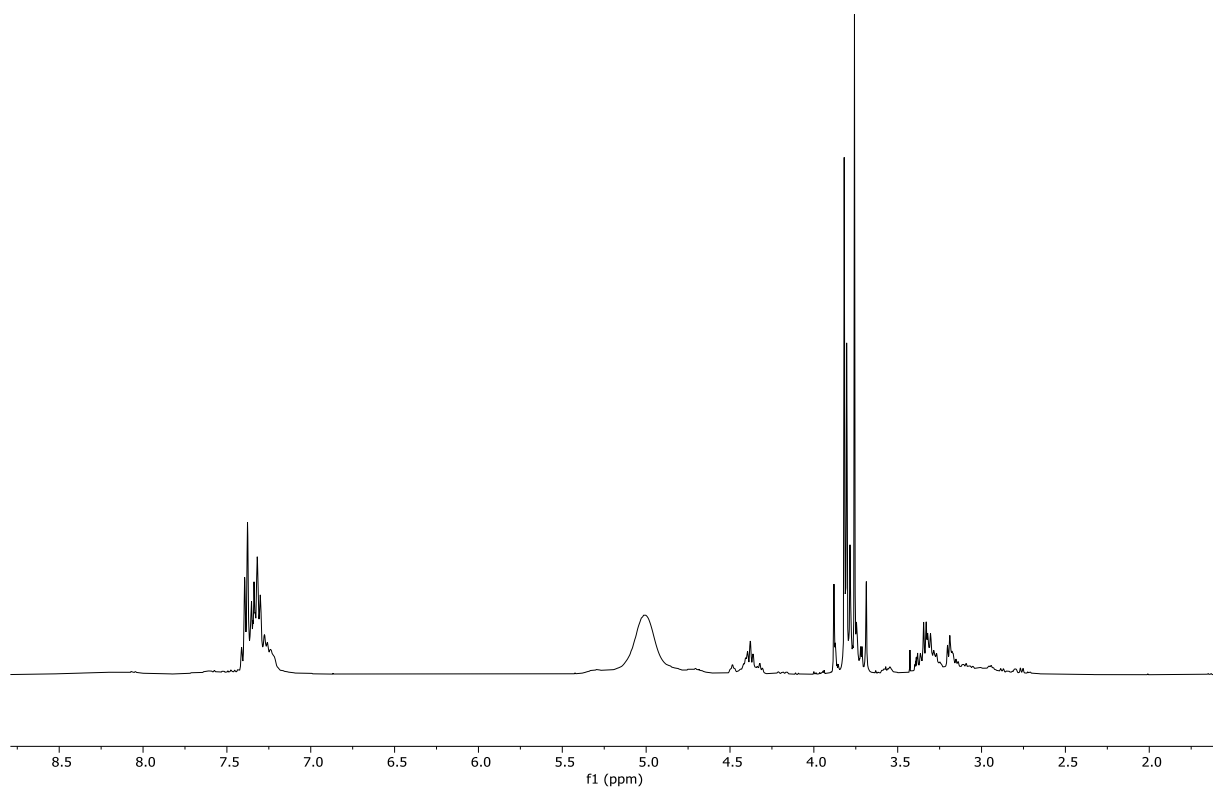

**Figure S96**  $^1\text{H}$  NMR of L-aspartame in  $\text{H}_2\text{SO}_4$

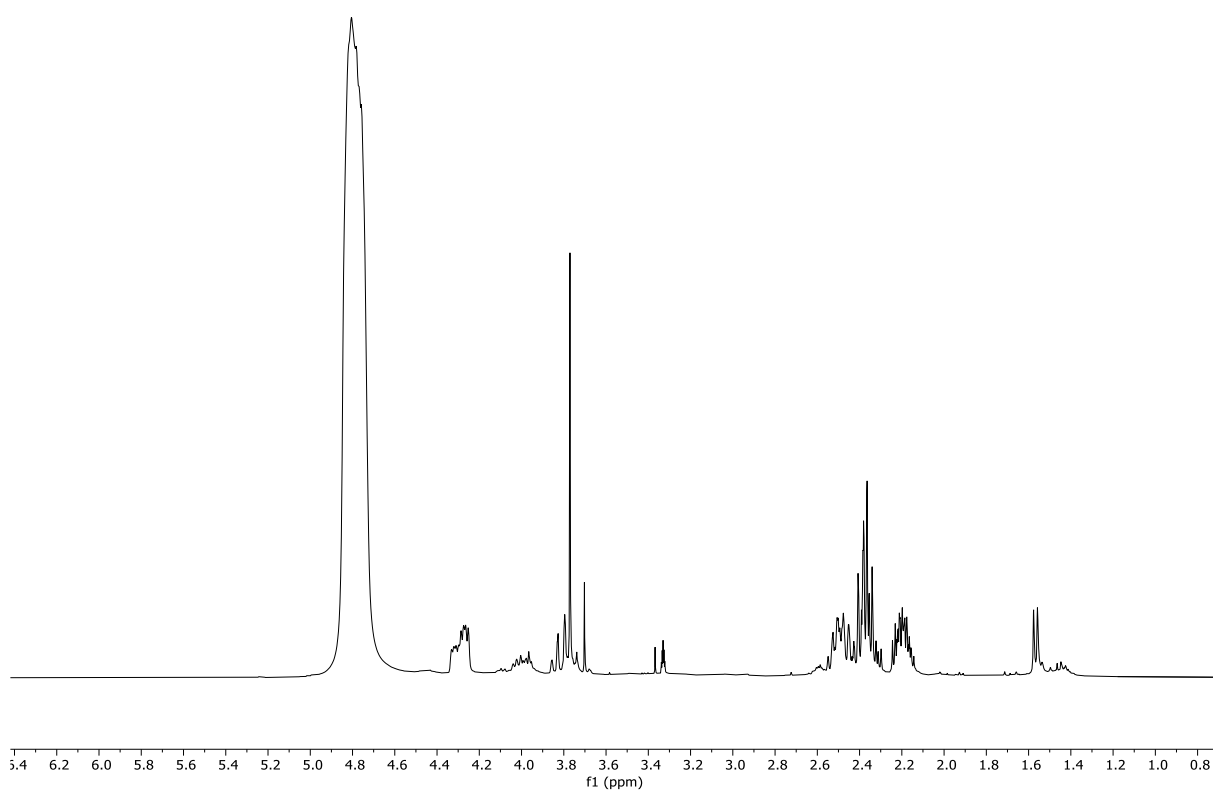

**Figure S97**  $^1\text{H}$  NMR of L-glutathione in  $\text{H}_2\text{SO}_4$

*N*-formylation of alanine.  $^1\text{H}$ -NMR ( $\text{CD}_3\text{OD}+\text{CDCl}_3$ ): 8.07 (s, 1H), 4.52-4.47 (q, 1H), 1.44-1.42 (d, 3H).

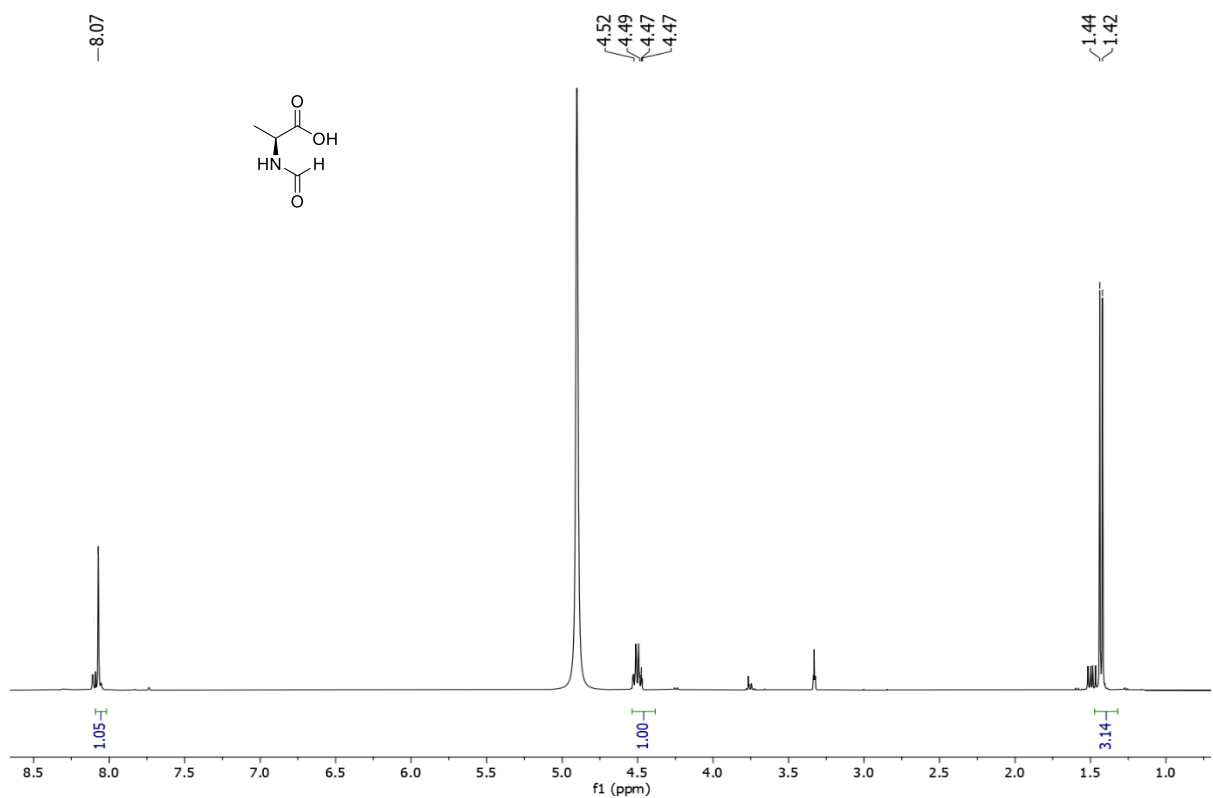

**Figure S98.**  $^1\text{H}$  NMR of *N*-formylation of L-alanine in  $\text{CD}_3\text{OD} + \text{CDCl}_3$

Chemical structure of (S)-2-isobutyl-2-oxo-3-oxopropanoic acid (isobutyraldehyde derivative) is shown above the spectrum.

<sup>1</sup>H NMR spectrum (DMSO-d<sub>6</sub>) showing peaks at 8.11 (s, 1H), 4.54 (d, 1H), 1.68 (s, 3H), 1.65 (s, 3H), 1.64 (s, 3H), 1.61 (s, 3H), 0.95 (s, 3H), and 0.91 (s, 3H). Integration values are 1.23, 1.00, 2.51, and 6.95.

<sup>1</sup>H NMR spectrum of compound 10a in CDCl<sub>3</sub>. The x-axis is labeled 'f1 (ppm)' and ranges from 1.5 to 8.5. The spectrum shows several peaks: a doublet at ~8.1 ppm (integral 1.02), a doublet at ~8.0 ppm (integral 0.92), a broad peak at ~4.8 ppm, a multiplet at ~4.2 ppm (integrals 0.92 and 0.95), a multiplet at ~3.5 ppm (integrals 2.01 and 1.92), and a complex multiplet at ~2.0 ppm (integrals 2.98 and 5.32).

S58

*N*-formylation of glycine.  $^1\text{H}$ -NMR ( $\text{CD}_3\text{OD}+\text{CDCl}_3$ ): 8.14 (s, 1H), 3.98-3.97 (d, 2H);  $^{13}\text{C}$ -NMR:  $\delta$  171.23, 162.55, 39.57.

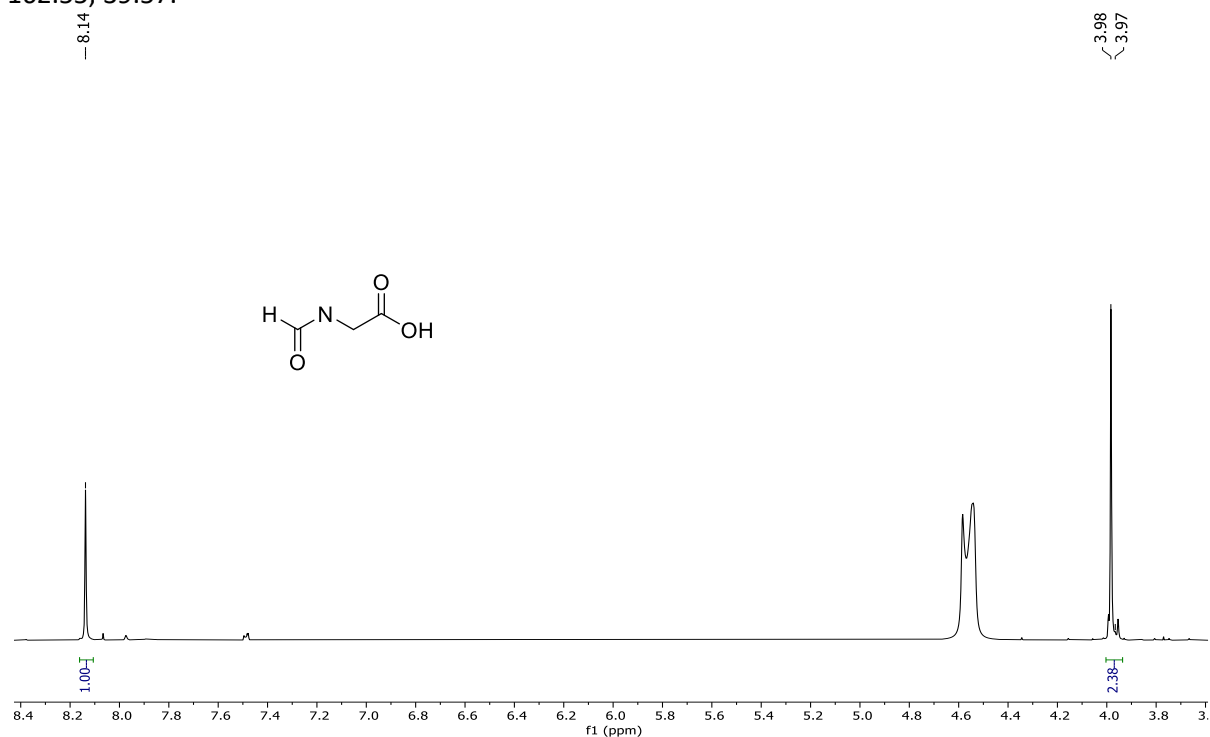

**Figure S101.**  $^1\text{H}$  NMR of *N*-formylation of L-glycine in  $\text{CD}_3\text{OD} + \text{CDCl}_3$

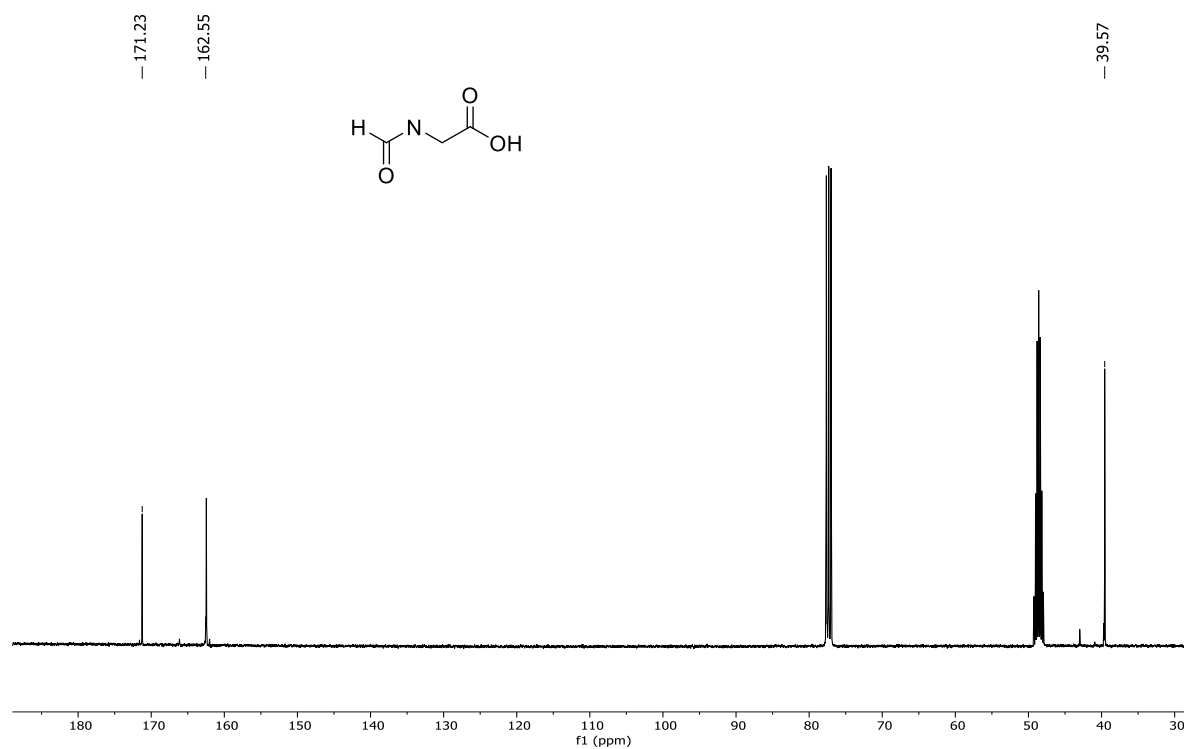

**Figure S102.**  $^{13}\text{C}$  NMR of *N*-formylation of L-glycine in  $\text{CD}_3\text{OD} + \text{CDCl}_3$

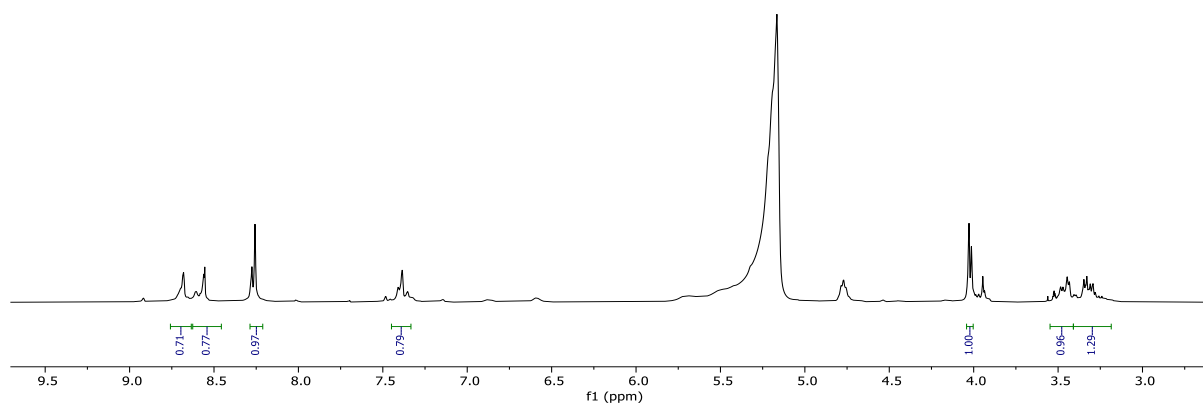

**Figure S103.**  $^1\text{H}$  NMR of *N*-formylation of L-histidine in  $\text{CD}_3\text{OD} + \text{CDCl}_3$   
*N*-formylation of L-tyrosine.  $^1\text{H}$ -NMR ( $\text{CD}_3\text{OD} + \text{CDCl}_3$ ): 8.04 (s, 1H), 7.03-7.01 (d, 2H), 6.73-6.71 (d, 2H), 4.75-4.77 (t, 1H), 3.14-2.68 (m, 2H);  $^{13}\text{C}$ -NMR:  $\delta$  173.03, 161.95, 155.79, 130.17, 127.07, 115.10, 52.39, 36.50.

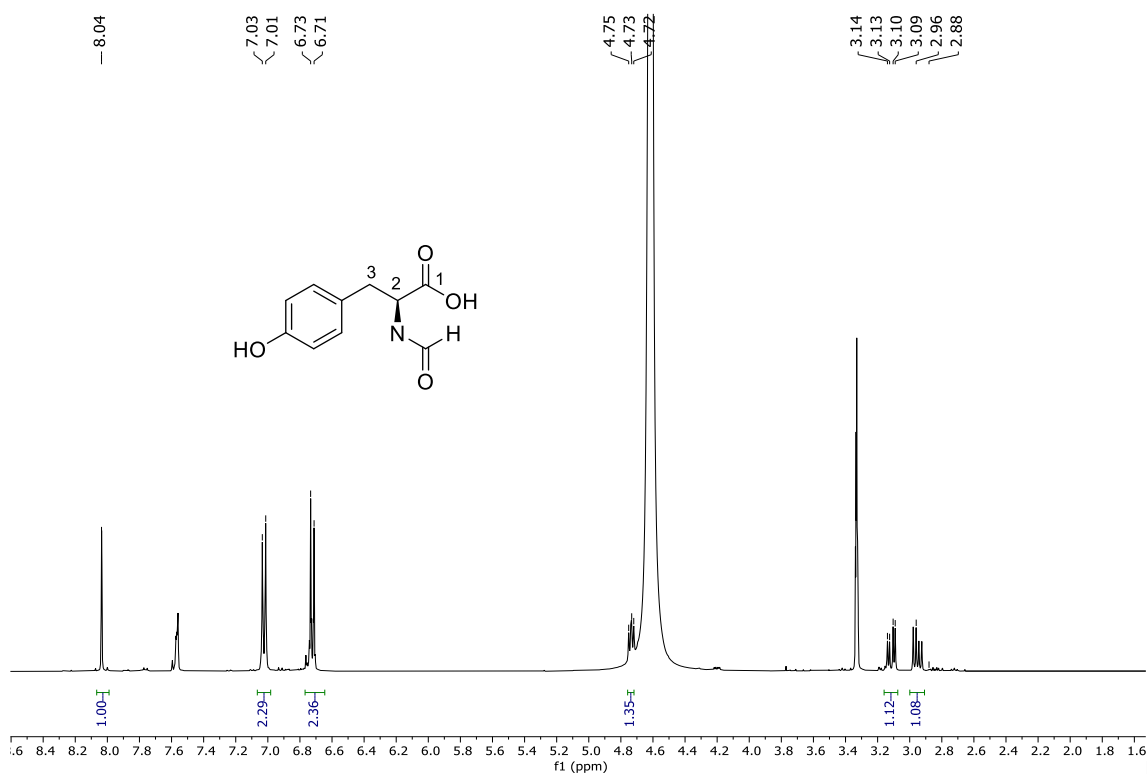

**Figure S104.**  $^1\text{H}$  NMR of *N*-formylation of L-tyrosine in  $\text{CD}_3\text{OD} + \text{CDCl}_3$

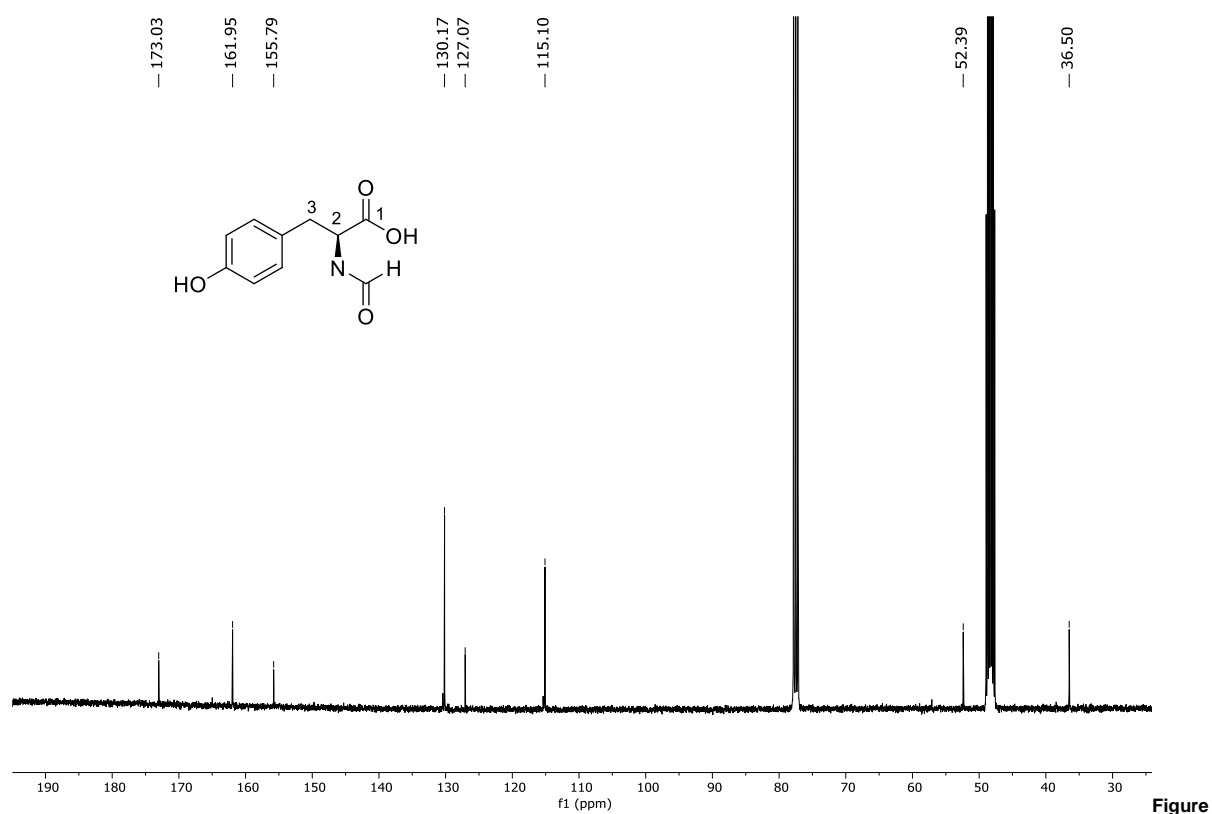

**Figure S105.** <sup>13</sup>C NMR of *N*-formylation of L-tyrosine in CD<sub>3</sub>OD + CDCl<sub>3</sub>

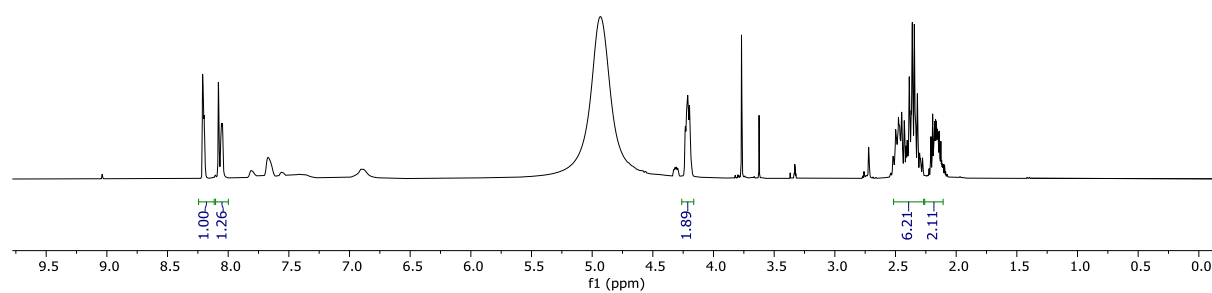

**Figure S106.** <sup>1</sup>H NMR of L-glutamine in formic acid

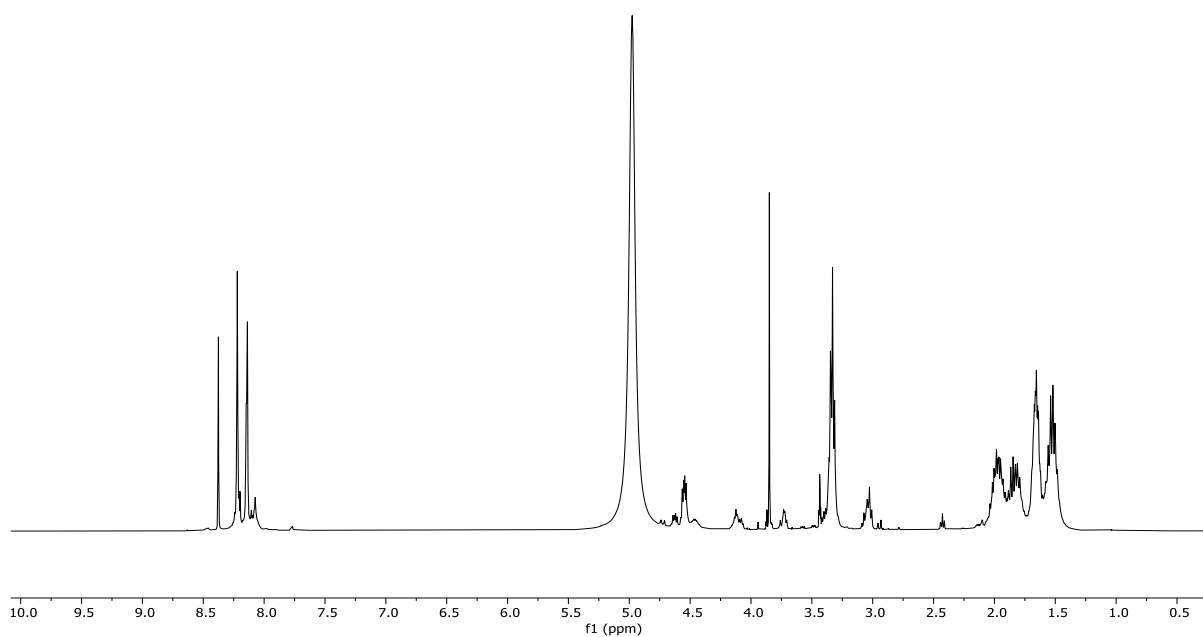

**Figure S107.**  $^1\text{H}$  NMR of L-lysine in formic acid

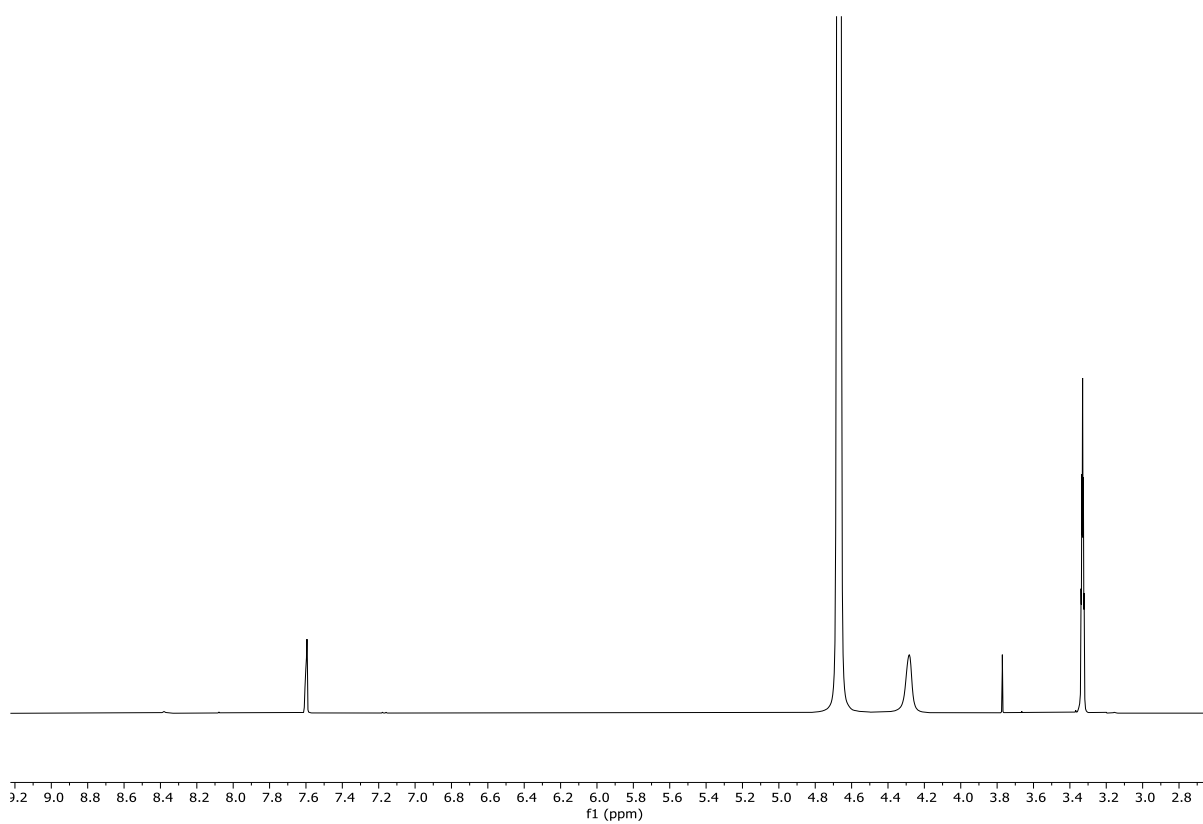

**Figure S108.**  $^1\text{H}$  NMR of L-cystine in formic acid

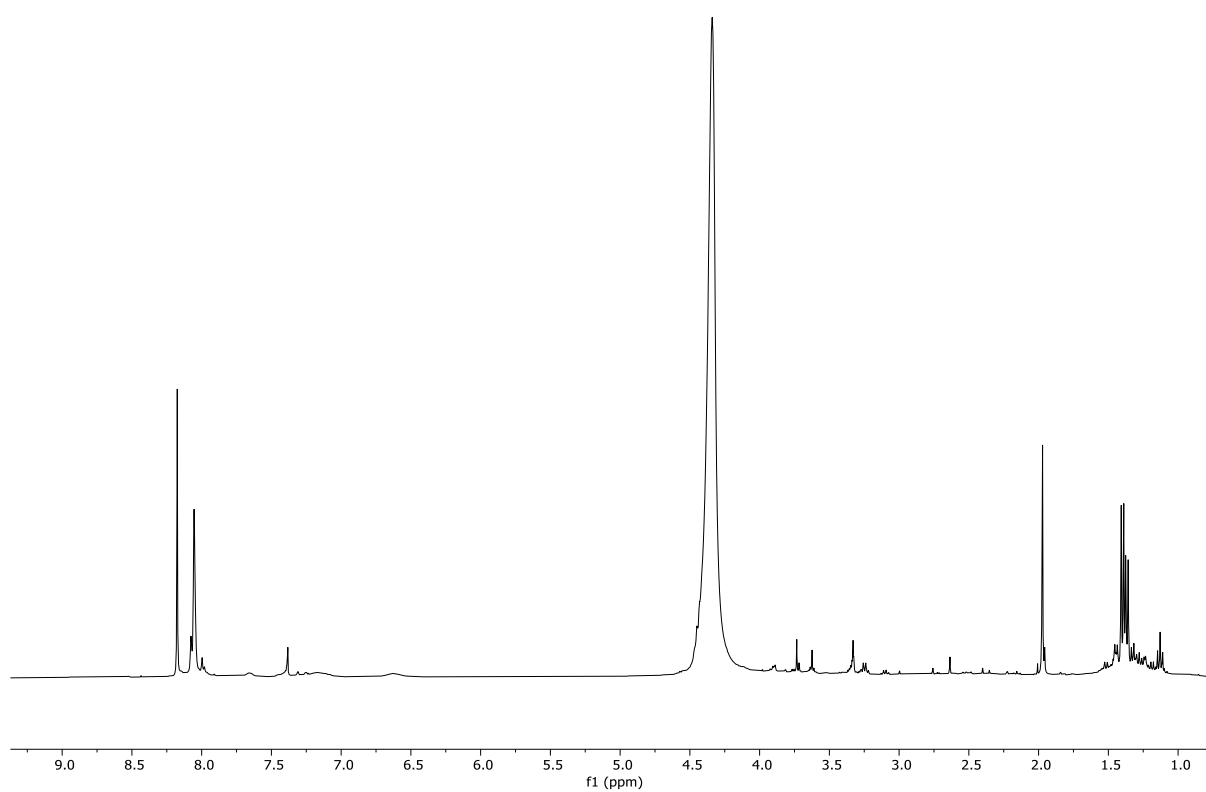

**Figure S109.**  $^1\text{H}$  NMR of D-serine in formic acid

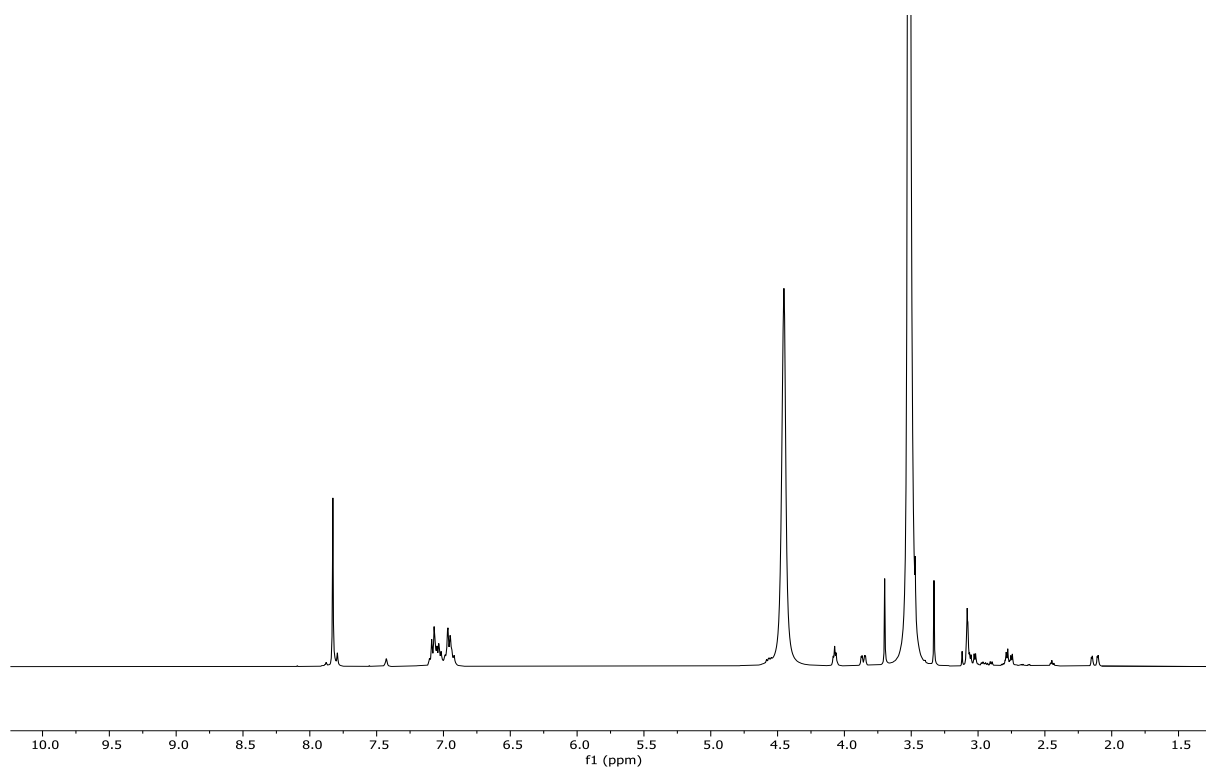

**Figure S110.**  $^1\text{H}$  NMR of aspartame in formic acid

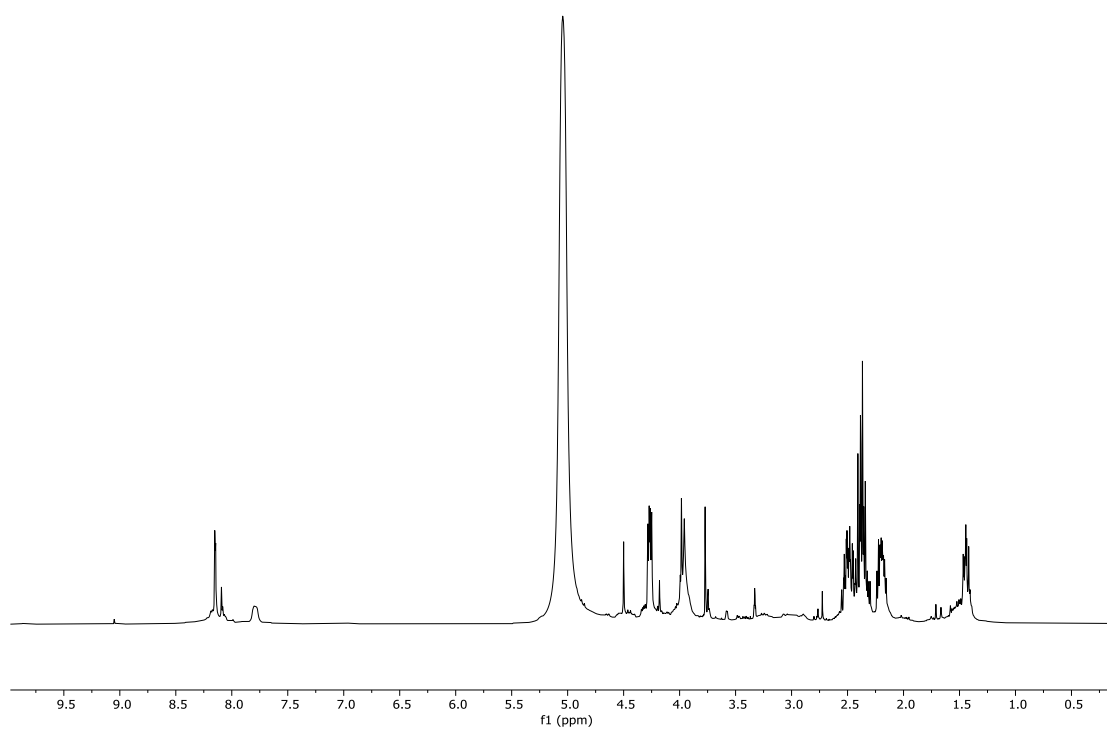

**Figure S111.**  $^1\text{H}$  NMR of L-glutathione in formic acid

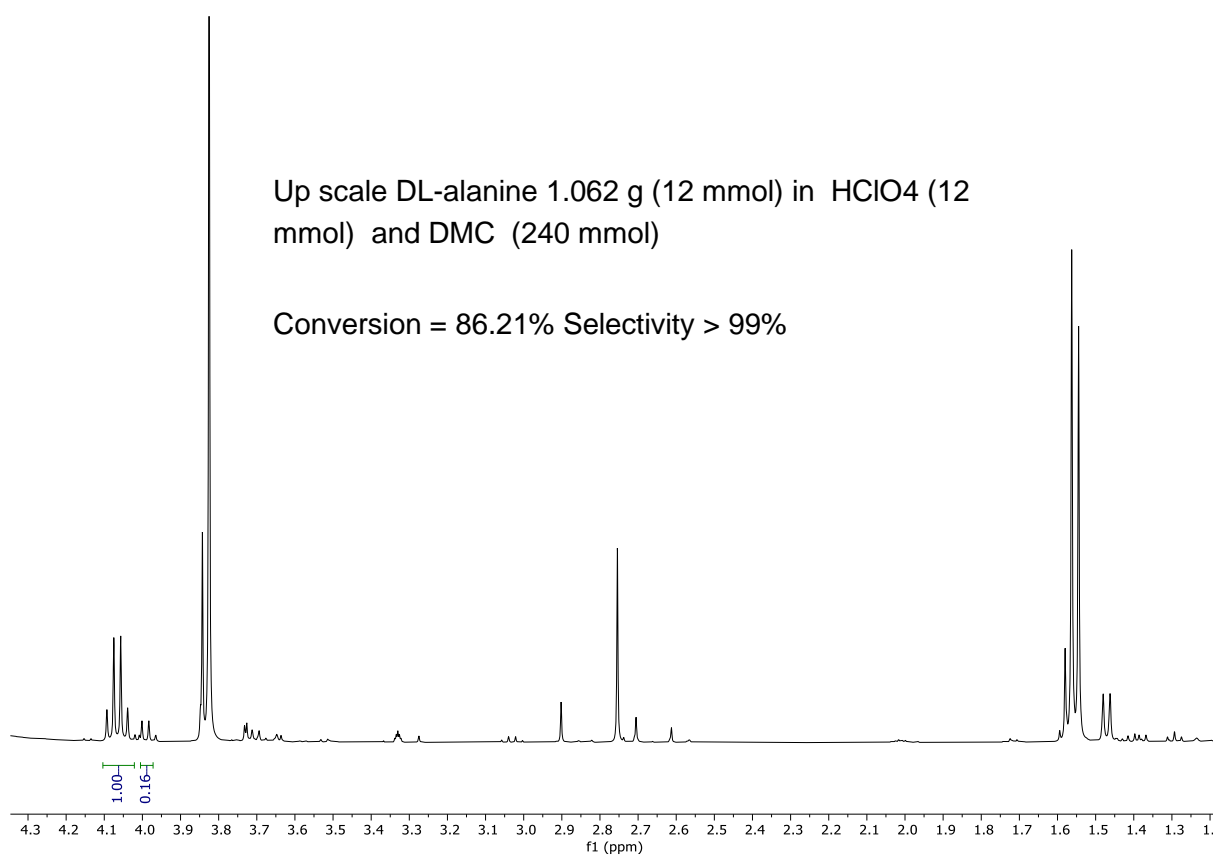

**Figure S112.**  $^1\text{H}$  NMR of upscale 12 times alanine reaction with  $\text{HClO}_4$

### 3. Green metrics calculations<sup>4-6</sup>

#### 3.1 Current methods (HClO<sub>4</sub>, H<sub>2</sub>SO<sub>4</sub>, and HCO<sub>2</sub>H)

##### O-Methylation

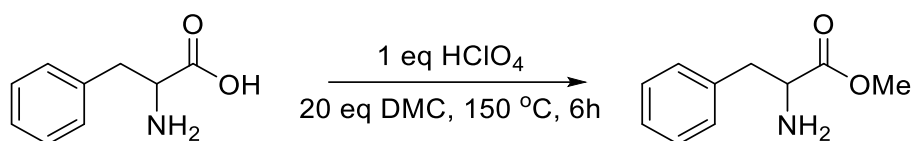

##### N,O-Dimethylation

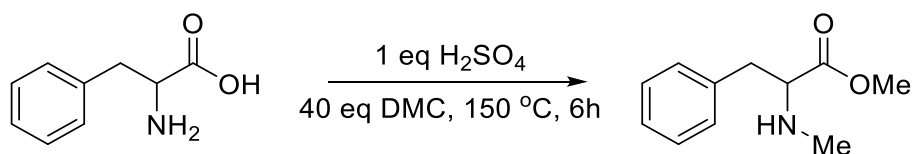

##### N-Formylation

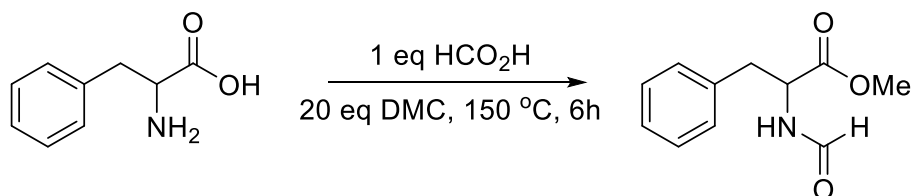

| Role            | Chemical                                            | Mass (g) | Volume (mL) | Density (g/mL) |
|-----------------|-----------------------------------------------------|----------|-------------|----------------|
| <b>Reaction</b> |                                                     |          |             |                |
| Reactant        | Phenylalanine                                       | 0.165    |             |                |
| Reactant (1 eq) | DMC                                                 | 0.09     | 0.084       | 1.07           |
| Reactant (2 eq) | DMC                                                 | 0.18     | 0.168       | 1.07           |
| Reagent         | HClO <sub>4</sub>                                   | 0.10     | 0.06        | 1.664          |
| Reagent         | H <sub>2</sub> SO <sub>4</sub>                      | 0.098    | 0.053       | 1.84           |
| Reagent         | HCO <sub>2</sub> H                                  | 0.046    | 0.038       | 1.22           |
| Solvent (19 eq) | DMC                                                 | 1.71     | 1.596       | 1.07           |
| Solvent (38 eq) | DMC                                                 | 3.42     | 3.276       | 1.07           |
|                 | <b>Reaction total (HClO<sub>4</sub>)</b>            | 2.065    |             |                |
|                 | <b>Reaction total (H<sub>2</sub>SO<sub>4</sub>)</b> | 3.863    |             |                |
|                 | <b>Reaction total (HCO<sub>2</sub>H)</b>            | 2.011    |             |                |
| <b>Product</b>  |                                                     |          |             |                |
| Product         | O-methylation (HClO <sub>4</sub> )                  | 0.179    |             |                |
| Product         | N,O-dimethylation (H <sub>2</sub> SO <sub>4</sub> ) | 0.193    |             |                |
| Product         | N-formylation (HCO <sub>2</sub> H)                  | 0.193    |             |                |

### **O-methylation (HClO<sub>4</sub>)**

$$\text{PMI (reaction)} = \frac{\text{Total mass in reaction}}{\text{Mass of product}} = \frac{2.065}{0.179} = 11.54$$

$$\text{E factor} = \frac{\text{Total mass of waste}}{\text{Mass of product}} = \frac{2.065 - 0.179}{0.179} = 10.54$$

$$\text{SI} = \frac{\text{Total mass of solvent}}{\text{Mass of product}} = \frac{1.71}{0.179} = 9.55$$

$$\text{WI} = \frac{\text{Total mass of water}}{\text{Mass of product}} = \frac{0}{0.179} = 0$$

### **N,O-dimethylation (H<sub>2</sub>SO<sub>4</sub>)**

$$\text{PMI (reaction)} = \frac{\text{Total mass in reaction}}{\text{Mass of product}} = \frac{3.863}{0.193} = 20.02$$

$$\text{E factor} = \frac{\text{Total mass of waste}}{\text{Mass of product}} = \frac{3.863 - 0.193}{0.193} = 19.02$$

$$\text{SI} = \frac{\text{Total mass of solvent}}{\text{Mass of product}} = \frac{3.42}{0.193} = 17.72$$

$$\text{WI} = \frac{\text{Total mass of water}}{\text{Mass of product}} = \frac{0}{0.193} = 0$$

### **N-formylation (HCO<sub>2</sub>H)**

$$\text{PMI (reaction)} = \frac{\text{Total mass in reaction}}{\text{Mass of product}} = \frac{2.011}{0.193} = 10.42$$

$$\text{E factor} = \frac{\text{Total mass of waste}}{\text{Mass of product}} = \frac{2.011 - 0.193}{0.193} = 9.42$$

$$\text{SI} = \frac{\text{Total mass of solvent}}{\text{Mass of product}} = \frac{1.71}{0.193} = 6.07$$

$$\text{WI} = \frac{\text{Total mass of water}}{\text{Mass of product}} = \frac{0}{0.193} = 0$$

### 3.2 Previous method for *O*-methylation (DMC, KHCO<sub>3</sub>)<sup>7</sup>

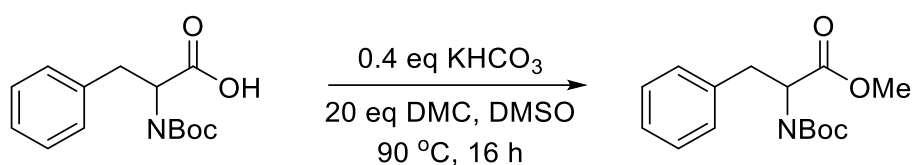

Experimental Procedures: To a 25 mL round-bottom flask equipped with magnetic stir bar, reflux condenser, and nitrogen inlet was added *N*-Boc phenylalanine (100 mg, 0.377 mmol), DMSO (0.2 M substrate concentration), and DMC (20 equiv). To the resulting solution was added potassium bicarbonate (15 mg, 0.15 mmol, 0.4 equiv) in one portion. The reaction mixture was magnetically stirred and heated to 90 °C for 16 h. After cooling to room temperature, the reaction was diluted with ethyl acetate (15 mL), washed with water (2 × 10 mL) and brine (1 × 10 mL), and dried with magnesium sulfate. After workup, the crude reaction mixture was further purified by column chromatography (19:1 hexanes/ethyl acetate eluent). *O*-methylation product was isolated as a white solid (72 mg, 68% yield).

| Role               | Chemical                          | Mass (g) | Volume (mL) | Density (g/mL) |
|--------------------|-----------------------------------|----------|-------------|----------------|
| <b>Reaction</b>    |                                   |          |             |                |
| Reactant           | <i>N</i> -Boc phenylalanine       | 0.100    |             |                |
| Reactant           | DMC                               | 0.679    | 0.635       | 1.07           |
| Reagent            | KHCO <sub>3</sub>                 | 0.015    | 0.635       | 1.664          |
| Solvent            | DMSO                              | 2.074    | 1.885       | 1.10           |
|                    | <b>Reaction total</b>             | 2.868    |             |                |
| <b>Work-up</b>     |                                   |          |             |                |
| Extraction solvent | Ethyl acetate                     | 13.53    | 15          | 0.902          |
| Washing solvent    | Water                             | 20       | 20          | 1.0            |
| Washing solution   | Brine                             | 12       | 10          | 1.2            |
| CC                 | Silica-gel column                 | 50       |             |                |
| Solvent            | Ethyl acetate                     | 4.51     | 5           | 0.902          |
| Solvent            | Hexane                            | 62.80    | 95          | 0.661          |
|                    | <b>Work-up total</b>              | 162.84   |             |                |
|                    | <b>Reaction and work-up total</b> | 165.71   |             |                |
| <b>Product</b>     |                                   |          |             |                |
| Product            | <i>O</i> -methylation             | 0.072    |             |                |

$$\text{PMI (reaction)} = \frac{\text{Total mass in reaction}}{\text{Mass of product}} = \frac{2.868}{0.072} = 39.83$$

$$\text{PMI (workup)} = \frac{\text{Total mass used for workup}}{\text{Mass of product}} = \frac{162.84}{0.072} = 2,261.67$$

$$\text{PMI (total)} = \frac{\text{Total mass process}}{\text{Mass of product}} = \frac{165.71}{0.072} = 2,301.53$$

$$E = \frac{\text{Total mass of waste}}{\text{Mass of product}} = \frac{165.71 - 0.072}{0.072} = 2,300.53$$

$$SI = \frac{\text{Total mass of solvent}}{\text{Mass of product}} = \frac{2.074 + 13.53 + 20 + 12 + 4.51 + 62.80}{0.072} = 1,596.03$$

$$WI = \frac{\text{Total mass of water}}{\text{Mass of product}} = \frac{20 + 12}{0.072} = 444.44$$

### 3.3 Previous method for *N*-methylation ( $\text{Me}_3\text{OBF}_4$ )<sup>8</sup>

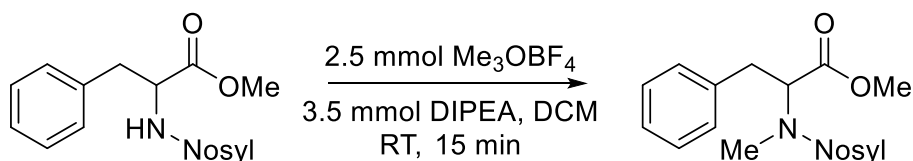

Experimental Procedures: To a solution of *N*-nosylphenylalanine methyl ester (1 mmol), in DCM (20 mL) were added DIPEA (3.5 mmol) and solid trimethyloxonium tetrafluoroborate (2.5 mmol). The reaction mixture was stirred for 15 min at room temperature and under an inert atmosphere. The mixture was then quenched with 1 N aqueous HCl until pH 2 and extracted with DCM (3x10 mL). The organic layer was washed with 1 N aqueous NaOH (3x10 mL) and then brine (10 mL). The combined organic layers were dried with  $\text{Na}_2\text{SO}_4$  and evaporated to dryness under reduced pressure conditions to give the respective *N*-methylation product as colorless oils in quantitative yields.

| Role               | Chemical                                   | Mass (g) | Volume (mL) | Density (g/mL) |
|--------------------|--------------------------------------------|----------|-------------|----------------|
| <b>Reaction</b>    |                                            |          |             |                |
| Reactant           | <i>N</i> -nosyl phenylalanine methyl ester | 0.100    |             |                |
| Reactant           | $\text{Me}_3\text{OBF}_4$                  | 0.099    |             |                |
| Reagent            | DIPEA                                      | 0.124    | 0.167       | 0.742          |
| Solvent            | Dichloromethane                            | 26.6     | 20          | 1.33           |
|                    | <b>Reaction total</b>                      | 26.923   |             |                |
| <b>Work-up</b>     |                                            |          |             |                |
| Quenched solution  | 1 N HCl                                    | 30.6     | 30          | 1.02           |
| Extraction solvent | Dichloromethane                            | 39.9     | 30          | 1.33           |
| Washing solution   | 1 N NaOH                                   | 31.2     | 30          | 1.04           |
| Washing solution   | Brine                                      | 12       | 10          | 1.2            |
|                    | <b>Work-up total</b>                       | 113.7    |             |                |
|                    | <b>Reaction and work-up total</b>          | 140.623  |             |                |
| <b>Product</b>     |                                            |          |             |                |
| Product            | <i>N</i> -methylation                      | 0.103    |             |                |

$$\text{PMI (reaction)} = \frac{\text{Total mass in reaction}}{\text{Mass of product}} = \frac{26.923}{0.103} = 261.39$$

$$\text{PMI (workup)} = \frac{\text{Total mass used for workup}}{\text{Mass of product}} = \frac{113.7}{0.103} = 1,103.88$$

$$\text{PMI (total)} = \frac{\text{Total mass process}}{\text{Mass of product}} = \frac{140.623}{0.103} = 1,365.27$$

$$E = \frac{\text{Total mass of waste}}{\text{Mass of product}} = \frac{140.623 - 0.103}{0.103} = 1,364.27$$

$$SI = \frac{\text{Total mass of solvent}}{\text{Mass of product}} = \frac{26.6 + 30.6 + 39.9 + 31.2 + 12}{0.103} = 1,362.14$$

$$WI = \frac{\text{Total mass of water}}{\text{Mass of product}} = \frac{30.6 + 31.2 + 12}{0.103} = 716.50$$

### 3.4 Previous method for *N*-formylation (FAPM)<sup>9</sup>

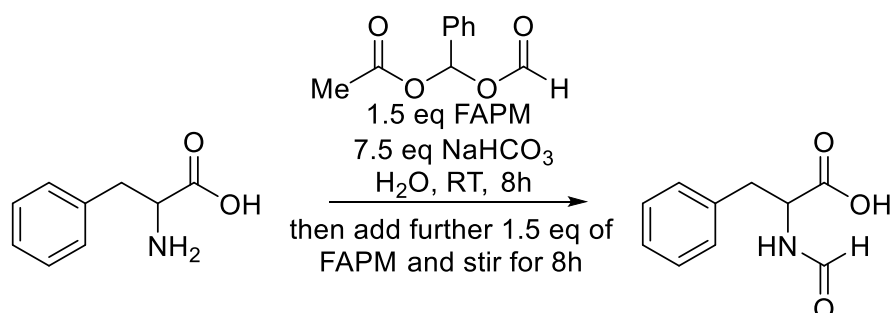

Experimental Procedures: (Formyloxy)(phenyl)methyl acetate (FAPM) (0.291 g, 1.5 mmol) was added to a solution of phenylalanine (1.0 mmol) and NaHCO<sub>3</sub> (0.630g, 7.5 mmol) in H<sub>2</sub>O (4 mL) and the reaction mixture stirred at room temperature for 8 h. A second portion of FAPM (1.5 mmol, 0.291 g) was then added and the reaction mixture stirred for a further 8 h. The reaction mixture was acidified (1 M HCl), extracted with CH<sub>2</sub>Cl<sub>2</sub> (10 mL x 3), the organic layers combined, dried (MgSO<sub>4</sub>) and concentrated in vacuo. The crude residue was then purified via recrystallization from EtOAc/petrol to afford the desired *N*-formylation product (0.166 g, 0.86 mmol).

| Role            | Chemical              | Mass (g) | Volume (mL) | Density (g/mL) |
|-----------------|-----------------------|----------|-------------|----------------|
| <b>Reaction</b> |                       |          |             |                |
| Reactant        | phenylalanine         | 0.33     |             |                |
| Reactant        | FAPM                  | 0.582    |             |                |
| Reagent         | NaHCO <sub>3</sub>    | 0.63     |             |                |
| Solvent         | Water                 | 4        | 4           | 1.0            |
|                 | <b>Reaction total</b> | 5.542    |             |                |
| <b>Work-up</b>  |                       |          |             |                |

|                    |                                   |        |    |       |
|--------------------|-----------------------------------|--------|----|-------|
| Quenched solution  | 1 M HCl                           | 30.6   | 30 | 1.02  |
| Extraction solvent | Dichloromethane                   | 39.9   | 30 | 1.33  |
| Solvent            | Ethyl acetate                     | 9.02   | 10 | 0.902 |
| Solvent            | Petroleum ether                   | 6.53   | 10 | 0.653 |
|                    | <b>Work-up total</b>              | 86.05  |    |       |
|                    | <b>Reaction and work-up total</b> | 91.592 |    |       |
| <b>Product</b>     |                                   |        |    |       |
| Product            | N-formylation                     | 0.166  |    |       |

$$\text{PMI (reaction)} = \frac{\text{Total mass in reaction}}{\text{Mass of product}} = \frac{5.542}{0.166} = 33.39$$

$$\text{PMI (workup)} = \frac{\text{Total mass used for workup}}{\text{Mass of product}} = \frac{86.05}{0.166} = 518.37$$

$$\text{PMI (total)} = \frac{\text{Total mass process}}{\text{Mass of product}} = \frac{91.592}{0.166} = 551.76$$

$$E = \frac{\text{Total mass of waste}}{\text{Mass of product}} = \frac{91.592 - 0.166}{0.166} = 550.76$$

$$SI = \frac{\text{Total mass of solvent}}{\text{Mass of product}} = \frac{4 + 30.6 + 39.9 + 9.02 + 6.53}{0.166} = 542.47$$

$$WI = \frac{\text{Total mass of water}}{\text{Mass of product}} = \frac{4 + 30.6}{0.166} = 208.43$$

## References

- 1 R. J. Ouellette and J. D. Rawn, in *Principles of Organic Chemistry*, eds. R. J. Ouellette and J. D. Rawn, Elsevier, Boston, 2015, pp. 371–396.
- 2 J. Trygg, P. Trivedi and P. Fardim, *Cellul. Chem. Technol.*, 2016, **50**, 557–567.
- 3 T. P. Silverstein and S. T. Heller, *J. Chem. Educ.*, 2017, **94**, 690–695.
- 4 D. Prat, A. Wells, J. Hayler, H. Sneddon, C. R. McElroy, S. Abou-Shehadeh and P. J. Dunn, *Green Chem.*, 2015, **18**, 288–296.
- 5 R. A. Sheldon, *ACS Sustainable Chem. Eng.*, 2018, **6**, 32–48.
- 6 S. Michałek, L. Gurba-Bryśkiewicz, W. Maruszak, M. Zagozda, A. M. Maj, Z. Ochal, K. Dubiel and M. Wieczorek, *RSC Adv.*, 2022, **12**, 33605–33611.
- 7 Y. Ji, J. Sweeney, J. Zoglio and D. J. Gorin, *J. Org. Chem.*, 2013, **78**, 11606–11611.
- 8 R. De Marco, M. L. Di Gioia, A. Liguori, F. Perri, C. Siciliano and M. Spinella, *Tetrahedron*, 2011, **67**, 9708–9714.
- 9 R. S. L. Chapman, R. Lawrence, J. M. J. Williams and S. D. Bull, *Org. Lett.*, 2017, **19**, 4908–4911.
